# Supplementary material for: An integrative monograph of Carex section Schoenoxiphium (Cyperaceae)
Source: PeerJ journal article supplement (doi:10.7717/peerj.11336), 2021-05-17
Supplement: FigS1.pdf [file FigS1.pdf]

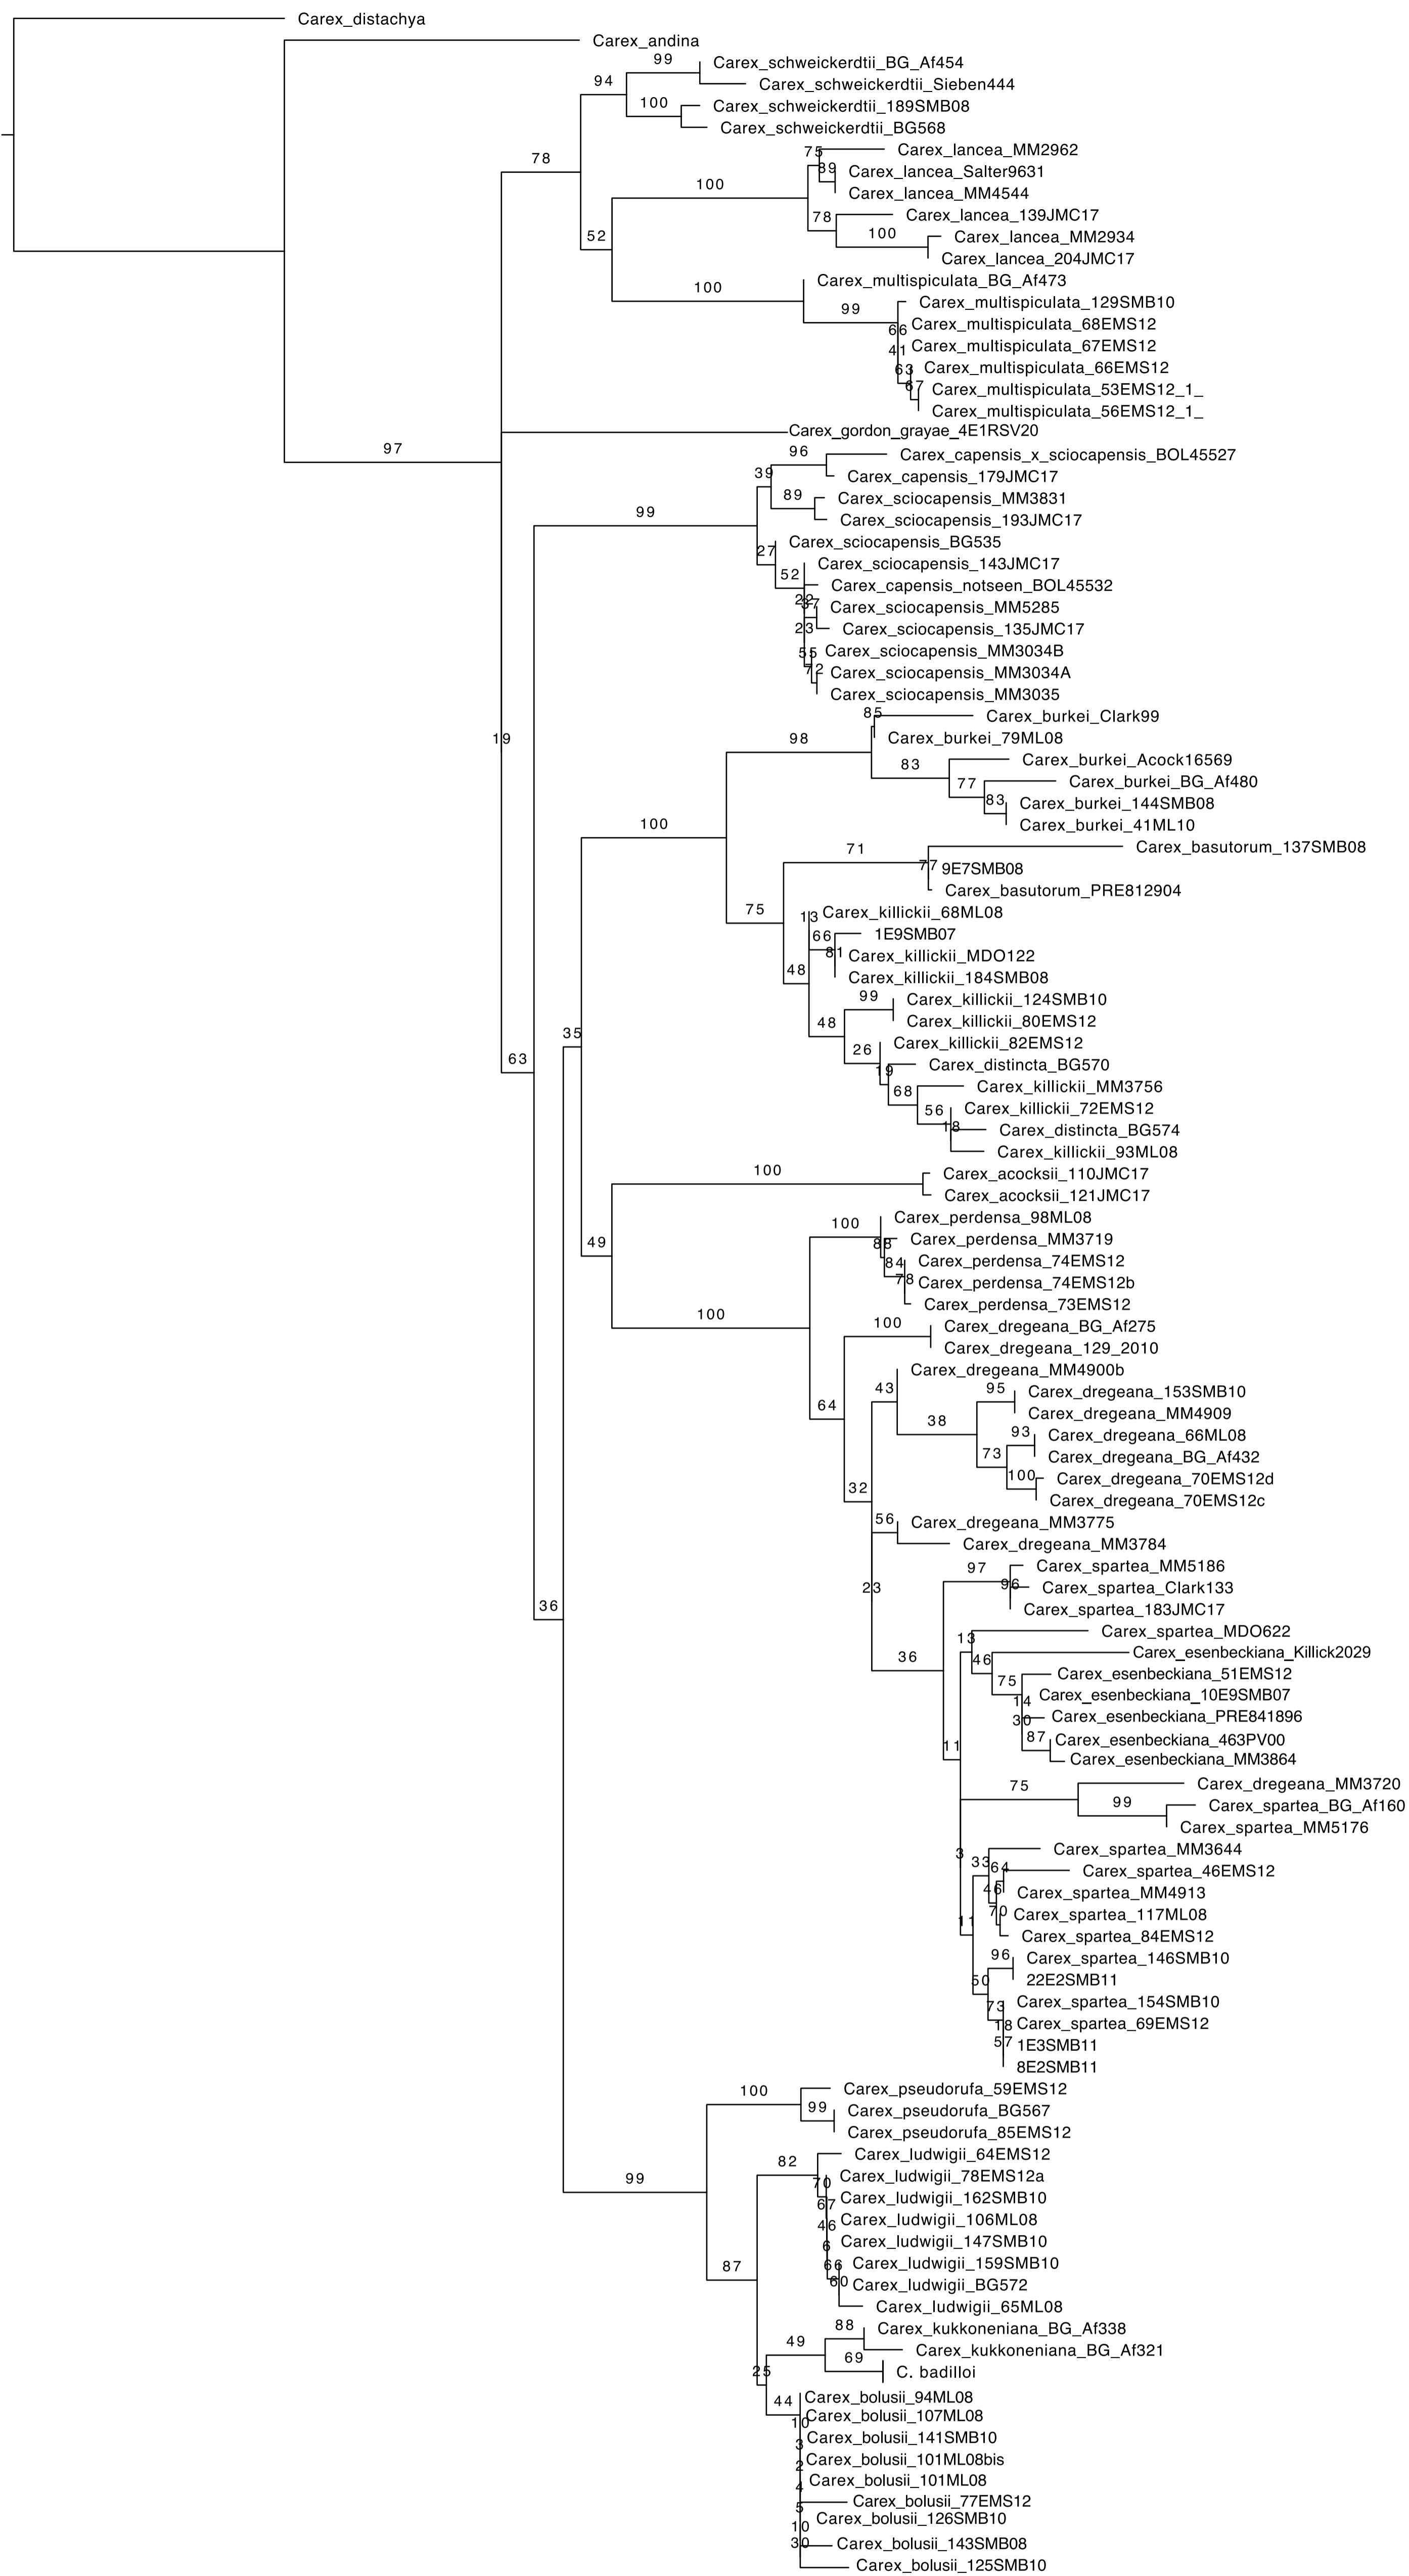

0.009
