# Supplementary material for: An integrative monograph of Carex section Schoenoxiphium (Cyperaceae)
Source: PeerJ. 2021 May 17;9:e11336. doi: 10.7717/peerj.11336 (PMC8136282; doi:10.7717/peerj.11336)
Supplement: Supplemental Information 1 — We also include in certain cases occurrences from iNaturalist, with the link to individual records. The materials were used, when possible, to take the measures set out in the key and descriptions. [file peerj-09-11336-s001.xlsx]

## Sheet: Tabla materiales Schoenoxiphium
	Country: Locality	Latitude	Longitude	Altitude	Habitat	Date	Voucher	Number of sheets / specimens	Reference
Carex acocksii C. Archer	South Africa: Northern Cape Province, Calvinia District, farm Van Rhynshoek, north-east of Calvinia on road to Klipwerf, top of Hantamsberg, in vicinity of FM tower.			1580 m.	Dolerite derived soil. Tufted perennial sedge, locally common under shrubs west of the FM tower.	03-X-1987	C. Reid 1337 (PRE-0762273-0) holotype; (BM-000611185), (GENT-0000090034770), (K-001044967), (MO-193695), (NBG0200446-0), (P-00199375), (S06-20520), (S-G-10688) isotypes	9
Carex acocksii C. Archer	South Africa: Northern Cape Province, Calvinia District, Hantam Mts.			1554 m.	flat dolerite top, in watercourse	14-XI-1955	J.P.H. Acocks 18638 (PRE-0107739) paratype	1
Carex acocksii C. Archer	South Africa: Northern Cape Province, Calvinia Div., Hantam Mts.	-31.385434	19.778635	1580 m.	dry rocky soils, protected by shrubs	11-X-2017	J.I. Márquez-Corro 110JMC17 et al. (UPOS)	1
Carex acocksii C. Archer	South Africa: Northern Cape Province, Calvinia Div., Hantam Mts.	-31.374914	19.784950	1568 m.	dry rocky soils	11-X-2017	J.I. Márquez-Corro 120JMC17, 121JMC17, 122JMC17 et al. (UPOS, PRE)	3
Carex acocksii C. Archer	South Africa: Northern Cape Province, Roggeveld, Vierfontein 65	-32.2054	20.3125	1450 m.	fynbos. Mountain peak. NW aspect. Well-drained sandy soil. Rocky soils or in Fynbos. Plateau. S aspect. Well-drained stony, loam soil. Shale. Dolerite. Full sun. Gentle slope. No biotic effect seen. Local, fairly common	21-XI-2013	N.A. Helme 7816 (NBG)	1
Carex badilloi Luceño & Márquez-Corro	South Africa: KwaZulu-Natal Province, Drakensberg mountains, Garden Castle Nature Reserve, pathway to Rhino Peak	-29.744228	29.205884	1800 m.	grassland	11-XI-2011	S. Martín-Bravo 96SMB11 (PRE) Holotype; (NU-0049308), (UPOS-6576) isotypes!	3
Carex badilloi Luceño & Márquez-Corro	Lesotho: Qacha's Nek District, Sehlabathebe National Park	-29.90414	29.11011	2500 m.	out over grassland near rocks and tarns,	20-I-1995	J. Browning 704 (NU)	1
Carex badilloi Luceño & Márquez-Corro	South Africa: Eastern Cape Province, Barkly East, New England, Abo Farm	-30.78	27.54	c. 1900 m.	grassland	3-IV-1941	P. Joubert 39145 (PRE)	1
Carex badilloi Luceño & Márquez-Corro	South Africa: KwaZulu-Natal Province, 5-7 miles NW of Castle View farm, headwaters of Mlahlangubo river	-29.4713	29.4163	6800 ft.	in dramp grassland	25-XI-1980	O.M. Hilliard & B.L. Burtt 13631 (NU)	1
Carex badilloi Luceño & Márquez-Corro	South Africa: KwaZulu-Natal Province, Drakensberg mountains, c. 40 km from Underberg, Garden Castle Forest Reserve, path to Rhino Peak	-29.732	29.183111	2000 m.	grassy path edge	19-XI-2010	S. Martín Bravo 145SMB10 et al. (UPOS)	1
Carex badilloi Luceño & Márquez-Corro	South Africa: KwaZulu-Natal Province, Drakensberg range, Cathedral Peak, Mlambonja Wilderness area, path to Cathedral Peak	-28.933583	29.178583	1900 m.	grassland	15-XI-2011	S. Martín-Bravo & M. Luceño 134SMB11 (UPOS)	1
Carex badilloi Luceño & Márquez-Corro	South Africa: KwaZulu-Natal Province, Garden Castle Forest Reserve	-29.745767	29.206983	1850 m.	grassland	16-XII-2008	M. Luceño 92ML08 et al. (UPOS)	1
Carex badilloi Luceño & Márquez-Corro	South Africa: KwaZulu-Natal Province, Garden Castle Forest Reserve	-29.745767	29.206983	1850 m.	grassland	16-XII-2008	M. Luceño 96ML08 et al. (UPOS)	1
Carex badilloi Luceño & Márquez-Corro	South Africa: KwaZulu-Natal Province, Garden Castle Forest Reserve	-29.744091	29.206178	1860 m.	grassland	16-XI-2012	E. Maguilla 76EMS12 et al. (UPOS)	1
Carex badilloi Luceño & Márquez-Corro	South Africa: KwaZulu-Natal Province, Giant's Castle Game Reserve	-29.088702	29.394714	7400 ft.		12-XII-1969	F. B. Wright 921 (NU)	1
Carex badilloi Luceño & Márquez-Corro	South Africa: KwaZulu-Natal Province, Ukhahlamba Drakensberg Park, Garden Castle Forest Reserve, path to Rhino Peak	-29.702418	29.186109		grassland	16-XII-2008	B. Gehrke and M. Pirie BG-Af 564 (UPOS)	1
Carex badilloi Luceño & Márquez-Corro	South Africa: KwaZulu-Natal Province, Underberg District, Garden Castle Forest Reserve	-29.745767	29.206983	c. 6000 ft.	in marsh by stream near forestry house	04-XII-1980	O.M. Hilliard & B.L. Burtt 13792 (P-01671137)	1
Carex badilloi Luceño & Márquez-Corro	South Africa: KwaZulu-Natal Province, Underberg District, headwaters of Mlahlangubo river, near Wilson's Cave	-29.4713	29.4163	2000 m.		18-I-1982	O.M. Hilliard & B.L. Burtt 15150 (NU)	1
Carex badilloi Luceño & Márquez-Corro	South Africa: KwaZulu-Natal Province, Underberg District, vicinity of Tarn Cave, above Bushman's nek	-29.858305	29.137825	8000 ft.	on slteep moist E-facing slope	21-I-1980	O.M. Hilliard & B.L. Burtt 17451 (NU)	1
Carex badilloi Luceño & Márquez-Corro	South Africa: KwaZulu-Natal, Mpendhle District, Path from Loteni N.R. to Redi	-29.59	29.82	7000 ft.	common patches in grassland	26-XII-1982	O.M. Hilliard & B.L. Burtt 16120 (NU)	1
Carex badilloi Luceño & Márquez-Corro	South Africa: Underberg District, Gxalingenwa valley, between Sani Pass and Polela valley	-29.583516	29.284244		damp facig slopes over sandstone tufted	11-XII-1983	O.M. Hilliard & B.L. Burtt 17185 (NU)	1
Carex badilloi Luceño & Márquez-Corro	South Africa: Underberg District, Gxalingenwa valley, between Sani Pass and Polela valley	-29.583516	29.284244		damp facig slopes near sandstone tufted	11-XII-1983	O.M. Hilliard & B.L. Burtt 13377 (NU)	1
Carex badilloi Luceño & Márquez-Corro	South Africa: Underberg District., Cobham Forest Station, Ndhlarini, Twentbeck	-29.708957	29.388477	6000 ft.	grassland above stream	9-XI-1980	O.M. Hilliard & B.L. Burtt 17186 (NU)	1
Carex basutorum (Turrill) Luceño & Martín-Bravo	Lesotho: Leribe District, Leribe Plateau	-28.822126	28.110310			XII-1913	A. Dieterlen 948 (K-000363525) lectotype; (PRE-0107825), (P-00540800) isotypes	3
Carex basutorum (Turrill) Luceño & Martín-Bravo	Lesotho, Maseru District, Roma, St. Michaels	-29.43	27.69	5400 ft.	in donga walls	XII-1975	M. Schmitz 6575 (PRE)	1
Carex basutorum (Turrill) Luceño & Martín-Bravo	Lesotho: Qacha's Nek District, Transkei, ca. 2 km down from border Police Station, just off the road	-30.131389	28.678056	1900 m.	sandstone rocky area	03-XII-1987	T. Sterver 463 (PRE)	1
Carex basutorum (Turrill) Luceño & Martín-Bravo	South Africa: Eastern Cape Province, Uitenhage, Winterhoek Mountains, Cockscomb	-33.575278	26.781111	5000 ft.	on damp spot on E. slope	30-XI-1958	E. Esterhuysen 28037 (K)	1
Carex basutorum (Turrill) Luceño & Martín-Bravo	South Africa: Free State Province, Golden Gate National Park	-28.509206	28.6168	1800-2100 m.	grassland in Leucosidea sericea scrub	13-XII-2008	S. Martín-Bravo et al. 137SMB08 (UPOS)	1
Carex basutorum (Turrill) Luceño & Martín-Bravo	South Africa: Free State Province, Golden Gate National Park, between Clarens and Phuthaditjhaba, path from Glen Reenen Rest Camp to Brandwag Butters Trail	-28.501746	28.614985	2054 m.	sandstone slope	20-I-2014	T. Villaverde et al. 141TVH14 (UPOS)	1
Carex basutorum (Turrill) Luceño & Martín-Bravo	South Africa: Free State Province, Golden Gate Highlands National Park, Orbietjiekom	-28.533889	28.704444		sand	13-XII-1988	Gertenbach & Groenewald 9047 (PRE)	1
Carex bolusii C.B. Clarke	South Africa: Eastern Cape Province, Graaff Reinet area, Monte Cave			4500 ft.	in saxoso graminosis	XII-1871	H. Bolus 1974 (K-000693809) lectotype; iso: BOL-70348	1
Carex bolusii C.B. Clarke	South Africa: KwaZulu-Natal Province						Buchanan 328 (K) syntype	1
Carex bolusii C.B. Clarke	South Africa: Eastern Cape Province, Barkly East District, Ben McDhi			9000 ft.	in grass tussocks on hillside	5-II-1983	O.M. Hillard & B.L. Burtt 16471 (H-1486367 holotype of S. bracteosum; (E-00200231), (GENT-0000090032912), (NU-0015688) isotypes	4
Carex bolusii C.B. Clarke	Lesotho: Leribe District, Pitseng, left side of the road in the ascent to de Mafika Lisiu Pass summit	-29.0663	28.4067	3101 m.	grasslands	14-I-2014	T. Villaverde 28TVH14 et al. (PRE) holotype of C. parvirufa; (NU-0049310, UPOS-8508) isotypes	3
Carex bolusii C.B. Clarke	Lesotho: Butha Buthe District, Tsehlanyane NP	-28.70	28.63	9500 ft.	wet slope	24-I-1962	R.A. Lubke 304 (P)	1
Carex bolusii C.B. Clarke	Lesotho: Leribe District, Hlotse	-29.071708	28.376686	2611 m.	stream edges	13-I-2014	T. Villaverde 2TVH14 et al. (UPOS)	1
Carex bolusii C.B. Clarke	Lesotho: Leribe District, Pitseng, Mafika Lisiu Pass	-29.065366	28.405722	3142 m.	wet meadow	14-I-2014	T. Villaverde 18TVH14 et al. (UPOS)	1
Carex bolusii C.B. Clarke	Lesotho: Leribe District, Pitseng, Mafika Lisiu Pass	-29.06925	28.391694	2821 m.	roadside	14-I-2014	T. Villaverde 35TVH14 et al. (UPOS)	1
Carex bolusii C.B. Clarke	Lesotho: Leribe District, Tsehlanyane NP, upper trail to Black Pool	-28.907347	28.439869	2141 m.	next to a waterfall	15-I-2014	T. Villaverde 64TVH14 et al. (UPOS)	1
Carex bolusii C.B. Clarke	Lesotho: Leribe District, Tsehlanyane NP, upper trail to Black Pool	-28.911216	28.435261	1990 m.	bush clearings	15-I-2014	T. Villaverde 55TVH14, 59TVH14, 61TVH14 et al. (UPOS)	3
Carex bolusii C.B. Clarke	Lesotho: Maseru District, between Semonkong and Roma	-29.758755	27.993641	2569 m.	sandy watercourse with Oxalis sp.	18-I-2014	T. Villaverde 120TVH14 et al. (UPOS)	1
Carex bolusii C.B. Clarke	Lesotho: Maseru District, between Semonkong and Roma	-29.700452	27.947416	2620 m.	stream edges	16-I-2014	T. Villaverde 84TVH14, 89TVH14 et al. (UPOS)	2
Carex bolusii C.B. Clarke	Lesotho: Maseru District, between Semonkong and Roma	-29.670913	27.922405	2423 m.	bush clearings of Helichrysum sp.	16-I-2014	T. Villaverde 83TVH14 et al. (UPOS)	1
Carex bolusii C.B. Clarke	Lesotho: Maseru District, between Semonkong and Roma	-29.700452	27.947416	2620 m.	stony meadows on basalts	16-I-2014	T. Villaverde 92TVH14, 93TVH14, 101TVH14 et al. (UPOS)	3
Carex bolusii C.B. Clarke	Lesotho: Maseru District, between Semonkong and Roma	-29.756583	27.990963	2582 m.	dry meadows	18-I-2014	T. Villaverde 124TVH14 et al. (UPOS)	1
Carex bolusii C.B. Clarke	Lesotho: Maseru District, Tsehlanyane NP	-28.900427	28.449511	2155 m.	path edges	15-I-2014	T. Villaverde 69TVH14, 70TVH14 et al. (UPOS)	2
Carex bolusii C.B. Clarke	Lesotho: Qacha's Nek District, Sehlabathebe N.P., base of Matadeng Pass	-29.8722	29.06	c. 2300 m.		25-I-1995	J. Browning 701 (NU)	1
Carex bolusii C.B. Clarke	Lesotho: Qacha's Nek District, Sehlabathebe NP, ground adjacent to Admin. & Res. Centre	-29.887720	29.066252	c. 2400 m.	mountainous grassland region	06-I-1976	A.C. Beverly 182 (NU)	1
Carex bolusii C.B. Clarke	Lesotho: Thaba-Tseka District, Sani Pass	-29.5692	29.2690	2850 m.	moist part of alpine grassland	15-I-1977	D.J.B. Killick 4145 (NU)	1
Carex bolusii C.B. Clarke	South Africa: Eastern Cape Province, Aberdeen District, Kamdebooberge, "sleeping Giant", Oaklands farm 104	-32.349267	23.900278	1403 m.	dense Olinia emarginata - Maytenus undata forest on SE-facing slopes below cliffs	25-I-2011	V.R. Clark 92 et al. (GRA)	1
Carex bolusii C.B. Clarke	South Africa: Eastern Cape Province, Aberdeen District, Kamdebooberge, "sleeping Giant", Plaas farm 96	-32.390278	23.834998	1754 m.	summit of plateau	23-I-2011	V.R. Clark 45 et al. (GRA)	1
Carex bolusii C.B. Clarke	South Africa: Eastern Cape Province, Coetzerberg region, Aasvoelkrans, Sneeuberg	-32.43	25.20	1200 m.	along stream in closed woodland	24-XI-2007	V.R. Clark 49 & M. Rose (BOL)	1
Carex bolusii C.B. Clarke	South Africa: Eastern Cape Province, Compassberg	-31.888889	24.5			III-1869	H. Bolus 1974 (BOL)	1
Carex bolusii C.B. Clarke	South Africa: Eastern Cape Province, Lady Grey District, Witteberg, Joubert's Pass	-30.715306	27.271460	7500 ft.	stony grass slopes	18-I-1979	O.M. Hilliard & B.L. Burtt 12210 (NU)	1
Carex bolusii C.B. Clarke	South Africa: Eastern Cape Province, Middel Water farm 415	-32.255833	25.095278	2000 m.	mountain slope	20-III-2007	V.R. Clark 287 & R.J. McKenzie (GRA)	1
Carex bolusii C.B. Clarke	South Africa: Eastern Cape Province, pr. Rhodes	-30.719166	27.9575	2040 m.	shrubs and stream edges	17-I-2008	C. Aedo et al. 15134 (MA, SALA)	2
Carex bolusii C.B. Clarke	South Africa: Eastern Cape Province, Sneeuberg, SE of Wapadsberg, Springfontein Proper farm 315	-31.888889	24.940556	1687 m.	open shrubland on metamorphic sediments	12-XII-2007	V.R. Clark 255 & C. Pienaar (GRA)	1
Carex bolusii C.B. Clarke	South Africa: Free State Province, Golden Gate Highlands National Park	-28.509280	28.6168	1980 m.	grassland in Leucosidea sericea shrubs	13-XII-2008	S. Martín Bravo 145SMB08 et al. (UPOS)	1
Carex bolusii C.B. Clarke	South Africa: Free State Province, Golden Gate Highlands National Park	-28.499047	28.619513	2023 m.	grassland in Leucosidea sericea shrubs	20-I-2014	T. Villaverde 136TVH14 et al. (UPOS)	1
Carex bolusii C.B. Clarke	South Africa: Free State Province, Golden Gate Highlands National Park	-28.500757	28.621604	2057 m.	rocky understory	20-I-2014	T. Villaverde 134TVH14 et al. (UPOS)	1
Carex bolusii C.B. Clarke	South Africa: Free State Province, Golden Gate Highlands National Park	-28.509281	28.6168	1970 m.	grassland in Leucosidea sericea shrubs	13-XII-2008	S. Martín Bravo 143SMB08 et al. (UPOS)	1
Carex bolusii C.B. Clarke	South Africa: Free State Province, Golden Gate Highlands National Park	-28.498771	28.618809	2070 m.	understory	20-I-2014	T. Villaverde 138TVH14 et al. (UPOS)	1
Carex bolusii C.B. Clarke	South Africa: Free State Province, Golden Gate Highlands National Park	-28.509280	28.6168	1800-2100 m.	grassland in Leucosidea sericea shrubs	12-XII-2008	M. Luceño 67ML08 et al. (UPOS)	1
Carex bolusii C.B. Clarke	South Africa: Free State Province, Golden Gate Highlands National Park	-28.49985	28.619169	2045 m.	grassland in Leucosidea sericea shrubs	20-I-2014	T. Villaverde 140TVH14 et al. (UPOS)	1
Carex bolusii C.B. Clarke	South Africa: Free State Province, Golden Gate Highlands National Park	-28.502222	28.620694	1967 m.	dry meadows in burned bush clearings of Leucosidea sericea	15-I-2010	M. Luceño 42ML10 et al. (UPOS)	1
Carex bolusii C.B. Clarke	South Africa: Free State Province, Golden Gate Highlands National Park	-28.50	28.61	1800-2000 m.	grassland in burned bush clearings of Leucosidea sericea	13-XII-2008	S. Martín-Bravo 139SMB08 et al. (UPOS)	1
Carex bolusii C.B. Clarke	South Africa: Free State Province, Dumbe Cottages	-28.5534	29.1479	1795 m.	montane grassland, in shade near waterfall	19-I-2008	A.M. Muasya 3754 & C.H. Stirton (BOL, UPOS)	2
Carex bolusii C.B. Clarke	South Africa: KwaZulu-Natal Province, Bergville District, Mout aux Sources	-28.7451	28.8947	9800 ft.	grassland	17-III-1955	D. Edwards 610 (NU)	1
Carex bolusii C.B. Clarke	South Africa: KwaZulu-Natal Province, Bergville, Cathedral Peak Forest Research Station	-28.932141	29.177410	6550 ft.	slope	08-XI-1951	D.J.B. Killick 1545 (NU)	1
Carex bolusii C.B. Clarke	South Africa: KwaZulu-Natal Province, Bushman's Nek	-29.841638	29.216555	1779 m.	grassland	15-XI-2012	E. Maguilla 70EMS12 et al. (UPOS)	1
Carex bolusii C.B. Clarke	South Africa: KwaZulu-Natal Province, Bushman's Nek	-29.840249	29.216805	1850 m.	open meadows on dry slopes	12-XI-2011	S. Martín-Bravo 109SMB11 & M. Luceño (UPOS)	1
Carex bolusii C.B. Clarke	South Africa: KwaZulu-Natal Province, Bushman's Nek	-29.8722	29.1439	c. 8000 ft.	stream bank	23-XI-1983	O.M. Hilliard & B.L. Burtt 16909 (NU, P)	2
Carex bolusii C.B. Clarke	South Africa: KwaZulu-Natal Province, Cobham Forest Reserve, "Lakes" cave area	-29.6567	29.3676	7000 ft.	edge of marsh on slope	15-XII-1982	O.M. Hilliard & B.L. Burtt 16057 (NU)	1
Carex bolusii C.B. Clarke	South Africa: KwaZulu-Natal Province, Garden Castle Forest Reserve	-29.7237	29.1693	2267 m.	grassland on slope	19-XI-2010	S. Martín-Bravo 141SMB10 et al. (UPOS)	1
Carex bolusii C.B. Clarke	South Africa: KwaZulu-Natal Province, Garden Castle Forest Reserve	-29.734688	29.169238	1920 m.	grassland	16-XII-2008	M. Luceño 101ML08 et al. (UPOS)	1
Carex bolusii C.B. Clarke	South Africa: KwaZulu-Natal Province, Garden Castle Forest Reserve	-29.750305	29.211972	1803 m.	stream edges	16-XI-2012	E. Maguilla 77EMS12 et al. (UPOS)	1
Carex bolusii C.B. Clarke	South Africa: KwaZulu-Natal Province, Garden Castle Forest Reserve	-29.750058	29.20011	1810 m.	grassland	16-XII-2008	M. Luceño 107ML08 et al. (UPOS)	1
Carex bolusii C.B. Clarke	South Africa: KwaZulu-Natal Province, Garden Castle Forest Reserve	-29.747694	29.208775	c. 6000 ft.	marsh by stream	04-XII-1980	O.M. Hilliard & B.L. Burtt 13792 (NU)	1
Carex bolusii C.B. Clarke	South Africa: KwaZulu-Natal Province, Garden Castle Forest Reserve	-29.7355405	29.2011638	1850 m.	grassland	16-XII-2008	M. Luceño 94ML08 et al. (UPOS)	1
Carex bolusii C.B. Clarke	South Africa: KwaZulu-Natal Province, Mpendhle District, Tillietudlem	-29.6158	29.9673	5800 ft.	streamside on mountain slope	09-XII-1980	O.M. Hilliard & B.L. Burtt 13855 (K)	1
Carex bolusii C.B. Clarke	South Africa: KwaZulu-Natal Province, Mpendhle District, Kamberg area, Storm Heights			7000 ft.	in wet mats in rock sheets	15-XII-1978	O.M. Hilliard & B.L. Burtt 11718 (NU)	1
Carex bolusii C.B. Clarke	South Africa: KwaZulu-Natal Province, Royal KwaZulu-Natal Province N.P., Tiger falls	-28.7109	28.9222	5500 ft.	on forest path	03-II-1982	O.M. Hilliard & B.L. Burtt 15404 (NU)	1
Carex bolusii C.B. Clarke	South Africa: KwaZulu-Natal Province, Sani Pass	-29.588800	29.292316	2730 m.		05-II-1994	J. Browning 653 (NU)	1
Carex bolusii C.B. Clarke	South Africa: KwaZulu-Natal Province, Underberg District, 5-7 miles NW of Castle View farm,	-29.4697	29.4121	7000 ft.	damp grass slope	18-I-1982	O.M. Hilliard & B.L. Burtt 15138 (NU)	1
Carex bolusii C.B. Clarke	South Africa: KwaZulu-Natal Province, Underberg District, Chameleon Cave area	-29.6621	29.2637	6600 ft.	in loose deep soil above stream	02-XII-1987	O.M. Hilliard & B.L. Burtt 17818 (NU)	1
Carex bolusii C.B. Clarke	South Africa: KwaZulu-Natal Province, Underberg District, Cobham Forest Reserve, "Lakes" cave area			7000 ft.		3-XII-1982	O.M. Hilliard 16015 et al. (NU)	1
Carex bolusii C.B. Clarke	South Africa: KwaZulu-Natal Province, Underberg District, Cobham Forest Reserve, upper Pholela Cave area	-29.6402	29.3172	7500 ft.	grass slopes	16-II-1979	O.M. Hilliard & B.L. Burtt 12626 (NU)	1
Carex bolusii C.B. Clarke	South Africa: KwaZulu-Natal Province, Underberg District, north side of Bamboo Mt., near Umzimkulwana river			5200 ft.	damp grass slope	22-XI-1982	O.M. Hilliard & B.L. Burtt 15659 (NU)	1
Carex bolusii C.B. Clarke	South Africa: KwaZulu-Natal Province, Underberg District, Sani Pass	-29.602407	29.331496	6700 ft.	moist grass slopes	03-XII-1984	O.M. Hilliard & B.L. Burtt 17922 (NU)	1
Carex bolusii C.B. Clarke	South Africa: KwaZulu-Natal Province, Witsieshoek mountain resort	-28.687183	28.914483	2195 m.	slopes in path edges	16-XI-2010	S. Martín-Bravo 125 y 126SMB10 et al. (UPOS)	2
Carex bolusii C.B. Clarke	Lesotho: Thaba Tseka District, Sani Pass	-29.569283	29.269002	2880 m.	wet alpine grassland	17-XII-2008	S. Martín Bravo 163SMB08 et al. (UPOS)	1
Carex bolusii C.B. Clarke	South Africa: KwaZulu-Natal Province, Lotheni	-29.44	29.42	2500 m.		II-2006	D. Kotze MDO508 (UPOS)	1
Carex burkei (C.B. Clarke) Luceño & Martín-Bravo	South Africa: Eastern Cape, Cradock Div., Inxuba Yethemba Local Municipality						Burke 211 (K-000693801) lectotype	1
Carex burkei (C.B. Clarke) Luceño & Martín-Bravo	Lesotho: Leribe District, LHDA Phase 1A	-29.334722	28.409444	2170 m.	NW-facing slope with overgrazed grassland and low cliffs and rock outcrops	11-I-1996	P.B. Phillipson 4481 et al. (P)	1
Carex burkei (C.B. Clarke) Luceño & Martín-Bravo	Lesotho: Leribe District, Tsehlanyane NP, upper trail to Black Pool	-28.911216	28.435261	1990 m.	scrub clearing	15-I-2014	T. Villaverde 58TVH14 et al. (UPOS)	1
Carex burkei (C.B. Clarke) Luceño & Martín-Bravo	Lesotho: Maseru District, Khalong-la-Mashulu				rocky slopes	20-XII-1967	A. Jacot Guillarmod 5791 (PRE)	1
Carex burkei (C.B. Clarke) Luceño & Martín-Bravo	Lesotho: Maseru District, Makhaleng			6400 ft.		27-III-1960	M. Ruch 1680 (PRE)	1
Carex burkei (C.B. Clarke) Luceño & Martín-Bravo	Lesotho: Maseru District, Marakabeis	-29.56	28.14		on edge of precipice	8-XII-1991	J. Browning 432 (NU)	1
Carex burkei (C.B. Clarke) Luceño & Martín-Bravo	Lesotho: Mokhotlong District					I-1953	L.C.C. Liedenberg 5871 (PRE)	1
Carex burkei (C.B. Clarke) Luceño & Martín-Bravo	Lesotho: Qacha's Nek District, Sehlabathebe NP	-29.9	29.1			22-I-1995	J. Browning 689 (NU)	1
Carex burkei (C.B. Clarke) Luceño & Martín-Bravo	Lesotho: Thaba-Tseka District, 47.7 km SW of Thaba-Tseka near the Lesobeng area	-29.807778	28.373611	2875 m.	long, high exposed ridge, montane grassland, dark brown basaltic loam	29-II-1990	L. Smook 7127 (PRE)	1
Carex burkei (C.B. Clarke) Luceño & Martín-Bravo	South Africa: Eastern Cape Province, Barkly East District, Ben McDhui	-30.649167	27.935833	c. 8400 ft.	on grass and rock bank above stream	4-II-1983	O.M. Hillard & B.L. Burtt 16399 (NU)	1
Carex burkei (C.B. Clarke) Luceño & Martín-Bravo	South Africa: Eastern Cape Province, Barkly East District, old Lady Grey road, above Kraai river	-30.957222	27.459722	5600 ft.	base of cliff	29-XI-1981	O.M. Hillard & B.L. Burtt 14572 (NU)	1
Carex burkei (C.B. Clarke) Luceño & Martín-Bravo	South Africa: Eastern Cape Province, Barkly East District, Witteberg, Beddgelert	-30.760833	27.555833	c. 6200 ft.	rocky dolerite slope	1-XII-1981	O.M. Hillard & B.L. Burtt 14588 (NU)	1
Carex burkei (C.B. Clarke) Luceño & Martín-Bravo	South Africa: Eastern Cape Province, Cathcart	-32.303333	27.102222	c. 5200 ft.	tufted, on streamside	8-XII-1981	O.M. Hillard & B.L. Burtt 14776 (NU)	1
Carex burkei (C.B. Clarke) Luceño & Martín-Bravo	South Africa: Eastern Cape Province, Cradock District, National Bergkwagga Park, nearly on top of Bank Mountain	-32.28	25.44	1750 m.		6-III-1963	L.C.C. Liebenberg 7114 (PRE)	1
Carex burkei (C.B. Clarke) Luceño & Martín-Bravo	South Africa: Eastern Cape Province, Elliot District, Barkly Pass	-31.215556	27.845278	6500 ft.	stony earth slope in gully	29-XI-1982	O.M. Hillard & B.L. Burtt 14555 (NU)	1
Carex burkei (C.B. Clarke) Luceño & Martín-Bravo	South Africa: Eastern Cape Province, Koueveldberge, Onbedacht farm			1600 m.	in shade of bush	21-XI-2006	V.R. Clark 157 & R. Te Water Naude (GRA)	1
Carex burkei (C.B. Clarke) Luceño & Martín-Bravo	South Africa: Eastern Cape Province, Lady Grey District, Jouberts pass	-30.715306	27.27	2500 m.	basalt	17-I1970	M.J.A. Werger 1059 (PRE)	1
Carex burkei (C.B. Clarke) Luceño & Martín-Bravo	South Africa: Eastern Cape Province, Middelburg, Gordonville			c. 5500 ft.		13-XI-1952	J.P.H. Acocks 16569 (PRE)	1
Carex burkei (C.B. Clarke) Luceño & Martín-Bravo	South Africa: Eastern Cape Province, Molteno District, Stormberg, Vlakfontein 12 farm	-31.260833	26.556667	2020 m.	cliffs	07-XII-2010	V.R. Clark 187 & R.J. Daniels (GRA)	1
Carex burkei (C.B. Clarke) Luceño & Martín-Bravo	South Africa: Eastern Cape Province, Sneeuberg, SE side of the Wapadsberg pass	-31.884167	24.921389	2041 m.	at cliff-base	12-XII-2007	V.R. Clark 120 & C. Pienaar (GRA)	1
Carex burkei (C.B. Clarke) Luceño & Martín-Bravo	South Africa: Eastern Cape Province, Sneeuberg, Kruygers Baaken	-31.72	24.53	1880 m.	grassland in slope	15-II-2006	V.R. Clark 99 et al. (UPOS)	1
Carex burkei (C.B. Clarke) Luceño & Martín-Bravo	South Africa: Eastern Cape Province, Stormberg District					17-XII-1832	Drège 73992 (P)	1
Carex burkei (C.B. Clarke) Luceño & Martín-Bravo	South Africa: Eastern Cape Province, Tarkastad District, top of Martha mountain	-32.09722	26.347222	1923 m.	open stony area on plateau	06-XII-2010	V.R. Clark 43 & R.J. Daniels (GRA)	1
Carex burkei (C.B. Clarke) Luceño & Martín-Bravo	South Africa: Free State Province, Golden Gate Highlands National Park	-28.509281	28.618000	1800-2100 m.	grassland in Leucosidea sericea scrub	13-XII-2008	S. Martín-Bravo 144SMB08 et al. (UPOS)	1
Carex burkei (C.B. Clarke) Luceño & Martín-Bravo	South Africa: Free State Province, Golden Gate Highlands National Park, between Calrens and Phuthaditjhaba, trail that starts from Glen Reenen Rest Camp to Echo Ravine Trail	-28.50097	28.621577	2035 m.	rocky understory	20-I-2014	T. Villaverde 135TVH14 et al. (UPOS)	1
Carex burkei (C.B. Clarke) Luceño & Martín-Bravo	South Africa: Free Stare Province, Golden Gate Highlands National Park, between Calrens and Phuthaditjhaba, trail that starts from Glen Reenen Rest Camp to Echo Ravine Trail	-28.50097	28.621577	2040 m.	dry field	20-I-2014	T. Villaverde 133TVH14 et al. (UPOS)	1
Carex burkei (C.B. Clarke) Luceño & Martín-Bravo	South Africa: Free State Province, Golden Gate Highlands National Park, Glen Reenen	-28.502222	28.621528	1993 m.	dry fields in open areas of Leucoidea sericea burned scrub	15-XI-2010	M. Luceño 41ML10 & S. Martín-Bravo (UPOS)	1
Carex burkei (C.B. Clarke) Luceño & Martín-Bravo	South Africa: Free State Province, Harrismith, Sentinel Peak	-28.7428	28.8903	2900 m.	grassland, full sun, sandy/organic soil	III-1975	T.H. Arnold 853 (PRE)	1
Carex burkei (C.B. Clarke) Luceño & Martín-Bravo	South Africa: Free State Province, Zastron, Aasvoëlkrang	-30.300278	27.049444	6800 ft.	growing amongst grassland	6-XII-1973	N.A. Ferreira F097 (K, PRE)	2
Carex burkei (C.B. Clarke) Luceño & Martín-Bravo	South Africa: KwaZulu-Natal Province, Bergville District, Cathedral Peak Forest Station	-28.932141	29.177410	c. 6000 ft.	damp ground on base of cliff	5-IX-1985	O.M. Hillard & B.L. Burtt 18577 (NU)	1
Carex burkei (C.B. Clarke) Luceño & Martín-Bravo	South Africa: KwaZulu-Natal Province, Bergville District, Cathedral Peak Forest Station	-28.932141	29.177410	6800 ft.	fairly frequent in Pentochistis sp. grassland	27-XI-1952	D.J.B. Killick 11798 (K)	1
Carex burkei (C.B. Clarke) Luceño & Martín-Bravo	South Africa: KwaZulu-Natal Province, Bushman's Nek Area, Caravan Park near Wildlife Services Centre, close to the little waterfall	-29.846306	29.215889	1705 m.	shaddy slope	14-X-2006	B. Gehrke BG-Af 452 (Z)	1
Carex burkei (C.B. Clarke) Luceño & Martín-Bravo	South Africa: KwaZulu-Natal Province, Cathedral Peak	-28.9877	29.2192	1907 m.	grassland	15-I-2008	A.M. Muasya 3721 & C.H. Stirton (BOL, UPOS)	2
Carex burkei (C.B. Clarke) Luceño & Martín-Bravo	South Africa: KwaZulu-Natal Province, Drakensberg mountain range, Vathedral Peak, Mlambonja Wilderness Area, Cathedral Peak ascent, on Barker's chalet	-28.944667	29.199778	1440 m.	grassland with Pteridium aquilinum, river basin, path's edge	17-XI-2010	S. Martín-Bravo 127SMB10 & M. Luceño (UPOS)	1
Carex burkei (C.B. Clarke) Luceño & Martín-Bravo	South Africa: KwaZulu-Natal Province, Drakensberg, path to Sani Pass, Noman's Land	-29.597583	29.310333	2258 m.	slope in Leucosidea sericea scrub	21-XI-2010	S. Martín-Bravo 158SMB10 et al. (UPOS)	1
Carex burkei (C.B. Clarke) Luceño & Martín-Bravo	South Africa: KwaZulu-Natal Province, Garden Castle Forest Reserve	-29.750305	29.211972	1803 m.	stream edge	16-XI-2012	E. Maguilla et. al. 83EMS12 (UPOS)	1
Carex burkei (C.B. Clarke) Luceño & Martín-Bravo	South Africa: KwaZulu-Natal Province, Golden Gate National Park	-28.508333	28.618333	1844 m.	recently burned area with many Leucosidea sericea bushes	12-X-2006	B. Gehrke et al. BG-Af 480 (Z)	1
Carex burkei (C.B. Clarke) Luceño & Martín-Bravo	South Africa: KwaZulu-Natal Province, Maloti-Drakensberg Park World Heritage site, Monks Cowl	-29.059361	29.393667	1725 m.	grassland	14-XII-2008	M. Luceño 79ML08 et al. (UPOS)	1
Carex burkei (C.B. Clarke) Luceño & Martín-Bravo	South Africa: KwaZulu-Natal Province, Mpendhle District, Mulangane, above Carter's Nek	-29.370833	29.5334722	c. 6700 ft.		20-XI-1985	O.M. Hillard & B.L. Burtt 18639 (NU)	1
Carex burkei (C.B. Clarke) Luceño & Martín-Bravo	South Africa: KwaZulu-Natal Province, Mont-aux-Source area, close to the Witsieshoek Mountain Resort	-28.688889	28.8975	2180 m.	northern slope, in short grassland and loose stands along rocky outcrop	20-X-2006	B. Gehrke BG-Af 474 (Z)	1
Carex burkei (C.B. Clarke) Luceño & Martín-Bravo	South Africa: KwaZulu-Natal Province, Mpendhle District, Mulangane, above Carters Nek	-29.370833	29.5334722	c. 6700 ft.	streamside in gully	20-XI-1985	O.M. Hillard & B.L. Burtt 18639 (P)	1
Carex burkei (C.B. Clarke) Luceño & Martín-Bravo	South Africa: KwaZulu-Natal Province, Underberg District, Chameleon Cave area, 5 miles N. of Castle View Farm	-29.075556	29.373056	7500 ft.	damp grass path by stream	04-XII-1984	O.M. Hillard & B.L. Burtt 17872 (K)	1
Carex burkei (C.B. Clarke) Luceño & Martín-Bravo	South Africa: KwaZulu-Natal Province, Underberg District, Cobham Forest Reserve, 'Lakes' cave area	-29.6567	29.3676	7900 ft.	hill slopes in basalt	15-XII-1982	O.M. Hillard & B.L. Burtt 16056 (P)	1
Carex burkei (C.B. Clarke) Luceño & Martín-Bravo	South Africa: KwaZulu-Natal Province, Underberg District, Gxalingenwa Valley, between Sani Pass and Polela Valley	-29.594167	29.302222	c. 7200 ft.	drainage line on hillslope	09-XII-1983	O.M. Hillard & B.L. Burtt 17115 (K)	1
Carex burkei (C.B. Clarke) Luceño & Martín-Bravo	South Africa: KwaZulu-Natal Province, Underberg District, Gxalingenwa Valley, between Sani Pass and Polela Valley	-29.594167	29.302222	c. 7200 ft.	drainage line on hillslope	09-XII-1983	O.M. Hillard & B.L. Burtt 17115 (NU)	1
Carex burkei (C.B. Clarke) Luceño & Martín-Bravo	South Africa: KwaZulu-Natal Province, Underberg District, upper tributaries S of Mkomazi river (feeders of Ka-Ntubu)	-29.526667	29.319722	7300 ft.	in drainage line on steep grass slopes	1-XII-1982	O.M. Hillard & B.L. Burtt 15759 (NU)	1
Carex burkei (C.B. Clarke) Luceño & Martín-Bravo	South Africa: KwaZulu-Natal Province, Underberg District, upper tributaries S of Mkomazi river (feeders of Ka-Ntubu)	-29.526667	29.319722	8000 ft.	common in bulden bed	02-XII-1982	O.M. Hillard & B.L. Burtt 14508 (P)	1
Carex burkei (C.B. Clarke) Luceño & Martín-Bravo	South Africa: KwaZulu-Natal Province, Drakensberg mountain range, Cathedral Peak, Mlambonja, Wilderness area, ascent trial to Cathedral peak	-28.9449	29.2997		grassland in Leucosidea sericea scrub	14-XI-2011	S. Martín- Bravo 125SMB11 et al. (UPOS)	1
Carex burkei (C.B. Clarke) Luceño & Martín-Bravo	South Africa: Western Cape Province, Highlands Cape Colony Game Reserve, Beaufort West	-32.152889	22.601389	1844 m.	in cliffs on edge of plateau	04-III-2008	V.R. Clark 51 & R. Cerros (GRA)	1
Carex cf. burkei (C.B. Clarke) Luceño & Martín-Bravo	South Africa: Western Cape Province, Karoo National Park, Beaufort West, "Puttersvlei Peak"	-32.271944	22.497500	1910 m.	escarpment edge near communication towers	07-III-2008	V.R. Clark 374 & R. Cerros (GRA)	1
Carex capensis Thunb.	South Africa: Cape region						Thunberg s.n. (UPS-21777) holotype	1
Carex capensis Thunb.	South Africa: "In Cape buona Spei"						Ecklon 813 (C-10000624) lectotype of C. bisexualis	1
Carex capensis Thunb.	South Africa: Western Cape Province, "near Cape Town"						Pappe (K-000693803) syntype of C. bisexualis	1
Carex capensis Thunb.	South Africa: Western Cape Province, Swellendam Div., near Swellendam			500-2000 ft.			Zeyher 4441 (K000693804) lectotype of Carex zeyheri; (FI-001040), (LE000434), (P-00540798 and 00540799), (E-00286073), (S-10-1167) isotypes	7
Carex capensis Thunb.	South Africa: Eastern Cape Province, Uitenhage, Grassrug, Kalksteinhaltige, grasreiche flächen & Hügelsnischen, Koega & Zondagsrivier			500-1000 ft.		15-VIII	Ecklon & Zeyher s.n. (S-101142) syntype of S. ecklonii	1
Carex capensis Thunb.	South Africa: Eastern Cape Province, Zwartkopsrivier					VIII	Ecklon & Zeyher 4440 (SAM-0023405, second specimen from the left in the upper middle half) syntype of S. ecklonii	1
Carex capensis Thunb.	South Africa: Eastern Cape Province, Baviaanskloof	-33.53088	24.06229			12-X-2016		1	https://www.inaturalist.org/observations/20175666
Carex capensis Thunb.	South Africa: Eastern Cape Province, Cacadu	-33.060124	23.712587			16-XI-2019		1	https://www.inaturalist.org/observations/35816159
Carex capensis Thunb.	South Africa: Western Cape Province			40 ft.	open grassy places	VII-1937	M.R. Levyns 6265 (K)	1
Carex capensis Thunb.	South Africa: Western Cape Province	-33.05	18.916667	250 ft.		16-IX-1892	R. Schlechter 7230 (BOL)	1
Carex capensis Thunb.	South Africa: Western Cape Province						Heyler 4979 (BOL)	1
Carex capensis Thunb.	South Africa: Western Cape Province	-34.342017	21.407477	100 ft.	limestone hills	05-XI-1949	M.R. Levyns 9518 (BOL)	1
Carex capensis Thunb.	South Africa: Western Cape Province			150 ft.		10-XI-1894	R. Schlechter 5920 (BOL)	1
Carex capensis Thunb.	South Africa: Western Cape Province	-34.355307	18.475895				P-01671245	1
Carex capensis Thunb.	South Africa: Western Cape Province	-33.351573	19.141818			04-XI-1829	Drége 2033a (P)	1
Carex capensis Thunb.	South Africa: Western Cape Province, between Seapoint and Clifton	-33.929167	18.391944	c. 40 ft.		VII-1926	C.A. Smith 2899 (PRE)	1
Carex capensis Thunb.	South Africa: Western Cape Province, Bredasdorp, N. side of Portberg	-34.556944	20.041111	c. 600 ft.	renosterveld ex fynbos, rare, very abundant	27-VII-1962	J.P.H. Acocks 22492 (K)	1
Carex capensis Thunb.	South Africa: Western Cape Province, Caledon District			1170 ft.		22-VIII-1962	H.C. Taylor 3760	1
Carex capensis Thunb.	South Africa: Western Cape Province, Caledon, W of Riedpoel Stn.	-34.202778	19.388889	6 m.	coastal renosterveld	22-VIII-1962	J.P.H. Acocks 22581(K)	1
Carex capensis Thunb.	South Africa: Western Cape Province, Camps Bay	-33.955047	18.394643	600 ft.	slopes	20-VIII-1944	M.R. Levyns 7697 (BOL)	1
Carex capensis Thunb.	South Africa: Western Cape Province, Camps Bay	-33.955047	18.394643	800 ft.	slopes occ.	17-VIII-1936	M.R. Levyns 5840 (BOL)	1
Carex capensis Thunb.	South Africa: Western Cape Province, Cap de Bonne Espérance	-34.349444	18.481667				(P-01671245)	1
Carex capensis Thunb.	South Africa: Western Cape Province, Cap de Bonne Espérance	-34.349444	18.481667				Drége (P-01671244)	1
Carex capensis Thunb.	South Africa: Western Cape Province, Cape Peninsula	-34.1	18.3			25-VIII-1919	N.S. Pillans 3898 (PRE)	1
Carex capensis Thunb.	South Africa: Western Cape Province, Cape Peninsula, Constantiaberg	-34.050248	18.375882		on lower W slopes above Hout Bay, in brown sand	08-VIII-1974	E. Esterhuysen 33593a (BOL)	1
Carex capensis Thunb.	South Africa: Western Cape Province, Cape Peninsula, near housing estate above Camps Bay	-33.955047	18.394643		on granits slopes in stony clayey-sandy soil	01-X-1975	E. Esterhuysen 33992a (BOL)	1
Carex capensis Thunb.	South Africa: Western Cape Province, Cape Peninsula, slopes near signal station					21-VIII-1897	A.H. Wolley Dod. 2456 (BOL)	1
Carex capensis Thunb.	South Africa: Western Cape Province, Cape Town, Langverwaght above Kuilsrivier, main kloof	-33.919444	18.694722	725 m.	sandy, stone slope	11-XIII-1973	E.G.H. Oliver 4357 (PRE)	1
Carex capensis Thunb.	South Africa: Western Cape Province, Cape Town, Morgenster, on slopes of Kanonpop near Durbanville	-33.87	18.696389		in clay soil	17-X-1975	E. Esterhuysen 33972 (BOL)	1
Carex capensis Thunb.	South Africa: Western Cape Province, Humansdorp			200 ft.		X-1928	H.G. Fourcade 3983 (BOL)	1
Carex capensis Thunb.	South Africa: Western Cape Province, Humansdorp	-33.999132	24.781153			05-X-2018		1	https://www.inaturalist.org/observations/17213129
Carex capensis Thunb.	South Africa: Western Cape Province, Jeville District	-33.935342	18.389064			22-II-1972	P-01671248	1
Carex capensis Thunb.	South Africa: Western Cape Province, Kleinrivesberg	-34.412715	19.457572		in rupestribus montis		Ecklon (P-01671246)	1
Carex capensis Thunb.	South Africa: Western Cape Province, Llandudno, upper slopes of Llandudno, West-facing coastal slopes	-34.010833	18.343333		small tufts among grass and fynbos vegetation	13-IX-1982	P. Bond 1727 & E. Esterhuysen (PRE)	1
Carex capensis Thunb.	South Africa: Western Cape Province, Malmesbury, C. 20 miles along the road to Malmesbury after the turn-off from [N9]				in hard sand	02-X-1973	E. Esterhuysen 33248 (BOL)	1
Carex capensis Thunb.	South Africa: Western Cape Province, Millers Point	-34.23195	18.472962		burned slopes	1-VIII-1949	M. Macnae 9412 (BOL)	1
Carex capensis Thunb.	South Africa: Western Cape Province, Mossel Bay, sand track to Godwana Game Reserve	-34.100314	21.906331	325 m.	open fields dominated by Barbotia macrospatha	14-X-2017	J.I. Márquez-Corro 172JMC17, 176JMC17, 179JMC17, 180JMC17, 181JMC17, 182JMC17 et al. (UPOS)	6
Carex capensis Thunb.	South Africa: Western Cape Province, Oudekraal	-33.989479	18.371341	50 ft.		26-VII-1937	M.R. Levyns 6265 (BOL)	1
Carex capensis Thunb.	South Africa: Western Cape Province, Oudekraal	-33.989479	18.371341	50 ft.	roadside	30-VIII-1936	M.R. Levyns 5874 (BOL)	1
Carex capensis Thunb.	South Africa: Western Cape Province, Oudekraal, beyond Camps Bay	-33.975833	18.370556			25-VII-1937	M.R. Levyns 5874 (P)	1
Carex capensis Thunb.	South Africa: Western Cape Province, Pipe Track	-33.955047	18.394643	500 ft.	gravelly slopes	06-X-1924	M.R. Levyns (BOL)	1
Carex capensis Thunb.	South Africa: Western Cape Province, Riversdale	-34.011289	21.239444	800 ft.	on hills	VII-1924	J. Muir 3320 (PRE)	1
Carex capensis Thunb.	South Africa: Western Cape Province, Stellenbosch Division	-33.955047	18.394643	200 m.	lower slopes of the Helderberg Circa	31-VIII-1947	P.N. Parker 4232 (BOL)	1
Carex capensis Thunb.	South Africa: Western Cape Province, Somerset West, Stellenbosch Division	-34.075866	18.843359		gravelly clay soils	22-VIII-1941	P.N. Parker 3587 (BOL)	1
Carex capensis Thunb.	South Africa: Western Cape Province, Somerset West, Stelenbosch Division	-34.030833	18.846389	200 m.	lower slopes of the Helderberg Circa	31-VIII-1947	P.N. Parker 4232 (K)	1
Carex capensis Thunb.	South Africa: Western Cape Province, Still Bay, Pauline Bohnen Nature Reserve	-34.35144	21.42767			25-VII-2014		1	https://www.inaturalist.org/observations/10997076
Carex capensis Thunb.	South Africa: Western Cape Province, Still Bay, Still Bay East	-34.351829	21.427261			16-IX-2020		1	https://www.inaturalist.org/observations/61780353
Carex capensis Thunb.	South Africa: Western Cape Province, Swartberg, below Towerkop on Bob Reinekes Farm	-33.916667	21.283333	420 m.	fynbos	01-VII-2006	A.M. Muasya 2917 (BOL, UPOS)	2
Carex capensis Thunb.	South Africa: Western Cape Province, Swellendam, Nr. Zuurbraak, to W.	-34.074722	20.678056	c. 500 ft.	veld of N aspect	05- IX-1951	J.P.H. Acocks 16078 (PRE)	1
Carex capensis Thunb.	South Africa: Western Cape Province, Tafelberg	-33.962.894	18.409805	600 ft.		07-XII-1832	Drège 7399b (P)	1
Carex capensis Thunb.	South Africa: Western Cape Province, Uitenhage, In Pinguibus udis between Koegarivier and Zondergrivier	-33.739746	25.697316	500-1000 ft.			Zeyher et Ecklon (P-01671249)	1
Carex capensis x sciocapensis	South Africa: Eastern Cape Province, Adelaide District, Farms Glamorgan	-32.36	26.38	1883 m.	grassland in open scrub on dolerite	20-I-2009	V.R. Clark 153 et al. (BOL)	1
Carex capensis x sciocapensis	South Africa: Eastern Cape Province, Humansdorp, Witte els Bosch	-34.02	23.95		bare grounds on flats	10-IX-1928	J.B. Gillett 2244 (BOL)	1
Carex capensis x sciocapensis	South Africa: Eastern Cape Province, Ladismith, Branderoynskuil	-33.4	21.2			17-VIII-1975	E. Esterhuysen 33907 (BOL)	1
Carex capensis x sciocapensis	South Africa: Eastern Cape Province, Llandudno, along old path toward Sandy Bay	-34.01	18.34		on granite slope	14-IX-1974	E. Esterhuysen 33817 (BOL)	1
Carex capensis x sciocapensis	South Africa: Western Cape Province, Karbonkelsberg	-34.04	18.32	1000-1500 ft.	stony slopes	21-VII-1974	E. Esterhuysen 33588 (BOL)	1
Carex capensis x sciocapensis	South Africa: Western Cape Province, Kannaland, Towerkop Nature Reserve, near Seweweekspoortrivier	-33.386213	21.408696	904-968 m.	under bushes	12-X-2017	J.I. Márquez-Corro 141JMC17, 154JMC17, 155JMC17 et al. (UPOS)	3
Carex chemerzonii Luceño & Martín-Bravo	Madagascar: Diana region, Mount Tsaratanana	-14.042222	48.969167	2500 m.		X-1919	H. Perrier de la Bâthie 2502 (P-00536708) holotype	1
Carex distincta (Kukkonen) Luceño & Martín-Bravo	Lesotho: Mokhotlong Province, between Indumeni Dome and Castle Buttress			9800 ft.	alpine grassland in summit	10-XII-1957	Killick 2274 (BM-000922721) holotype; (K-000363524), (PRE-0107831) isotypes	3
Carex distincta (Kukkonen) Luceño & Martín-Bravo	Lesotho: Maseru District, Semonkong-Roma road	-29.670913	27.922406	2422 m.	Helichrysum scrub	16-I-2014	T. Villaverde 81TVH14 et al. (UPOS)	1
Carex distincta (Kukkonen) Luceño & Martín-Bravo	Lesotho: Leribe District, Hlotse	-29.071707	28.376685	2611 m.	wet basalt	13-I-2014	T. Villaverde 8TVH14 et al. (UPOS)	1
Carex distincta (Kukkonen) Luceño & Martín-Bravo	Lesotho: Leribe District, Hlotse	-29.071707	28.376685	2611 m.	wet basalt	13-I-2014	T. Villaverde 12TVH14 et al. (UPOS)	1
Carex distincta (Kukkonen) Luceño & Martín-Bravo	Lesotho: Leribe District, Hlotse	-29.071707	28.376685	2612 m.	wet basalt	13-I-2014	T. Villaverde 3TVH14, 14TVH14, 15TVH14 et al. (UPOS)	3
Carex distincta (Kukkonen) Luceño & Martín-Bravo	Lesotho: Leribe District, Hlotse				in fine grass clump on river bank	10-XII-1991	J. Browning 443 (NU)	1
Carex distincta (Kukkonen) Luceño & Martín-Bravo	Lesotho: Leribe District, Pitseng	-29.073385	28.381816	2650 m.	dry grassland	14-I-2014	T. Villaverde 41TVH14 et al. (UPOS)	1
Carex distincta (Kukkonen) Luceño & Martín-Bravo	Lesotho: Leribe District, Pitseng	-29.073385	28.381816	2650 m.	dry grassland	14-I-2014	T. Villaverde 47TVH14 et al. (UPOS)	1
Carex distincta (Kukkonen) Luceño & Martín-Bravo	Lesotho: Leribe District, Pitseng, Mafika Lisiu Pass, North side of the road that going up to the top, left side	-29.0773	28.3818	2650 m.	dry meadow	14-I-2014	T. Villaverde 44TVH14 et al. (UPOS)	1
Carex distincta (Kukkonen) Luceño & Martín-Bravo	Lesotho: Maseru District, between Roma and Semonkong	-29.727292	27.949147	2919 m.	basalt crevice	16-I-2014	T. Villaverde 102TVH14 et al. (UPOS)	1
Carex distincta (Kukkonen) Luceño & Martín-Bravo	Lesotho: Maseru District, between Roma and Semonkong	-29.727764	27.945831	2803 m.	stony grassland	16-I-2014	T. Villaverde 99TVH14 et al. (UPOS)	1
Carex distincta (Kukkonen) Luceño & Martín-Bravo	Lesotho: Maseru District, between Roma and Semonkong	-29.700452	27.947417	2620 m.	stony grassland on basalt	16-I-2014	T. Villaverde 91TVH14 et al. (UPOS)	1
Carex distincta (Kukkonen) Luceño & Martín-Bravo	Lesotho: Maseru District, Semonkong-Roma road	-29.706756	27.945538	2667 m.	clearing of Helichrysum scrub	19-I-2014	T. Villaverde 132TVH14 et al. (UPOS)	1
Carex distincta (Kukkonen) Luceño & Martín-Bravo	Lesotho: Maseru District, Semonkong-Roma road	-29.758754	27.993641	2569 m.	clearing of Helichrysum scrub	18-I-2014	T. Villaverde 121TVH14 et al. (UPOS)	1
Carex distincta (Kukkonen) Luceño & Martín-Bravo	Lesotho: Mokhotlong District, Indumeni Dome, Castle Buttress	-29.005645	29.179959	9800 ft.	alpine grassland on summit of Drakensberg	10-XII-1957	D.J.B Killick 2272 (PRE)	1
Carex distincta (Kukkonen) Luceño & Martín-Bravo	Lesotho: Qacha's Nek District, Sehlabathebe, Range Management Education Centre	-29.884995	29.081450		below rock edge	31-V-1995	J. Brownig 722 (NU)	1
Carex distincta (Kukkonen) Luceño & Martín-Bravo	South Africa: Eastern Cape Province, Graaff-Reinet region, eastern slopes of the Toorberg	-32.14	24.524	1860 m	shaded scarpment cliffs in Fynbos	17-XII-2007	V.R. Clark 493 & C. Pienaar (GRA)	1
Carex distincta (Kukkonen) Luceño & Martín-Bravo	South Africa: Eastern Cape Province, Barkly East, New England	-30.78	27.53	2100 m.	grassland in summit	ca. 1941	P. Joubert s.n. (PRE-39026)	1
Carex distincta (Kukkonen) Luceño & Martín-Bravo	South Africa: Eastern Cape Province, Queenstown, summit of Hangslip Mount	-31.7306	26.7831	6545 ft.	grassland in summit	31-XII-1962	B.R. Roberts 2057 (PRE)	1
Carex distincta (Kukkonen) Luceño & Martín-Bravo	South Africa: Eastern Cape Province, near Tiffindell Ski Resort	-30.6463	27.9228	2950 m.	grassland	17-I-2008	C. Aedo 15.204 et al. (MA)	1
Carex distincta (Kukkonen) Luceño & Martín-Bravo	South Africa: KwaZulu-Natal Province, Estcourt District, Bushman Pass	-29.873613	29.164338	7200-9000 ft.	alpine grassland	22-I-1940	O. West 1660 (PRE)	1
Carex distincta (Kukkonen) Luceño & Martín-Bravo	South Africa: KwaZulu-Natal Province, Estcourt District, Giant Castle mountain hut	-29.336058	29.499348	7400 ft.		2-XII-1968	F.B Wricht 738 (NU)	1
Carex distincta (Kukkonen) Luceño & Martín-Bravo	South Africa: KwaZulu-Natal Province, Ukhahlamba Drakensberg Park, Bushman's Nek, near Shelabathebe	-29.87833	29.14555	2430 m.	rocky outcrop	19-XII-2008	B. Gehrke BG570 & M. Pirie (UPOS)	1
Carex distincta (Kukkonen) Luceño & Martín-Bravo	South Africa: KwaZulu-Natal Province, Ukhahlamba Drakensberg Park, Cathedral Peak	-28.92361	29.13861	2623 m.	open grassland	20-XII-2008	B. Gehrke BG574 & M. Pirie (UPOS)	1
Carex distincta (Kukkonen) Luceño & Martín-Bravo	South Africa: KwaZulu-Natal Province, Underberg District, 5-7 miles NNW of Castle Vien Farm, headwaters of Mlahlangubo river	-29.457711	29.395818	6800 ft.	grassland at edge of cave sandstone	25-XI-1980	O.M. Hilliard & B.L Burtt 13634 (NU)	1
Carex distincta (Kukkonen) Luceño & Martín-Bravo	South Africa: KwaZulu-Natal Province, Underberg District, vicinity of Tarn Cave, above Bushman's Nek	-29.839240	29.237573	7800 ft.	in crack in Cave Sandstone cliff	22-I-1988	O.M. Hilliard & B.L Burtt 17492 (NU)	1
Carex distincta (Kukkonen) Luceño & Martín-Bravo	South Africa: KwaZulu-Natal Province, Underberg District, Chameleon cave area, C. 5 miles N of Castle View farm	-29.717590	29.299415	6800 ft	mats on damp rocks under overhang	2-XII-1984	O.M. Hilliard & B.L Burtt 17802 (K, NU)	2
Carex distincta (Kukkonen) Luceño & Martín-Bravo	South Africa: KwaZulu-Natal Province, Underberg District, Chameleon Cave area, c. 5 miles N. of Castle View farm	-29.713714	29.304833	7000 ft.	cliff and grass slopes	1-XII-1984	O.M. Hilliard & B.L Burtt 17772 (NU)	1
Carex distincta (Kukkonen) Luceño & Martín-Bravo	South Africa: KwaZulu-Natal Province, Underberg District, Chameleon Cave area, c. 5 miles N. of Castle View farm				among rocks in stream valley	4-XII-1984	O.M. Hilliard & B.L Burtt 17862 (NU)	1
Carex distincta (Kukkonen) Luceño & Martín-Bravo	South Africa: KwaZulu-Natal Province, Underberg District, Cobham Forest Reserve, Sipongweni	-29.671197	29.405692	6500 ft.	under Leucosidea wround large rock outerop	22-II-1981	O.M. Hilliard & B.L Burtt 14122 (NU)	1
Carex distincta (Kukkonen) Luceño & Martín-Bravo	South Africa: KwaZulu-Natal Province, Underberg District, upper tributaries S of Mkomazi R. (feeders of Ka-Ntubu)	-29.523924	29.385672	7600 ft.	moist places	4-XII-1982	O.M. Hilliard & B.L Burtt 15872 (NU)	1
Carex distincta (Kukkonen) Luceño & Martín-Bravo	South Africa: KwaZulu-Natal Province, Underberg District, Gxalingenwa Valley, between Sani Pass and Polela Valley	-29.60993	29.36850	7300 ft.	in dolerite cliff	9-XII-1983	O.M. Hilliard & B.L Burtt 17118 (NU)	1
Carex distincta (Kukkonen) Luceño & Martín-Bravo	South Africa: Western Cape Province, Nuweveldberge	-32.2287	22.4163	1775 m.	open shrubland	8-III-2008	V.R. Clark 394 & R. Cerros (BOL)	1
Carex dregeana Kunth	South Africa: Eastern Cape Province, Zuurbergen, Bontjesrivier-Strubels						Drège 2033a (P-00540802) lectotype	1
Carex dregeana Kunth	South Africa: Eastern Cape Province, Zuurberg range, Alexandria Div.			2000-3000 ft.			Drège 1040 (K-000693805) syntype	1
Carex dregeana Kunth	South Africa: Eastern Cape Province, Zuurberg range, Alexandria Div.			2000-3000 ft.			Drège s.n. (K-00363530) syntype	1
Carex dregeana Kunth	South Africa: Port Natal et Afrique meridionale						Drège s.n. (G-00195307) syntype	1
Carex dregeana Kunth	South Africa: Western Cape Province, Swellendam			1000-4000 ft.			Ecklon & Zeyher 4440 (K-000693807), (FI-001038), (SAM-0023405, specimen in the left half)	3
Carex dregeana Kunth	Angola: Bengella Province, between Ganda and Caconda	-13.11	14.85	1700 m.	grassy slope	10-XI-1933	O. Hundt 713 (P)	1
Carex dregeana Kunth	Eswatini: Hhohho District, Malolotja Nature Reserve	-26.15	31.09	4500 ft.		29-XI-1963	RH. Compton 31810 (PRE)	1
Carex dregeana Kunth	Kenya: Trans Nzoia County, Kitale	-1.04	34.94	6200 ft.	wooded grassland	7-V-1953	A. Bogdan AB3723 (EA)	1
Carex dregeana Kunth	Lesotho: Leribe District, Pitseng	-29.062077	28.362619	2359 m.	road side near wet basalt	14-I-2014	T. Villaverde 48TVH14 et al. (UPOS)	1
Carex dregeana Kunth	Lesotho: Leribe District, Pitseng	-29.06925	28.391694	2821 m.	road side	14-I-2014	T. Villaverde 38TVH14 et al. (UPOS)	1
Carex dregeana Kunth	Lesotho: Qachas's Nek District, Shelabathebe NP, Kubutsane junction	-29.88	29.07	2430 m	mixed grass- and sedgeveld, wet soil	24-II-1976	A.C. Beverly 582 & F.K. Hoener (NU)	1
Carex dregeana Kunth	Madagascar: Fianarantsoa Province, Andringitra NP	-22.126805	46.888611	1628 m.	shaddy road side	13-III-2006	B. Gehrke BG-Af 275 et al. (Z)	1
Carex dregeana Kunth	Madagascar: Fianarantsoa Province, Andringitra NP, Diavolana Trail	-22.1251	46.8824	1835 m.	grassy patches between rocks	18-IV-2010	I. Larridon et al. 0129-2010 (BOL, GENT, TAN, UPOS)	4
Carex dregeana Kunth	South Africa: Eastern Cape Province, 5 km N of Herold Bay on road to George	-34.00	22.38	200 m.	disturbed, grassy roadside among cultivated fields	8-X-1987	G. Davidse 33726 (BOL)	1
Carex dregeana Kunth	South Africa: Eastern Cape Province, Adelaide/Fort Beaufort District, Great Winterberg, "The Ruitjies", Snowdale 357 farm	-32.367222	26.547500	1772 m.	vast valley-head wetland on summit plateau	19-III-2011	V.R. Clark 116 & G. Neef (GRA)	1
Carex dregeana Kunth	South Africa: Eastern Cape Province, Adelaide/Tarkastad District, Great Winterberg, Quaggas Hoek 199 farm	-32.3425	26.204278	1736 m.	N-facing rock outcrops, grassland	07-III-2011	V.R. Clark 6 & V. van der Merwe (GRA)	1
Carex dregeana Kunth	South Africa: Eastern Cape Province, between Bontjesrivier and Strubels					04-XI-1829	Drège 2033a (P)	1
Carex dregeana Kunth	South Africa: Eastern Cape Province, between Grahamstown and Port Alfred, towards East London, Shaw Park near Fish River Lighthouse	-33.500277	27.068472		wet meadow, in standing water	09-X-2006	B. Gehrke BG-Af 432 (Z)	1
Carex dregeana Kunth	South Africa: Eastern Cape Province, Engcobo District, just outside Engcobo on road to Umtata	-31.57	28.77	3000 ft.	sounveld	08-II-1953	Killick and Marais 2053 (PRE)	1
Carex dregeana Kunth	South Africa: Eastern Cape Province, Grahamstown					XII-1903	M. Daly 634 (BOL)	1
Carex dregeana Kunth	South Africa: Eastern Cape Province, Humansdorp	-34.00	24.77	228 m.		X-1925	Schenl. 3135 (BOL)	1
Carex dregeana Kunth	South Africa: Eastern Cape Province, Humansdorp, Witte els Bosch	-34.02	23.95			18-XI-1941	E. Esterhuysen 6829 (BOL)	1
Carex dregeana Kunth	South Africa: Eastern Cape Province, Humansdorp, Witte els Bosch	-34.02	23.95	750 ft.		X-1925	H.G. Fourcade 3135 (BOL)	1
Carex dregeana Kunth	South Africa: Eastern Cape Province, Signal Hill, Mountain Drive, Grahamstown	-33.333547	26.549294		grassland, eastern slopes	22-I-2008	A.M. Muasya 3794 & CH. Stirton (BOL, UPOS)	2
Carex dregeana Kunth	South Africa: Eastern Cape Province, Stutterheim	-32.5	27.4			XII-1913	F.A. Rogers 12831 (BOL)	1
Carex dregeana Kunth	South Africa: Free State Province, Golden Gate Highlands National Park	-28.505568	28.617466	1800-2100 m.	grassland in Leucosidea sericea scrub clearing	12/XII/2008	M. Luceño 66ML08 et al. (UPOS)	1
Carex dregeana Kunth	South Africa: Free State Province, Golden Gate Highlands NP, Glen Reenen Rest Camp	-28.50275	28.621111	2009 m.	burnt grassland in Leucosidea sericea scrub clearing	15-I-2010	M. Luceño 38ML10 & S. Martín-Bravo (UPOS)	1
Carex dregeana Kunth	South Africa: Free State Province, Witsieshoek			5400 ft.		1894	H. Bolus 8270 (BOL)	1
Carex dregeana Kunth	South Africa: KwaZulu-Natal Province, 103 km from Boston to Underberg on Boston-Dargle Road	-29.510527	29.962527	1504 m.	grassland	09-XI-2009	A.M. Muasya 4924 & C.H. Stirton (BOL, UPOS)	2
Carex dregeana Kunth	South Africa: KwaZulu-Natal Province, Bergville District, Cathedral Peak	-28.91	29.10	6500 ft.	grassland	27-XI-1961	O.M. Hilliard s.n. (NU s.n.)	1
Carex dregeana Kunth	South Africa: KwaZulu-Natal Province, between Kokstad and Underberg along R617, bridge over Mzuntlava River	-30.38	29.44	1490 m.	seasonally flooded grassland	14-X-2006	B. Gehrke BG-Af 451 et al. (Z)	1
Carex dregeana Kunth	South Africa: KwaZulu-Natal Province, Bulwer-Underberg road on turnoff to Pevensey	-29.842833	29.694305	1625 m.	uncultivated grassland	08-IX-2009	A.M. Muasya 4909 & CH. Stirton (BOL, UPOS)	2
Carex dregeana Kunth	South Africa: KwaZulu-Natal Province, Cathedral Peak	-28.985966	29.2321	1907 m.	grassland	15-I-2008	A.M. Muasya 3720 & C.H. Stirton (BOL, UPOS)	2
Carex dregeana Kunth	South Africa: KwaZulu-Natal Province, Drakensberg range, ca. 15 kms from Underberg, road to Bushman's Nek, Indhazila river	-29.796111	29.386111	1640 m.	grassland	12-XI-2011	S. Martín-Bravo 104SMB11 & M. Luceño (UPOS)	1
Carex dregeana Kunth	South Africa: KwaZulu-Natal Province, Drakensberg Range, Tugela Valley and Mount Aux Sources	-28.755556	28.89	1500- 2000 m.		3/8-VIII--1934	H. Humbert 14801 (P)	1
Carex dregeana Kunth	South Africa: Free State Province, Dumbe Cottages	-28.553316	29.147866	1795 m.	montane grassland	19-I-2008	A.M. Muasya 3753 & C.H. Stirton (BOL, UPOS)	2
Carex dregeana Kunth	South Africa: KwaZulu-Natal Province, Estcourt District	-29.40	29.68	5700 ft.	north facing slope	13-XI-1968	F. B. Wright 712 (NU)	1
Carex dregeana Kunth	South Africa: KwaZulu-Natal Province, Estcourt District, south of Bushman's river	-29.1	29.7	4100 ft.	greystones	07-XII-1971	(No collector's name!) 1207 (NU s.n.)	1
Carex dregeana Kunth	South Africa: KwaZulu-Natal Province, Summerveld part of Assagay	-29.8	30.7	675 m	scare graminoid in grassland	2-XI-2003	P. Wragg 379 (NU)	1
Carex dregeana Kunth	South Africa: KwaZulu-Natal Province, eThekwini municipality, Assagay	-29.805	30.700	707 m	primary grassland	11-XII-2004	P. Wragg 968 (NU)	1
Carex dregeana Kunth	South Africa: KwaZulu-Natal Province, Garden Castle Forest Reserve	-29.741466	29.18205	1920 m.	grassland	16-XII-2008	M. Luceño 100ML08 et al. (UPOS)	1
Carex dregeana Kunth	South Africa: KwaZulu-Natal Province, Glengariiff Farm, Mahaqwa mountain	-29.752119	29.652322	1686 m.	grassland	12-I-2008	A.M. Muasya 3668 & C.H. Stirton (BOL, UPOS)	2
Carex dregeana Kunth	South Africa: KwaZulu-Natal Province, Glengariiff Farm, Mahaqwa mountain	-29.76345	29.66875	1763 m.	grassland	12-I-2008	A.M. Muasya 3674 & C.H. Stirton (BOL, UPOS)	2
Carex dregeana Kunth	South Africa: KwaZulu-Natal Province, Mpendhle District, Mulangane ridge, above Carter's Nek	-29.5	29.8	7000-7300 ft.	edge of dam	1-XII-1983	O. M. Hilliard & B. L. Burtt 16994 (NU)	1
Carex dregeana Kunth	South Africa: KwaZulu-Natal Province, Imzinto District, south of Dumisa, SAPPI property on the farm Fairfield	-30.26	30.43	600 m.		21-X-1991	K. Balkwill (NU)	1
Carex dregeana Kunth	South Africa: KwaZulu-Natal Province, Jagersrus, 3 km from ATKV Drakensville to beyond Dam	-29.58875	29.088966	1272 m.	grassland	18-I-2008	A.M. Muasya 3733 & C.H. Stirton (BOL, UPOS)	2
Carex dregeana Kunth	South Africa: KwaZulu-Natal Province, Key Ridge			730 m.	steep burnt grassy hillside	23-X-1975	C.H. Stirton 5551 (P)	1
Carex dregeana Kunth	South Africa: KwaZulu-Natal Province, Kokstad			5000 ft.		1882	W. Tyson 1468 (BOL)	1
Carex dregeana Kunth	South Africa: KwaZulu-Natal Province, Krantzkloot Nature Reserve	-29.77	30.83	450 m.	Watsonia drive grassland	26-X-2001	D. Styles 61 (NU)	1
Carex dregeana Kunth	South Africa: KwaZulu-Natal Province, Nottingham Rd.	-29.35	29.99	1470 m.		28-XI-1983	Bens 475 (NU)	1
Carex dregeana Kunth	South Africa: KwaZulu-Natal Province, path to Cathedral Peak	-28.936527	29.183472	1785 m.	grassland near a stream	15-XI-2011	S. Martín-Bravo 129SMB11 & M. Luceño (UPOS)	1
Carex dregeana Kunth	South Africa: KwaZulu-Natal Province, path to Rainbow gorge	-28.950638	29.227222	1505 m.	grassland	14-XI-2011	S. Martín-Bravo 122SMB11 & M. Luceño (UPOS)	1
Carex dregeana Kunth	South Africa: KwaZulu-Natal Province, Pietermaritzburg Town hill	-29.56	30.35	c 3000 ft.	grassland	XI-1948	V. D. Huntley 394B (K)	1
Carex dregeana Kunth	South Africa: KwaZulu-Natal Province, Pietermaritzburg, Hawthorn's Hill	-29.57	30.53			20-XI-1944	R.J Allsopp (NU)	1
Carex dregeana Kunth	South Africa: KwaZulu-Natal Province, prope Kokstad			5000 ft.		1882	W. Tyson 1846 (BOL)	1
Carex dregeana Kunth	South Africa: KwaZulu-Natal Province, Road to Kokstad	-30.5236	29.523966	1402 m.	grassland	11-I-2008	A.M. Muasya 3655 & C.H. Stirton (BOL, UPOS)	2
Carex dregeana Kunth	South Africa: KwaZulu-Natal Province, Songimvelo Game Reserve. Geluk farm, in rhino camp	-25.9	30.9		steep rocky grassland with scattered Acacia trees	10-XII-1992	C. Reid 1896 (PRE)	1
Carex dregeana Kunth	South Africa: KwaZulu-Natal Province, Underberg, near Champagne Castle Hotel	-29.04	29.41	1440 m.	in valley near river	17-XI-1991	J. Browning 405 (PRE)	1
Carex dregeana Kunth	South Africa: KwaZulu-Natal Province, Vrhyeid, Blood river vlei	-28.09	30.52			08-II-1993	D. Kotze 492 (NU)	1
Carex dregeana Kunth	South Africa: KwaZulu-Natal Province, Vryheid Nature Reserve	-27.752299	30.78865	1270 m.	grassland	20-I-2008	A.M. Muasya 3784 & C.H. Stirton (BOL, UPOS)	2
Carex dregeana Kunth	South Africa: KwaZulu-Natal Province, Wahroonga farm, Near Boston	-29.61	30.13	1450 m.	grassland	8-XI-2009	A.M. Muasya 4900b & C.H. Stirton (BOL, UPOS)	2
Carex dregeana Kunth	South Africa: Mpumalanga Province, Graskop, Municipal Resort	-24.93	30.84		edge of dam	21-XI-1993	J. Browning 675 (NU)	1
Carex dregeana Kunth	South Africa: Mpumalanga Province, Lydenburg, Ohrigstad Nature Reserve	-24.95	30.62			20-I-1976	G. K. Theron 3424 (PRE)	1
Carex dregeana Kunth	South Africa: Mpumalanga Province, Lydenburg District, near Lydenburg					I-1888	F. Wilms 1583 (K)	1
Carex dregeana Kunth	South Africa: Mpumalanga Province, Lydenburg, on Geluk 732 JT	-24.9	30.7			10-XII-1992	J. Browning 500 (NU)	1
Carex dregeana Kunth	South Africa: Mpumalanga Province, Machadodorp	-25.66	30.25	5100 ft.		8-XII-1932	R.R. Gaspin (BOL45781)	1
Carex dregeana Kunth	South Africa: Mpumalanga Province, Middelburg, pr. Wonderfontein Railway Station	-25.8	29.9	6000 ft.	in graminosis	I-1906	H. Bolus 12423 (BOL)	1
Carex dregeana Kunth	South Africa: Mpumalanga Province, Mt. Sheba, pr. Barberton			3400 ft.		IX-1886	H. Bolus s.n. (BOL)	1
Carex dregeana Kunth	South Africa: Mpumalanga Province, Stardenton, Beginsel Farm					6-I-1904	J. Burtt-Davy 929 (BOL)	1
Carex dregeana Kunth	Sout Africa: North West Province, Pilanesberg, Farm Buffelskloof	-25.2	27.0		on grassy slope in damp area	30-XI-1977	L. Smook 995 (PRE)	1
Carex dregeana Kunth	Zimbabwe: Manicaland Province, Inyangani Mts, Inyanga District	-18.297348	32.844906	7000 ft.	open wet grassland	25-I-1961	H. Wild 5472 (NU)	1
Carex dregeana x spartea	South Africa: KwaZulu-Natal, 1 km from Utrecht to Wakkerstroom near top of Pass	-27.6196	30.367683	1324 m.	stony grassland	20-I-2008	A.M. Muasya 3775 & C.H. Stirton (BOL, UPOS)	2
Carex esenbeckiana Boeckeler	South Africa: In montibus prope urban Cape						Ecklon & Zeyher 85 (S-10-1129) lectotype of Uncinia lehmannii	1
Carex esenbeckiana Boeckeler	Tanzania: Tanga region, Usambara Mountains, between Mbalu und Mlalo			1800 m.		20-XII-1901	Uhlig 856 (EA s.n.) lectotype of Carex uhligii	1
Carex esenbeckiana Boeckeler	Ethiopia: Oromia region, 10 km north of Dolo Mena (Masslo) on the road to Goba	6.4	39.7	1500 m.	forest	25-X-1984	I. Friis 3458 et al. (K, PRE)	2
Carex esenbeckiana Boeckeler	Kenya: Kericho County, Sotik	-0.69	35.09		in dense forest	VII-1968	D. Napper 1677 (EA)	1
Carex esenbeckiana Boeckeler	Kenya: Laikipia County, road from Nyahururu to Nyeri, Ndarawa forest	-0.0699	36.5346	2300 m.	Podocarpus and Juniperus forest	25-VII-2007	M.L. Buide 70UPO-K et al. (UPOS)	1
Carex esenbeckiana Boeckeler	Kenya: Marsabit County, Mt. Kulal	2.738611	36.933889	6800 ft.	on floor of Nuxia-Cassipourea forest	23-II-1977	Herlocker 410 & Gogah (EA)	1
Carex esenbeckiana Boeckeler	Kenya: Marsabit County, Mt. Kulal 3 km N of Gatab	2.66	36.93	1800-2100 m.	by streams in dense forest	18-XI-1978	F.N. Hepper 6907 & P.M.L. Jaeger (P)	1
Carex esenbeckiana Boeckeler	Kenya: Marsabit County, Mt. Marsabit, near Karantin summit	2.31	37.96	1700 m.	on the ground in mist-forest	28-VI-1971	K. Lye 6338 & A.B. Katende (P)	1
Carex esenbeckiana Boeckeler	Kenya: Nakuru region, Rongai, Deloraine	0.181111	35.783333	2240 m.	forest floor with Juniperus procera among other plant species	3-XII-2003	P. Kirika 70 et al. (EA)	1
Carex esenbeckiana Boeckeler	Kenya: Narok County, Entasekera, about 9 km north east of Entasekera	-1.85	35.92	6700 ft.	along forest trail undergrowth	1-VI-1977	C. Fayad 52 (EA)	1
Carex esenbeckiana Boeckeler	Kenya: Narok County, Lolgorian area	-1.335556	34.901389	1770 m.	riparian forest	II-1979	F. Masapiri 648 & H. Mwendwa (EA)	1
Carex esenbeckiana Boeckeler	Kenya: Narok County, Loita hills, Pt. 203 to 204	-1.598889	35.794444	1530 m.	rocky gorge in riparian forest	24-XII-2017	W.R.Q. Luke 18057 & P.A. Luke (EA)	1
Carex esenbeckiana Boeckeler	Kenya: Narok County, Masailand, Endama	-1.386944	34.819444	5400 ft.	forest	23-VI-1961	P.E. Glove 1885 et. al (EA)	1
Carex esenbeckiana Boeckeler	Malawi: Rumphi District, Nyika NP	-10.7516	33.8875	2176 m.	edge of Juniperus forest	5-IV-2000	L. Smook 10905 (PRE)	1
Carex esenbeckiana Boeckeler	South Africa: Eastern Cape Province, 32 km from N2 to Prince Alfred Pass	-33.8517	23.1677	306 m.	in shade, montane forest	24-I-2008	A.M. Muasya 3844 & C.H. Stirton (BOL, UPOS)	2
Carex esenbeckiana Boeckeler	South Africa: Eastern Cape Province, Adelaide District, Farm Finnela falls	-32.40	26.37	1407 m.	afromontane-riparian forest on sandstones	23-I-2009	Clark 361 et al. (BOL)	1
Carex esenbeckiana Boeckeler	South Africa: Eastern Cape Province, Amatole Mountains near Hogsback	-32.6138	26.9222	3000 ft.	on the forest margin	9-XI-1984	P.B. Phillipson 930 (K)	1
Carex esenbeckiana Boeckeler	South Africa: Eastern Cape Province, Bathurst District	-33.49	26.85	300 m.	rocky riverbank	9-IX-1992	B. Sonnenberg 217 (NU)	1
Carex esenbeckiana Boeckeler	South Africa: Western Cape Province, George District				paths in forest	6-XI-1928	J.B. Gillett 2139 (BOL)	1
Carex esenbeckiana Boeckeler	South Africa: Western Cape Province, George District, Wilderness	-33.98	22.55		forest	10-II-1944	M.R. Henderson 15558 (PRE)	1
Carex esenbeckiana Boeckeler	South Africa: Eastern Cape Province, Grahamstown	-33.32	26.56		in sylvis		MacOwan 23812 (BOL)	1
Carex esenbeckiana Boeckeler	South Africa: Eastern Cape Province, Hogsback, Kettle Spout marsh	-32.58	26.96	1500 m.	forestry road, on the margin of forest	24-XII-1994	B. Sonnenberg 294 (NU)	1
Carex esenbeckiana Boeckeler	South Africa: Eastern Cape Province, Hogsbak, mt. King William's Town				in forests	I-1920	G. Rattray 353 (BOL)	1
Carex esenbeckiana Boeckeler	South Africa: Eastern Cape Province, Madonna and Child falls	-32.60	26.96	1500 m.	at the foot of the falls	20-XI-1994	B. Sonnenberg 340 (NU)	1
Carex esenbeckiana Boeckeler	South Africa: Eastern Cape Province, near Komga	-32.6	27.9		in woods	1891	H.G. Flanagan 908 (BOL)	1
Carex esenbeckiana Boeckeler	South Africa: Eastern Cape Province, near the Morgan's Bay	-32.71	28.35		on clay	6-II-1995	B. Sonnenberg 429 (NU)	1
Carex esenbeckiana Boeckeler	South Africa: Eastern Cape Province, Port Elizabeth, Tsitsikamma NP	-34.02	23.89	20 m.	foret near coast	4-XI-2000	P. Vargas 463PV00 (UPOS)	1
Carex esenbeckiana Boeckeler	South Africa: Eastern Cape Province, Port St. Johns	-31.7	29.4	500 ft.	margin of forest	4-XI-1953	Killick 2029 and Marais (K)	1
Carex esenbeckiana Boeckeler	South Africa: Eastern Cape Province, Wilderness area, Kaaisman's river	-33.9843	22.5502	4 m.	forest edge	25-I-2008	A.M. Muasya 3864 & C.H. Stirton (BOL, UPOS)	2
Carex esenbeckiana Boeckeler	South Africa: Free State Province, Winburg, Willem Pretorius Game Reserve	-28.29	27.24	4500 ft.		10-II-1972	D.B. Muller 889 (PRE)	1
Carex esenbeckiana Boeckeler	South Africa: Gauteng Province, Fountain Valley	-25.78	28.19	1370 m.	in shade	16-I-1986	C. Reid 1092 (PRE)	1
Carex esenbeckiana Boeckeler	South Africa: KwaZulu-Natal Province, 3 km before top of Oliviershoek pass from Bergville Forest	-28.57	29.05		in shade	5-II-1985	C. Reid 1013 (PRE)	1
Carex esenbeckiana Boeckeler	South Africa: KwaZulu-Natal Province, Bergville District, Royal Natal NP					8-II-1976	R. Physick 62 (NU)	1
Carex esenbeckiana Boeckeler	South Africa: KwaZulu-Natal Province, Bizley Nature Reserve	-29.6	30.3		in Acacia woodland	4-IV-1993	J. Browning 547 (NU)	1
Carex esenbeckiana Boeckeler	South Africa: KwaZulu-Natal Province, Cathedral Peak area	-28.9	29.2	5700 ft.	Podocarpus latifolius forest	10-I-1951	Killick 1279 (BOL)	1
Carex esenbeckiana Boeckeler	South Africa: KwaZulu-Natal Province, Cathedral Peak area	-28.9	29.2	5500 ft.	forest	3-VIII-1947	M.R. Levyns 8238 (BOL)	1
Carex esenbeckiana Boeckeler	South Africa: KwaZulu-Natal Province, Cathedral Peak Nature Reserve, path to Raimbow Gorge	-28.9598	29.2261	1460 m.	Podocarpus forest floor	13-XI-2011	S. Martín-Bravo 119SMB11 & M. Luceño (UPOS)	1
Carex esenbeckiana Boeckeler	South Africa: KwaZulu-Natal Province, Cathedral Peak Nature Reserve, Wilderness Area	-28.93	29.22	1300-1400 m.	grassland in forest	20-XII-2008	M. Luceño 12608ML et al. (UPOS)	1
Carex esenbeckiana Boeckeler	South Africa: KwaZulu-Natal Province, Ehlathini			4500 ft.	forest	17-XII-1975	E.J. Moll 2873 (PRE)	1
Carex esenbeckiana Boeckeler	South Africa: KwaZulu-Natal Province, Ehlathini, Lions river			4500 ft.		17-XII-1965	E.J. Moll 2873(a) (P)	1
Carex esenbeckiana Boeckeler	South Africa: KwaZulu-Natal Province, Elandskop, Farm Strathavon	-29.31	30.07	1430 m.		19-IV-1972	C.J. Ward 7651 (NU)	1
Carex esenbeckiana Boeckeler	South Africa: KwaZulu-Natal Province, Empangeni, Nyala Nature Reserve	-28.8	31.7		on forest floor	10-X-1991	T. Edwards 961 (PRE, NU)	2
Carex esenbeckiana Boeckeler	South Africa: KwaZulu-Natal Province, Enon forest, east of Byrne	-29.8	30.2		forest	18-VI-1989	J.O. Wirminhaus 914 (NU)	1
Carex esenbeckiana Boeckeler	South Africa: KwaZulu-Natal Province, Giant Castle Game Reserve	-29.27	29.52		dense forest	4-II-1985	C. Reid 970 (PRE)	1
Carex esenbeckiana Boeckeler	South Africa: KwaZulu-Natal Province, Hela Hela Nature Reserve	-29.90	30.09		shade near river	1-II-1991	T. Edwards 809 (K, NU)	2
Carex esenbeckiana Boeckeler	South Africa: KwaZulu-Natal Province, Ingwavuma District	-27.1	31.9	1500 ft.	forest	13-XI-1969	E.J. Moll 4479 (NU)	1
Carex esenbeckiana Boeckeler	South Africa: KwaZulu-Natal Province, Karkloof Forest	-29.3	30.4		forest understorey	25-IV-1989	J.O. Wirminghaus s.n. (NU)	1
Carex esenbeckiana Boeckeler	South Africa: KwaZulu-Natal Province, Kokstad, Insizwa	-30.4	29.6		moist open spaces in forest	22-II-1972	R.G. Strey 10724 (NU)	1
Carex esenbeckiana Boeckeler	South Africa: KwaZulu-Natal Province, Kunhardt's farm	-29.3	30.3			1-IV-1982	Kunhardt 62 (NU)	1
Carex esenbeckiana Boeckeler	South Africa: KwaZulu-Natal Province, Maclear, Pot River Berg	-30.9	28.2	5500 ft.	in wooded kloof	20-III-1904	E. Galpin 6880 (BOL)	1
Carex esenbeckiana Boeckeler	South Africa: KwaZulu-Natal Province, Monk's Cowl Nature Reserve	-29.05	29.38	1500-1750 m.	grassland	14-XII-2008	M. Luceño 8108ML et al. (UPOS)	1
Carex esenbeckiana Boeckeler	South Africa: KwaZulu-Natal Province, Mpendhle District, Loteni River Valley			5900 ft.	forest floor	13-I-1982	O.M. Hilliard & B.L Burtt 15087 (NU)	1
Carex esenbeckiana Boeckeler	South Africa: KwaZulu-Natal Province, Mpetyne florest	-30.6	29.7		forest		O.M. Hilliard 1310 (NU)	1
Carex esenbeckiana Boeckeler	South Africa: KwaZulu-Natal Province, Mtunzini District	-28.93	31.7		forest	14-XII-1968	K.D. Gordon Gray 6203 (NU)	1
Carex esenbeckiana Boeckeler	South Africa: KwaZulu-Natal Province, Mtunzini District, Ongoye forest			850 ft.	amongst grass on forest	1-II-1964	B.J. Huntley 885 (NU)	1
Carex esenbeckiana Boeckeler	South Africa: KwaZulu-Natal Province, Ngotshe District	-27.5	31.3	3500 ft.	open forest	10-II-1962	K.L. Tinley 721 (NU)	1
Carex esenbeckiana Boeckeler	South Africa: KwaZulu-Natal Province, Ntabamhlophe	-29.1179	29.6355	1674 m.	Podocarpus forest	10-XI-2012	E. Maguilla 51EMS12 et al. (UPOS)	1
Carex esenbeckiana Boeckeler	South Africa: KwaZulu-Natal Province, Qudeni, Ekombe forest	-28.6	30.8	5000 ft.	in damp places	14-II-1945	B.S. Fisher 805 (NU)	1
Carex esenbeckiana Boeckeler	South Africa: KwaZulu-Natal Province, Royal KwaZulu-Natal NP, Devil's Hoek Valley	-28.6	28.9	5500 ft.	forest floor	22-III-1981	O.M. Hilliard & B.L Burtt 14436 (K, NU)	2
Carex esenbeckiana Boeckeler	South Africa: KwaZulu-Natal Province, Umfolozi Game Reserve	-28.41	31.70		in deeply shaded closed woodland	10-III-1972	A. Downing 671 (NU)	1
Carex esenbeckiana Boeckeler	South Africa: KwaZulu-Natal Province, farms Arafat & Waterfall		30.34		forest floor	28-I-1998	J. Browning 888 (NU)	1
Carex esenbeckiana Boeckeler	South Africa: Mpumalanga Province, Lydemburg, Sabie	-25.23	30.76	1350 m.		24-II-1972	P.J. Müller 2415 (K)	1
Carex esenbeckiana Boeckeler	South Africa: Mpumalanga Province, Lyndenburg, Buffelskloof Nature Reserve	-24.98	30.23	1200 m.	forest	13-XII-2004	J.E. Burrows 8691 (PRE)	1
Carex esenbeckiana Boeckeler	South Africa: Mpumalanga Province, Songimvelo Game Reserve	-25.9	31.0		forest by river	8-XII-1991	J. Browning 484 (NU)	1
Carex esenbeckiana Boeckeler	South Africa: North West Province, Pilanesberg, Buffelskloof	-25.2	27.1		in dense shade	29-XI-1977	L. Smook 984 (PRE)	1
Carex esenbeckiana Boeckeler	South Africa: Western Cape Province, Cape Town, Skeleton Gorge	-33.9843	18.42	162-768 m.	afromontane forest	8-X-2017	J.I. Márquez-Corro 67JMC17, 68JMC17, 79JMC17 et al. (UPOS)	3
Carex esenbeckiana Boeckeler	South Africa: Western Cape Province, Cape Town, Table Mountain, Contour path, above Kirstenbosch	-33.9843	18.43	250 m.	afromontane forest	17-II-2012	A.M. Muasya 6459 (BOL)	1
Carex esenbeckiana Boeckeler	South Africa: Western Cape Province, Kalandarklof	-33.9	22.8		in shade	13-III-1998	J. Browning 924 (NU)	1
Carex esenbeckiana Boeckeler	South Africa: Western Cape Province, Knysna-Knysna				margin of forest	31-I-1927	A.V. Duthil 1050 (BOL)	1
Carex esenbeckiana Boeckeler	South Africa: Western Cape Province, Vogelgat Private Nature Reserve	-34.40	19.32	10 m.	somewhat shady and dampish	31-V-1980	I. Williams 3010 (PRE)	1
Carex esenbeckiana Boeckeler	South Africa: Western Cape Province, Kirstenbosch	-33.98	18.42			1918	M.M. Page s.n. (BOL171115)	1
Carex esenbeckiana Boeckeler	Tanzania: Arusha region, Arusha NP, forest reserve along the road to Arusha, ca. 3 km S of Momela gate	-3.2567	36.8424	1750 m.	open understory of tall forest	7-X-1977	J. Raynal 19496 (P)	1
Carex esenbeckiana Boeckeler	Tanzania: Arusha region, Ngurdoto Mt.	-3.321667	36.849722	4900 ft.		7-X-1965	P.J. Greenway 11981, 12266 (EA)	1
Carex esenbeckiana Boeckeler	Tanzania: Iringa region, Kibengu, Dabaga Highlands, 18 ml. S. of Dabaga	-8.296389	35.724167	6650 ft.	glades in upland mist forest	13-II-1962	P. Polhill 14516 & S. Paulo (EA)	1
Carex esenbeckiana Boeckeler	Tanzania: Kilimanjaro region, Lerongo hill, west Kilimanjaro	-3.13	37.06	1490 m.	Olea africana forest	13-XII-1996	A. Hemp 2022 (UBT)	1
Carex esenbeckiana Boeckeler	Tanzania: Tanga region, Usambara Mountains, between Mkuzi Migaubo and Kifungilo	-4.766667	38.35		field layer of forest by riverside	23-IV-1953	R.B. Drummond 2205 & J.H. Hemsley (EA)	1
Carex esenbeckiana Boeckeler	Zimbabwe: Manicaland Province, Mt. Selinda, Chipinga District	-20.4	32.7		edge of evergreen forest	31-XII-1964	E.A. Robinson 6352 (P)	1
Carex gordon-grayae Luceño, Márquez-Corro & Sánchez-Villegas	South Africa: KwaZulu-Natal Province, Port Shepstone, Baboon Spruit District, Oribi Gorge	-30.69	30.26	400 m.	edge of forests	II-1973	L.E. Davidson 2649 (NU-0002643) holotype	1
Carex gordon-grayae Luceño, Márquez-Corro & Sánchez-Villegas	South Africa: Eastern Cape Province, Hagga-Hagga District	-32.68	28.20	225 m.	marsh	7-II-1995	B. Sonnenberg 446 (NU) paratype	1
Carex gordon-grayae Luceño, Márquez-Corro & Sánchez-Villegas	South Africa: Eastern Cape, Kentani	-32.502119	28.335972	370 m.	stream edge in forest	4-IV-1904	A.M. Pegler 1097 (BOL-4655), paratype	1
Carex killickii Nelmes	Lesotho: Mokhotlong District, between Indumeni and Castle Buttress			9700 ft.	moist parts of alpine grassland	5-XII-1952	Killick 1848 (K-000363522) holotype; (K-000363523), (NU-0014692) isotypes	3
Carex killickii Nelmes	South Africa: Eastern Cape Province, summit of Great Winterberg			2570 m	under rocks	8-III-1900	Galpin 5605 (K-000693800) lectotype of Schoenoxiphium filiforme; (GRA-0000244), (PRE-0107826) isotypes	3
Carex killickii Nelmes	South Africa: KwaZulu-Natal Province, Underberg District, 5-7 miles NNW of Castle View farm,	-29.4697	29.4121	7000 ft.	at damp mouth of sandstone cave	23-XI-1980	O.M. Hilliard & B.L. Burtt 13574 (H-1455011) holotype of S. molle; (E-00286097), (GENT-0000090032813), (NU-0015652) isoypes	4
Carex killickii Nelmes	South Africa: KwaZulu-Natal Province, Garden Castle Forest Reserve, Mlambonja valley	-29.73	29.18	6600 ft.	in grass on cave sandstone ridge	5-I-1982	O.M. Hilliard & B.L. Burtt 14909 (H-1461500) holotype of S. strictum; (E-0286107), (GENT-0000090032929), (NU-0015651) isotypes	4
Carex killickii Nelmes	Lesotho: Butha Buthe District, Khatibe Camp B.	-28.741389	28.615556	9500 ft.	valley grassland, wet slope	21-I-1962	R.A. Lucke 269 (K)	1
Carex killickii Nelmes	Lesotho: Leribe District, LHDA, Marakableis, Bokong Vlei, near Pass top.				in vlei with Isolepis sp.	07-XII-1991	J. Browning 423 (NU)	1
Carex killickii Nelmes	Lesotho: Leribe District, Pitseng, Mafika Lisiu Pass	-29.065368	28.405723	3142 m.	summit meadows	14-I-2014	T. Villaverde 17TVH14 et al. (UPOS)	1
Carex killickii Nelmes	Lesotho: Leribe District, Pitseng, Mafika Lisiu Pass, North side of the road that going up to the top, left side	-29.066111	28.4075	3101 m.	bog on stream edge	14-I-2014	T. Villaverde 19TVH14, 23TVH14, 25TVH14, 26TVH14 et al. (UPOS)	4
Carex killickii Nelmes	Lesotho: Leribe District, Pitseng, Mafika Lisiu Pass, North side of the road that going up to the top, left side	-29.065173	28.410918	3051 m.	peatbog	14-I-2014	T. Villaverde 32TVH14 et al. (UPOS)	1
Carex killickii Nelmes	Lesotho: Leribe District, shallow slopes and banks of upper waters of the Mokhoulane River	-29.150278	28.4325	2620 m.	SE- and S-facing slopes	13-I-1996	P.B. Phillipson 4608 et al. (K)	1
Carex killickii Nelmes	Lesotho: Leribe District, Tsehlanyane National Park - Malibra Mountain Lodge, Lower trial to black pool, near trial	-28.90488	28.447099	2066 m.	roadside	15-I-2014	T. Villaverde 74TVH14 et al. (UPOS)	1
Carex killickii Nelmes	Lesotho: Maseru District, Semonkong, trial from Roma to Semonkong	-29.700453	27.947417	2620 m.	stream edge	16-I-2014	T. Villaverde 85TVH14, 86TVH14, 88TVH14 et al. (UPOS)	3
Carex killickii Nelmes	Lesotho: Maseru District, Semonkong, trial from Roma to Semonkong	-29.670912	27.992406	2422 m.	thicket with Helichrysum sp.	16-I-2014	T. Villaverde 82TVH14 et al. (UPOS)	1
Carex killickii Nelmes	Lesotho: Maseru District, Semonkong, trial from Roma to Semonkong	-29.728153	27.947558	2848 m.	basaltic stony slope	16-I-2014	T. Villaverde 100TVH14 et al. (UPOS)	1
Carex killickii Nelmes	Lesotho: Maseru District, Semonkong, trial from Roma to Semonkong	-29.758755	27.993641	2569 m.	dry field with Helichrysum sp.	18-I-2014	T. Villaverde 123TVH14 et al. (UPOS)	1
Carex killickii Nelmes	Lesotho: Maseru District, Semonkong, trial from Roma to Semonkong	-29.759038	27.987804	2567 m.	scrub clearings with Helichrysum sp.	18-I-2014	T. Villaverde 125TVH14 et al. (UPOS)	1
Carex killickii Nelmes	Lesotho: Maseru District, Tsehlanyane National Park, upper trail to blak pool	-28.911222	28.435261	1990 m.	Rosaceae forest	15-I-2014	T. Villaverde 57TVH14 et al. (UPOS)	1
Carex killickii Nelmes	Lesotho: Qacha's Nek District, Sehlabathebe	-29.904722	29.131111	2300-2500 m.	in vicinity rock pools	4-I-1973	J. Guillarmod, 44 et al. (PRE)	1
Carex killickii Nelmes	Lesotho: Qacha's Nek District, Sehlabathebe, Sehlabathebe National Park	-29.883889	29.1075	2500 m.	in grassland amongst escarpment rocks and tarns	29-I-1995	J. Browning 713 (NU)	1
Carex killickii Nelmes	Lesotho: Thaba Tseka District, Sani Pass	-29.569283	29.269002	2880 m.	wet alpine grassland	17-XII-2008	S. Martín Bravo 164SMB08 et al. (UPOS)	1
Carex killickii Nelmes	Lesotho: Thaba-Tseka District, Sani Pass Summit, 1-2 km N of chalet	-29.584444	29.285	2860 m.	common in sedge meadows at edge of bog	17-I-1977	D.J.B. Killick 4184 (PRE)	1
Carex killickii Nelmes	South Africa: Eastern Cape Province, Barkly East District, Ben Mc. Dhui	-30.6375	27.933333	8400 ft.	wet tuft on streamside	03-XII-1981	O.M. Hillard & B.L. Burtt 14693 (NU)	1
Carex killickii Nelmes	South Africa: Eastern Cape Province, Barkly East District, Saalboom Nek	-31.015	27.540278	7200 ft.	mountain veld	15-I-1959	J.P.H. Acocks 20214 (PRE)	1
Carex killickii Nelmes	South Africa: Eastern Cape Province, Barkly East District, Saalboom Nek	-29.904722	29.131111	c. 7200 ft.	mountain veld	15-I-1959	J.P.H. Acocks 20214 (PRE)	1
Carex killickii Nelmes	South Africa: Eastern Cape Province, Barkly East, near Tiffindel ski station	-30.646388	27.928888	2950 m.	grassland	17-I-2008	C. Aedo 15204 et al. (UPOS)	1
Carex killickii Nelmes	South Africa: Eastern Cape Province, Drakensberg's, near Barkly East, Nudes Nek	-30.744444	28.141667	2450 m.	at top of steep descent on E. side	19-XII-1982	P.B. Phillipson 667 (K)	1
Carex killickii Nelmes	South Africa: Eastern Cape Province, Barkly East, New England						P. Joubert s.n. (PRE-39081)	1
Carex killickii Nelmes	South Africa: Eastern Cape Province, King Williams Town, Amatole Mts.	-32.750556	27.241667	5000-5500 ft.	amongst grass + rocks-scarce	X-1925	R. Cheyer 341 (K)	1
Carex killickii Nelmes	South Africa: Eastern Cape Province, Maclear, Bastervoetpad, 2.5 km from the top of Bastervoetpad	-31.246667	27.864444	1900 m.	sub-alpine grassland. Well drained humic/tuffed soil	13-I-1995	S.P. Bester 3551 (PRE)	1
Carex killickii Nelmes	South Africa: Eastern Cape Province, Tennahead, Naudesnek	-30.7201	28.1364	2520 m	valley head seepage	I-2006	Sieben, Kotze & McCulloch, MDO122 (UPOS)	1
Carex killickii Nelmes	South Africa: Free State Province, Golden Gate Highlands National Park	-28.509166	28.616666	1800-2100 m.	grassland in thicket of Leucosidea sericea	12-XII-2008	M. Luceño 68ML08 et al. (UPOS)	1
Carex killickii Nelmes	South Africa: Free State Province, Witsieshoek mountain, 10 km from Phuthaditjhaba	-28.6872	28.8978	2195 m.	grassland in slope	16-XI-2010	S. Martín-Bravo 124SMB10 et al. (UPOS)	1
Carex killickii Nelmes	South Africa: Free State Province, Golden Gate Highlands National Park, between Clarens and Phuthaditjhaba, trail that starts fromb Glen Reenen Rest Camp to Boskloof	-28.498771	28.618809	2040 m.	roadside, understory	20-I-2014	T. Villaverde 139TVH14 et al. (UPOS)	1
Carex killickii Nelmes	South Africa: KwaZulu-Natal Province, Bergville Distrct., Mount Aux Sources	-28.755556	28.89	10000 ft.	recently burnt Erica sp. comunity	17-III-1955	J. Edwards 598 (NU)	1
Carex killickii Nelmes	South Africa: KwaZulu-Natal Province, Bergville District, Cathedral Peak Forestry Station	-28.932141	29.177410	6800 ft.		27-XI-1952	D.K.B. Killick 1797 (PRE)	1
Carex killickii Nelmes	South Africa: KwaZulu-Natal Province, Bergville District, Cathedral Peak Forestry Station	-28.932141	29.177410	6200 ft.		1951-11-07	D.J.B. Killick 1540 (K)	1
Carex killickii Nelmes	South Africa: KwaZulu-Natal Province, Bergville District, Cathedral Peak Forestry Station	-28.932141	29.177410	6800 ft.	fairly frequent in Pentochistis sp. grassland	24-XI-1952	D.J.B. Killick 1794 (K)	1
Carex killickii Nelmes	South Africa: KwaZulu-Natal Province, Bushman's Neck area	-29.833611	29.183611	1790 m.	grassland	19-XII-2008	M. Luceño 121ML08 et al. (UPOS)	1
Carex killickii Nelmes	South Africa: KwaZulu-Natal Province, Bushman's Nek area, along the path towards the north east	-29.836111	29.213333	1770 m.	slope of relatively dry grassland	15-X-2006	B. Gehrke BG-Af 455 (Z)	1
Carex killickii Nelmes	South Africa: KwaZulu-Natal Province, Bushman's Nek area, Caravan Park	-29.840833	29.217499	1846 m.	grassland	15-XI-2012	E. Maguilla 72EMS12 et al. (UPOS)	1
Carex killickii Nelmes	South Africa: KwaZulu-Natal Province, Drakensberg mountain range, Cathedral Peak, Mlambonja, Wilderness area, ascent trial to Cathedral peak	-29.933611	29.179166	1875 m.	grassland in slopes	15-XI-2011	S. Martín-Bravo 133SMB11 & M. Luceño (UPOS)	1
Carex killickii Nelmes	South Africa: KwaZulu-Natal Province, Drakensberg mountains, Garden Castle Forest Reserve, path to Rhino Peak	-29.729722	-29.1665	2286 m.	trail's edges	19-XI-2010	S. Martín-Bravo 136SMB10 & M. Luceño (UPOS)	1
Carex killickii Nelmes	South Africa: KwaZulu-Natal Province, Drakensberg, on route to Organ Pipes Pass			8000 ft.	rock ledges	28-I-1959	McCallum-Webster s.n. (NU0022680)	1
Carex killickii Nelmes	South Africa: KwaZulu-Natal Province, Drakensberg, near The Camel			7000 ft.	rocks	26-I-1959	McCallum-Webster s.n. (NU0018426)	1
Carex killickii Nelmes	South Africa: KwaZulu-Natal Province, Drakensberg Range, Tugela Valley and Mount Aux Sources	-28.755556	28.89	3000-3300 m.		1934	H. Humbert 15265 (P)	1
Carex killickii Nelmes	South Africa: KwaZulu-Natal Province, Estcourt distr, Cascade			c. 7000 ft.	south face of dolerite sill	27-XII-1968	F.B. Wright 788 (NU)	1
Carex killickii Nelmes	South Africa: KwaZulu-Natal Province, Garden Castle Forest Reserve	-29.746666	29.169166	1920 m.	grassland	16-XII-2008	M. Luceño 99ML08 et al. (UPOS)	1
Carex killickii Nelmes	South Africa: KwaZulu-Natal Province, Garden Castle Forest Reserve	-29.750277	29.211944	1803 m .	next to stream, floodplain	16-XI-2012	E. Maguilla 81EMS12 et al. (UPOS)	1
Carex killickii Nelmes	South Africa: KwaZulu-Natal Province, Garden Castle Forest Reserve	-29.750278	29.211945	1804 m.	next to stream, floodplain	16-XI-2013	E. Maguilla 82EMS12 et al. (UPOS)	1
Carex killickii Nelmes	South Africa: KwaZulu-Natal Province, Garden Castle Forest Reserve	-29.750279	29.211946	1805 m.	next to stream, floodplain	16-XI-2014	E. Maguilla 80EMS12 et al. (UPOS)	1
Carex killickii Nelmes	South Africa: KwaZulu-Natal Province, Garden Castle Forest Reserve	-29.745767	29.206983	1850 m.	grassland	16-XII-2008	M. Luceño 93ML08 et al. (UPOS)	1
Carex killickii Nelmes	South Africa: KwaZulu-Natal Province, Garden Castle Forest Reserve, path to Rhino peak	-29.721111	29.166944	2281 m.	open grassland	19-XII-2008	B. Gehrke BG565 & M. Pirie (UPOS)	1
Carex killickii Nelmes	South Africa: KwaZulu-Natal Province, Giants Castle Game Reserve, Forest Walk Watercourse below small waterfall	-29.107778	29.419444		small tufts	04-II-1985	C. Reid 981 (PRE)	1
Carex killickii Nelmes	South Africa: KwaZulu-Natal Province, Mpendhle District, 2929BC, Highmoor F. R. Ridge SE Giant's Castle headwaters of Elandshoek river	-29.353333	29.51	8300 ft.	wek tuft on basal clift	06-I-1983	O.M. Hillard & B.L. Burtt 16256 (NU)	1
Carex killickii Nelmes	South Africa: KwaZulu-Natal Province, Mpendhle District, headwaters of KaNtusa stream			8000 ft.	steep stony slope on basale ridle	30-XI-1982	O.M. Hillard & B.L. Burtt 15713 (K)	1
Carex killickii Nelmes	South Africa: KwaZulu-Natal Province, Mpendhle District, Kamberg area			7000 ft.	among rocks	14-XII-1978	O.M. Hillard & B.L. Burtt 11714 (NU)	1
Carex killickii Nelmes		-29.40	29.68	7000-7300 ft.	rather dry stone hillside	2-XII-1983	O.M. Hillard & B.L. Burtt 17039 (NU)	1
Carex killickii Nelmes	South Africa: KwaZulu-Natal Province, Mpendhle District, Mulangane ridge, above Carter's Nek	-29.40	29.68	7000-7300 ft.	stony ground among sandstone rocks	30-XI-1983	O.M. Hillard & B.L. Burtt 16936 (K, NU)	2
Carex killickii Nelmes	South Africa: KwaZulu-Natal Province, Mpendhle District, Mulangane ridge, above Carter's Nek	-29.4	29.7	7000-7300 ft.	under wet, shady overhap.	5-II-1984	O.M. Hilliard & B.L. Burtt 17601 (NU)	1
Carex killickii Nelmes	South Africa: KwaZulu-Natal Province, Maloti-Drakensberg Park World Heritage Site, Monks Cowl	-29.035555	29.402222	1650 m.	grassland	14-XII-2008	M. Luceño 77ML08 et al. (UPOS)	1
Carex killickii Nelmes	South Africa: KwaZulu-Natal Province, Mlambonja Wilderness area, Cathedral Peak ascent, between Sherman's Cave and Orange Peel Gap	-28.930319	29.148225	1900-2200 m.	grassland	20-XII-2008	S. Martín-Bravo 184SMB08 et al. (UPOS)	1
Carex killickii Nelmes	South Africa: KwaZulu-Natal Province, Port Shepstone District, Oribi Gorge	-30.696944	30.274444	500-600 m.		II-1973	L.E. Davidson 2648 (NU)	1
Carex killickii Nelmes	South Africa: KwaZulu-Natal Province, Ukhahlamba, Drakensberg park, Cathedral Peak, Path to Cathedral peak	-28.933333	29.176388	1918 m.	open grassland	20-XII-2008	B. Gehrke BG575 & M. Pirie (UPOS)	1
Carex killickii Nelmes	South Africa: KwaZulu-Natal Province, Underberg District, 5-7 miles NNW of Castle View Farm, headwaters Mlahlangubo River	-29.484166	29.45	6900 ft.	gravelly soil in bamlden bed	21-I-1982	O.M. Hillard & B.L. Burtt 15289 (K)	1
Carex killickii Nelmes	South Africa: KwaZulu-Natal Province, Underberg District, 5-7 miles NNW of Castle View Farm, headwaters Mlahlangubo River	-29.4875	29.443888	6800 ft.	in burnt marsh and damp grassland over Cave Sandstone	25-XI-1980	O.M. Hillard & B.L. Burtt 13638 (K)	1
Carex killickii Nelmes	South Africa: KwaZulu-Natal Province, Underberg District, 5-7 miles NW from Garden Castle Forest Reserve, headwaters of Mlahlangubo River	-29.494444	29.445278	6700 ft.	on damp cave sandstone cliff, but also scattered on grass slope	19-I-1982	O.M. Hillard & B.L. Burtt 15181 (NU)	1
Carex killickii Nelmes	South Africa: KwaZulu-Natal Province, Underberg District, Bamboo Mt., S. side above Restmount	-29.741944	29.352500	c. 6000 ft.	damp ground at foot glarge rock outcrop	20-XI-1982	O.M. Hillard & B.L. Burtt 15564 (NU)	1
Carex killickii Nelmes	South Africa: KwaZulu-Natal Province, Underberg District, Bamboo Mt., S. side above Restmount	-29.741944	29.352500	c. 6000 ft.	damp ground at foot glarge rock outcrop	20-XI-1982	O.M. Hillard & B.L. Burtt 15564 (P)	1
Carex killickii Nelmes	South Africa: KwaZulu-Natal Province, Underberg District, Chameleon Cave area, c. 5 miles N. of Castle View farm	-29.075556	29.373056	7000 ft.	wet areas and by stream	1-XII-1984	O.M. Hillard & B.L. Burtt 17773 (NU, P)	2
Carex killickii Nelmes	South Africa: KwaZulu-Natal Province, Underberg District, Chameleon Cave area, c. 5 miles N. of Castle View farm	-29.71	29.30	6700 ft.	wet craek in cliff	2-XII-1984	O.M. Hilliard & B.L Burtt 17790 (NU)	1
Carex killickii Nelmes	South Africa: KwaZulu-Natal Province, Underberg District, Cobham Forest Reserve, 'Lakes' cave area	-29.663333	29.314444	c. 7800 ft.	damp places on basalt cliffs and at foot among rocks	12-XII-1982	J. Manning, O.M. Hillard & B.L. Burtt 15915 (NU)	1
Carex killickii Nelmes	South Africa: KwaZulu-Natal Province, Underberg District, Cobham Forest Reserve, Sipongweni	-29.66	29.39	6500 ft.	edge of wet drainage gully	22-II-1981	O.M. Hillard & B.L. Burtt 14120 (NU)	1
Carex killickii Nelmes	South Africa: KwaZulu-Natal Province, Underberg District, Cobham Forest Reserve, upper Polela cave area	-29.643889	29.309444	7600 ft.	in wet tus rocks and cracks on basalt cliffs	13-II-1979	O.M. Hillard & B.L. Burtt 12491 (NU)	1
Carex killickii Nelmes	South Africa: KwaZulu-Natal Province, Underberg District, Cobham Forest Reserve, upper Polela cave area	-29.643889	29.309444	c. 6800 ft.	edge on sandstone cliff	14-II-1979	O.M. Hillard & B.L. Burtt 12563 (NU)	1
Carex killickii Nelmes	South Africa: KwaZulu-Natal Province, Underberg District, Garden Castle Forest Reserve, Mlambonja Valley	-29.730833	29.182222	6400-6800 ft.	grass banks in valley	04-I-1982	O.M. Hillard & B.L. Burtt 14878 (NU)	1
Carex killickii Nelmes	South Africa: KwaZulu-Natal Province, Underberg District, Gxalingenwa valley, between Sani Pass and Polela valley	-29.60993	29.36850	c. 7400 ft.	on damp banks below basalt cliffs	11-XII-1983	O.M. Hillard & B.L. Burtt 17196 (K, NU)	2
Carex killickii Nelmes	South Africa: KwaZulu-Natal Province, Underberg District, Gxalingenwa valley, between Sani Pass and Polela valley	-29.60993	29.36850	c. 7000 ft.	S-facing grass slope above stream	09-XII-1983	O.M. Hillard & B.L. Burtt 17081 (K)	1
Carex killickii Nelmes	South Africa: KwaZulu-Natal Province, Underberg District, Mkomazi river (feeders of Ka-Ntubu)	-29.48	29.33	7300 ft.	damp N facing cliff	1-XII-1982	O.M. Hillard & B.L. Burtt 15763 (NU)	1
Carex killickii Nelmes	South Africa: KwaZulu-Natal Province, Underberg District, Sani Pass	-29.594167	29.302222	6800 ft.	damp rocky bank	13-XII-1984	O.M. Hillard & B.L. Burtt 17926 (NU)	1
Carex killickii Nelmes	South Africa: KwaZulu-Natal Province, Underberg District, Sani Pass	-29.594167	29.302222	7800 ft.	streamside rocks and near gravel	07-I-1989	O.M. Hillard et al. 17295 (K, NU)	2
Carex killickii Nelmes	South Africa: KwaZulu-Natal Province, Underberg District, Cobham Nature Reserve, upper Polela Cave area			7000 ft.	under sandstone overhang	23-XI-1976	O.M. Hillard & B.L. Burtt 9341 (NU)	1
Carex killickii Nelmes	South Africa: Western Cape Province, Farm Koueveld	-32.15	24.04	1850 m.	in wet rocks at base of waterfall	26-XI-2006	V.R. Clark 340 & Te Water Naude (UPOS)	1
Carex kukkoneniana Luceño & Martín-Bravo	South Africa: KwaZulu-Natal Province					IV-1884	Buchanan 134 (K-000693792) holotype	1
Carex kukkoneniana Luceño & Martín-Bravo	Eswatini: Hhohho District, Mbabane, Fubes Reef	-26.292829	31.098483	4500 ft.	edge of swamp	26-X-1963	Comptons 31724 (PRE)	1
Carex kukkoneniana Luceño & Martín-Bravo	Malawi: Chitipa District, Nyika Plateau, Eastern side	-10.4456	33.8213	8000 ft.	dryish ground at edge of bog	5-I-1959	E.A. Robinson 3070 (K)	1
Carex kukkoneniana Luceño & Martín-Bravo	Malawi: Rumphi District, Nyika National Park, Chelinda river Road, shortcut from the Camp to the airstrip	-10.59	33.81	2345 m.	open and sunny river edge, in dense tussock reaching the river banks	07-II-2005	B. Gehrke & Hassam I. Patel BG-Af 321 (Z)	1
Carex kukkoneniana Luceño & Martín-Bravo	South Africa: Eastern Cape Province, near Komgha	-32.300486	26.439448	2000 m.	marshy spots	XII-1891	H.G. Flanagan 915 (PRE)	1
Carex kukkoneniana Luceño & Martín-Bravo	South Africa: Eastern Cape Province, Stutterheim	-32.535394	27.403461	3100 ft.	forest margin in a damp place	15-II-1942	J.P.H. Acocks_9346 (PRE)	1
Carex kukkoneniana Luceño & Martín-Bravo	South Africa: Eastern Cape Province, Asante Sana Private Game Reserve, Sneeuberg, below Kouekop	-32.2430	24.9425	1887 m.	moist grassland below main cliff-line	4-III-2006	R. McKenzie 129 et al. (UPOS)	1
Carex kukkoneniana Luceño & Martín-Bravo	South Africa: KwaZulu-Natal, Tygerskloof Natural Reserve	-29.77	30.83		damp forest paths	28-X-2000	Edwards 2700 & Potgieter (NU)	1
Carex kukkoneniana Luceño & Martín-Bravo	South Africa: KwaZulu-Natal Province, Estcourt District, side of direct path from Giants Castle Rest Camp to Giants Castle Mtn. Hut. 3 mts from Camp.	-29.301400	29.510729	6200 ft.		3-XII-1968	F. B. Wright 741 (NU)	1
Carex kukkoneniana Luceño & Martín-Bravo	South Africa: KwaZulu-Natal Province, Underberg District, upper tributaries S of Mkomazi R. (feeders of Ka-Ntubu)			6800-7500 ft.	streamside in grass.	3-XII-1982	O.M. Hillard et al. 15829 (NU)	1
Carex kukkoneniana Luceño & Martín-Bravo	South Africa: Mpumalanga Province, Ohrigstad Dam Nature Reserve	-24.959077	30.636522	5000 ft.	in clayey- humus soil.	9-II-1976	N. Jacobsen 1768 (PRE)	1
Carex kukkoneniana Luceño & Martín-Bravo	South Africa: Mpumalanga Province, Pilgrim's Rest, 11 m from Graskops on road to Naslbank	-24.935529	30.793774		clay soils near river	13-X-1947	B. de Winter & L.E. Codd (PRE)	1
Carex kukkoneniana Luceño & Martín-Bravo	South Africa: Mpumalanga Province, Pilgrim's Rest, Mount Sheba Nature Reserve	-24.9379846	30.709106			I-1976	Forrester & Gooyer s.n. (NU)	1
Carex kukkoneniana Luceño & Martín-Bravo	Tanzania: Mbeya region, Elton Plateau	-8.849505	33.455880	7000 ft.	by streams in marsh	24-I-1961	Richards 14161b (K)	1
Carex kukkoneniana Luceño & Martín-Bravo	Zimbabwe ["S. Rhodesia"]						Robinson 1909 (K)	1
Carex kukkoneniana Luceño & Martín-Bravo	Zimbabwe: Manicaland Province, Nyanga: Çairesi Ranch, on P.E.A. border, 6 m N. of Troutbeck	-18.093399	32.813033	6000 ft.		11-VI-1956	E. A. Robinson s.n. (NU)	1
Carex kukkoneniana Luceño & Martín-Bravo	Zimbabwe: Manicaland Province, Nyangani Mountains	-18.28	32.83	2000-2500 m.		21 1 22-IV-1934	H. Humbert 15799 (P-01671410)	1
Carex lancea (Thunb.) Baill.	South Africa: Cape region						Thunberg s.n. (UPS-1350) holotype	1
Carex lancea (Thunb.) Baill.	South Africa: "Cap. b. sp."						Drège s.n. (P-00461996) lectotype of Schoenoxiphium meyerianum!	1
Carex lancea (Thunb.) Baill.	South Africa: "Cape-de-Bonne-Espérance						Drège s.n. (LE-00010148) isotype of Schoenoxiphium meyerianum	1
Carex lancea (Thunb.) Baill.	South Africa: Cape de Bonne Espérance						Drège s.n. (P-00461995)	1
Carex lancea (Thunb.) Baill.	South Africa						Drège s.n. (LE-00010147)	1
Carex lancea (Thunb.) Baill.	South Africa: "Cap, near Honigvalei and Klaudeberg			3000-4000 ft.			Dège s.n. (HAL-0109861)	1
Carex lancea (Thunb.) Baill.	South Africa: Western Cape Province, Cape Town, Table Mountain, "In der Kluft nach der Platte des Tafelberges dicht am Gipfel					VIII	Ecklon s.n. (LE-00010144)	1
Carex lancea (Thunb.) Baill.	South Africa						Drège s.n.. (TUB-007500)	1
Carex lancea (Thunb.) Baill.	South Africa: Western Cape Province, Mount Table				in umbrosis inter saxa		Ecklon 851 (HAL-0109862, TUB-007505)	2
Carex lancea (Thunb.) Baill.	South Africa: "NoogeKraalrivier"					15-IX-1831	Drège s.n. (P-01671267)	1
Carex lancea (Thunb.) Baill.	South Africa: "Malbroks Kloof"			2000-2500 ft.		09-II-1828	Drège s.n. (P-01671264)	1
Carex lancea (Thunb.) Baill.	South Africa: "Dutoits Koof, Worcester Div."						Drège s.n. (K-000363527)	1
Carex lancea (Thunb.) Baill.	South Africa: Eastern Cape Province, Glenhaven homestead Sneeuberg	-32.29	25.03	1350 m	streambed	5-XII-2005	V.R. Clark 53 & G. Coombs (BOL)	1
Carex lancea (Thunb.) Baill.	South Africa: Eastern Cape Province, Hogsback, Kettle Spout marsh	-33.550278	26.818056	1500 m.	growing on the Kettle spout stream banks, 50 m from the main forestry road, fynbos	24-XI-1994	B. Sonnenberg 296 (NU)	1
Carex lancea (Thunb.) Baill.	South Africa: Eastern Cape Province, Humansdorp, Elandsbos River			155 m.		09-VII-1960	J.P.H. Acocks 21192	1
Carex lancea (Thunb.) Baill.	South Africa: Eastern Cape Province, Humansdorp, Witte els Bosch	-34.02	23.95		forest	10-VIII-1928	J.B. Gillett 2241 (BOL)	1
Carex lancea (Thunb.) Baill.	South Africa: Eastern Cape Province, Knysna, Deep Wall	-34.01	23.10			III-1925	J. Phillips 554 (BOL)	1
Carex lancea (Thunb.) Baill.	South Africa: Western Cape Province, Cap de Bonne Espérance	-34.349444	18.481667				Drège (P-00481996)	1
Carex lancea (Thunb.) Baill.	South Africa: Western Cape Province, Cape Peninsula, Orangekloof	-33.997778	18.392778		in forest		R.H. Marloth 4515 (PRE)	1
Carex lancea (Thunb.) Baill.	South Africa: Western Cape Province, Cape Town, Skeleton Gorge	-33.986444	18.4298056	162-768 m.	afromontane forest	08-X-2017	J.I. Márquez-Corro et al. 74JMC17, 75JMC17 (UPOS)	2
Carex lancea (Thunb.) Baill.	South Africa: Western Cape Province, Cape Town, Table Mountain, Disa-Gorge	-33.981111	18.3925			07-I-1923	L.E. Huors 7621 (K)	1
Carex lancea (Thunb.) Baill.	South Africa: Western Cape Province, Cape Town, Table Mountain, Skeleton Gorge	-33.98	18.43	343 m.	in forest undergrowth	12-IX-2009	A.M. Muasya 4544 et al, (BOL)	1
Carex lancea (Thunb.) Baill.	South Africa: Western Cape Province, George, Montague Pass	-33.895278	22.41944			14-II-1957	P. Fairall s.n. (NU)	1
Carex lancea (Thunb.) Baill.	South Africa: Western Cape Province, Heidelberg	-34.043333	20.955	c. 1200 ft.	forest relief	23-VII.1962	H.C. Taylor 3548 (PRE)	1
Carex lancea (Thunb.) Baill.	South Africa: Western Cape Province, in lateri orientalis Montis Tabularis	-33.9	18.4	1600 ft.	in umbrosis saxosis	IX-1882	H. Bolus 7938 (BOL)	1
Carex lancea (Thunb.) Baill.	South Africa: Western Cape Province, Jonkershoek	-33.9	19.0		under trees in wood	13-XI-1941	M.R. Levyns 8472 (BOL)	1
Carex lancea (Thunb.) Baill.	South Africa: Western Cape Province, Kaap, George, Paddawaterbos				in w-tipe bos langs bospad	31-VII-1970	C.J. Geldenhuys 92 (PRE)	1
Carex lancea (Thunb.) Baill.	South Africa: Western Cape Province, Kannaland, Towerkop Nature Reserve, near Seweweekspoortrivier	-33.386556	21.408667	906-968 m.	rock fissures and soil near waterfall	12-X-2017	J.I. Márquez-Corro 139JMC17, 148JMC17 et al. (UPOS)	2
Carex lancea (Thunb.) Baill.	South Africa: Western Cape Province, Knysna, Diepwalle	-33.951111	23.166667	1000 ft.	moist high forest	30-VII-1969	K.V. Gadow 1 (PRE)	1
Carex lancea (Thunb.) Baill.	South Africa: Western Cape Province, Knysna, Diepwalle, Oudebrandt	-33.951111	23.166667	1350 ft.	moist high forest	14-X-1969	K.V. Gadow 11 (PRE)	1
Carex lancea (Thunb.) Baill.	South Africa: Western Cape Province, Kogelberg Forest Reserve	-34.283333	18.904167	c. 275 m.	growing amongst rocks in forest	28-IX-1971	C. Boucher 1622 (PRE)	1
Carex lancea (Thunb.) Baill.	South Africa: Western Cape Province, Kirstenbosch	-33.98	18.42		shady places in natural forest	20-VI-1937	M.R.Levyns 6260 (BOL)	1
Carex lancea (Thunb.) Baill.	South Africa: Western Cape Province, Kirstenbosch, Nursery gorge	-33.98	18.42		shade	19-X-1924	R.H. Compton s.n. (BOL)	1
Carex lancea (Thunb.) Baill.	South Africa: Western Cape Province, Lions Head	-33.926111	18.389167				PRE-0106372	1
Carex lancea (Thunb.) Baill.	South Africa: Western Cape Province, Malmebsbury, Paardeberg	-33.60	18.81		moist area in slopes	29-IX-1974	E. Esterhuysen 33630 (BOL)	1
Carex lancea (Thunb.) Baill.	South Africa: Western Cape Province, Mountain Ravine above Kirstenbosch	-33.986667	18.436944			17-VIII-1928	J. Hutchinson 17 (BOL, PRE)	2
Carex lancea (Thunb.) Baill.	South Africa: Western Cape Province, Riversdale	-34.011289	21.239444			29-X-1924	J. Muir 3428 (PRE)	1
Carex lancea (Thunb.) Baill.	South Africa: Western Cape Province, Riviersonderend Mountains	-34.128056	19.92	500-2000 ft.	on mountain ridges	V-1881	C. Clarke 4442 (K)	1
Carex lancea (Thunb.) Baill.	South Africa: Western Cape Province, Robertson	-33.7	19.8	1000 ft.	streamside	X-1929	M.R. Levyns 2821 (BOL)	1
Carex lancea (Thunb.) Baill.	South Africa: Western Cape Province, Langeberg, Tradouw Pass	-33.97	20.70	300 m	fynbos	18-VIII-2006	A.M. Muasya 2934 & E. Knox (BOL, UPOS)	2
Carex lancea (Thunb.) Baill.	South Africa: Western Cape Province, Stelenbosch, Jonkershoek					13-VIII-1946	R.G. Strey 603 (PRE)	1
Carex lancea (Thunb.) Baill.	South Africa: Western Cape Province, Stellenbosch	-34.04	18.86	600 m.	in moist shady forest	26-VII-1942	R.N. Parker 3699 (BOL, K)	2
Carex lancea (Thunb.) Baill.	South Africa: Western Cape Province, Jonkershoek Nature Reserve	-34.025	18.98	516 m.	edge of waterfall	22-VIII-2006	A.M. Muasya 2962 (BOL, UPOS)	2
Carex lancea (Thunb.) Baill.	South Africa: Western Cape Province, Stellenbosch, Helderberg	-34.04	18.86	600 m.	shaded stream	14-IX-1947	R.N. Parker 4250 (BOL)	1
Carex lancea (Thunb.) Baill.	South Africa: Western Cape Province, Stellenbosch, Langrivier, Jonkershoek	-33.961944	18.930278	2000 ft.	riparian or moist shady sites	VII-1965	O. Kerfoot 1338 (PRE)	1
Carex lancea (Thunb.) Baill.	South Africa: Western Cape Province, Stellenbosch, Swartboschkloof, Jonkershoek	-34.000556	18.953889		along seasonal watercourse through forest	05-X-1982	D.J. McDonald 829 (K)	1
Carex lancea (Thunb.) Baill.	South Africa: Western Cape Province, Swellendam			500-2000 ft.			Zeyher 4442 (P)	1
Carex lancea (Thunb.) Baill.	South Africa: Western Cape Province, Table Mountain				slopes	VII-1917	M.M. Page s.n. (BOL)	1
Carex lancea (Thunb.) Baill.	South Africa: Western Cape Province, Table Mountain						C.F. Ecklon 857 (PRE)	1
Carex lancea (Thunb.) Baill.	South Africa: Western Cape Province, Table Mountain						R.H. Marloth s.n. (PRE-39088)	1
Carex lancea (Thunb.) Baill.	South Africa: Western Cape Province, Table Mountain, Back Table	-33.9	18.4	780 m.	rocks in shade	1-XII-2002	G.A. Verboom 622 (BOL)	1
Carex lancea (Thunb.) Baill.	South Africa: Western Cape Province, Table Mountain, Devil's Peak	-33.95	18.44		along mountain courses	IV-1923	I.B. Pole-Evans 729 (BOL)	1
Carex lancea (Thunb.) Baill.	South Africa: Western Cape Province, Table Mountain, Orangekloof	-34.00	18.39		in damp shade	13-IX-1955	T.M. Salter 9631 (BOL)	1
Carex lancea (Thunb.) Baill.	South Africa: Western Cape Province, Tafelberg	-33.962.894	18.409805			01-XIII-1826	Drège s.n. (P-01671265)	1
Carex lancea (Thunb.) Baill.	South Africa: Western Cape Province, Tradouw Pass	-33.97	20.70	1200 ft.	shady places near waterfall	X-1923	M.R. Levyns 692 (BOL)	1
Carex lancea (Thunb.) Baill.	South Africa: Western Cape Province, Tradouw Pass	-33.97	20.70	1700 ft.	damp place	27-VII-1954	M.R. Levyns 10105 (BOL)	1
Carex lancea (Thunb.) Baill.	South Africa: Western Cape Province, Wilderness, Sendero Brown Hooded Kingfisher	-33.983694	22.651	24 - 52 m.	afromontane forest	14-X-2017	J.I. Márquez-Corro et al. 204JMC17 (UPOS)	1
Carex lancea (Thunb.) Baill.	South Africa: Western Cape Province, Witte els Bosch	-34.02	23.95	850 ft.	in forest	IX-1920	H.G. Fourcade 917 (BOL)	1
Carex ludwigii (Hochst.) Luceño & Martín-Bravo	South Africa: in Cap. buona Spei					1837	Ludwig s.n. (TUB-007504) holotype; (M-0110633), (TUB007503) isotypes	3
Carex ludwigii (Hochst.) Luceño & Martín-Bravo	South Africa: "Cap. buona Spei"				in loci rupestribus		Drège 7399a (P-00461997) lectotype of Schoenoxiphium dregeanum; (P-00540803) isotype	2
Carex ludwigii (Hochst.) Luceño & Martín-Bravo	South Africa						Drège 7399c (LE-00010146), Drège s.n. (P-00461998) syntypes of Schoenoxiphium dregeanum	2
Carex ludwigii (Hochst.) Luceño & Martín-Bravo	South Africa: Eastern Cape Province, Winterberge, Katrivier			2000-3000 ft.			Ecklon & Zeyher (S-10-1122) lectotype of Schoenoxiphium rufum, (G-00195305) isotype of Schoenoxiphium rufum	2
Carex ludwigii (Hochst.) Luceño & Martín-Bravo	South Africa: Eastern Cape Province						Drège s.n. (S-08-6967)	1
Carex ludwigii (Hochst.) Luceño & Martín-Bravo	South Africa: Eastern Cape Province, Stormberg						Drège s.n. ((HAL-0109860)	1
Carex ludwigii (Hochst.) Luceño & Martín-Bravo	South Africa: Cap. b. Spei						Drège s.n. (LE-00010145)	1
Carex ludwigii (Hochst.) Luceño & Martín-Bravo	South Africa						Drège s.n. (P-00461999)	1
Carex ludwigii (Hochst.) Luceño & Martín-Bravo	South Africa						Drège s.n. (TUB-007502)	1
Carex ludwigii (Hochst.) Luceño & Martín-Bravo	South Africa: Eastern Cape Province, Queenstown rivier			5000-6000 ft.		1840	Drège 3126 (K)	1
Carex ludwigii (Hochst.) Luceño & Martín-Bravo	Lesotho ("Basutoland")						A. Vritarleu 759 (K)	1
Carex ludwigii (Hochst.) Luceño & Martín-Bravo	Lesotho: Berea dsitrict, near Mapoteng	-29.14	27.97		S. facing slope near rock	23-XI-1974	M. Schmitz 4508 (PRE)	1
Carex ludwigii (Hochst.) Luceño & Martín-Bravo	Lesotho: Leribe District, Hlotse	-29.055122	28.345483	2086 m.	stream edge near a waterfall	13-I-2014	T. Villaverde 1TVH14 et al. (UPOS)	1
Carex ludwigii (Hochst.) Luceño & Martín-Bravo	Lesotho: Leribe District, Pitseng	-29.062084	28.362620	2359 m.	stream edge	14-I-2014	T. Villaverde 51TVH14 et al. (UPOS)	1
Carex ludwigii (Hochst.) Luceño & Martín-Bravo	Lesotho: Leribe District, Pitseng	-29.06926	28.391701	2821 m.	road side	14-I-2014	T. Villaverde 40TVH14 et al. (UPOS)	1
Carex ludwigii (Hochst.) Luceño & Martín-Bravo	Lesotho: Maseru District, Bushman's Pass	-29.42130277	27.8689027	7000 ft.	damp ground on slope	14-I-1979	O.M. Hilliard & B.L. Burtt 12126 (NU)	1
Carex ludwigii (Hochst.) Luceño & Martín-Bravo	Lesotho: Maseru District, Mamtani road			8000 ft.		5-I-1970	C. Williamson 508 (K)	1
Carex ludwigii (Hochst.) Luceño & Martín-Bravo	Lesotho: Maseru District, mountain road, near Moloimo Nthuse hotel	-29.419788	27.70		basalt slope, plated with trees, near river	I-1979	M. Schmitz 8533 (PRE)	1
Carex ludwigii (Hochst.) Luceño & Martín-Bravo	Lesoto: Maseru District, Maletsunyane	-29.876305	28.050117	2307 m.	wet meadow	17-I-2014	T. Villaverde 108TVH14 et al. (UPOS)	1
Carex ludwigii (Hochst.) Luceño & Martín-Bravo	South Africa: Eastern Cape Province, Aasvoelkrans, Stockdale farm, behind Pearston,	-32.4655	25.244722	1800 m.	on edges of cliffs	31-X-2006	V.R. Clark 295 & S. Ramdhani (GRA)	1
Carex ludwigii (Hochst.) Luceño & Martín-Bravo	South Africa: Eastern Cape Province, Aberdeen District, Kamdebooberge, SE slopes of Goewermentsberg	-32.45	23.91	1421 m.	open shrubland	4-IV-2008	V.R. Clark 179 & I. Crause (BOL)	1
Carex ludwigii (Hochst.) Luceño & Martín-Bravo	South Africa: Eastern Cape Province, Asanta Sana Private Game Reserve, Sneeuberg, above Suurkloof	-32.25	25.00	2000 m	near massive dolerite cliffs	06-XII-2005	V.R. Clark 217 & G. Coombs (GRA)	1
Carex ludwigii (Hochst.) Luceño & Martín-Bravo	South Africa: Eastern Cape Province, Barkly East District, Old lady-Grey road, above Kraairiver	-30.91459	27.297800	5600 ft.	slopes basalts cliffs	20-XI-1981	O.M. Hilliard & B.L. Burtt 14573 (NU)	1
Carex ludwigii (Hochst.) Luceño & Martín-Bravo	South Africa: Eastern Cape Province, Boschberg	-32.7	25.5	4500 ft.	in sylvis		BOL45250	1
Carex ludwigii (Hochst.) Luceño & Martín-Bravo	South Africa: Eastern Cape Province, Farm: 30Km SNW of Elliot on road to Tsomo valley, near Otto du Plessis Pass	-31.24	27.53	1860 m.	sub-alpine grassland. Well-drained humic soil. Drakensberg basalt. Partly sun. Moderate slope. Aspect: E. Grazed by cattle -not badly disturbed.		S.P. Bester 2754 (NU)	1
Carex ludwigii (Hochst.) Luceño & Martín-Bravo	South Africa: Eastern Cape Province, Koueveldberge, Onbedacht Farm	-32.16	24.05	1600 m.	in shade of bush	21-XI-2006	V.R. Clark 157 & T. Te Water Naude (BOL)	1
Carex ludwigii (Hochst.) Luceño & Martín-Bravo	South Africa: Eastern Cape Province, pr. Rhodes	-30.719166	27.9575	2040 m.	stream edge in scrub	17-I-2008	C. Aedo 15168 et al. (UPOS)	1
Carex ludwigii (Hochst.) Luceño & Martín-Bravo	South Africa: Eastern Cape Province, Rhodes	-30.7496	27.9580	1900 m.		I-2006	Sieben s.n. et al. (UPOS)	1
Carex ludwigii (Hochst.) Luceño & Martín-Bravo	South Africa: Free State Province, Bethlehem, Hlotse Adit.	-28.5	28.4		side of stream	10-XII-1991	Browning 446 (NU)	1
Carex ludwigii (Hochst.) Luceño & Martín-Bravo	South Africa: Free State Province, Golden Gate Highlands National Park	-28.505568	28.617467	1800-2000 m.	grassland in Leucosidea sericea scrub	12-XII-2008	M. Luceño 65ML08 et al. (UPOS)	1
Carex ludwigii (Hochst.) Luceño & Martín-Bravo	South Africa: Free State Province, Golden Gate Highlands National Park	-28.5502722	28.6118722	2200 m.		1-I-1963	L.C.C. Liebenberg 6813 (PRE)	1
Carex ludwigii (Hochst.) Luceño & Martín-Bravo	South Africa: KwaZulu-Natal Province, Bergville District, R.N.N.P., path from Tendele camp to Tigers Falls				forest patch, damp ground	3-II-1982	O.M. Hilliard & B.L. Burtt 15407 (NU)	1
Carex ludwigii (Hochst.) Luceño & Martín-Bravo	South Africa: KwaZulu-Natal Province, Bulwer Mt.					XI-2000	T. Edwards 2229 (NU)	1
Carex ludwigii (Hochst.) Luceño & Martín-Bravo	South Africa: KwaZulu-Natal Province, Bushman's River. 1 1/2 ml. upstream from Giants Castle Rest Camp.	-29.301400	29.510729	5700 ft.	edge of stream	25-X-1968	F. B. Wright 663 (NU)	1
Carex ludwigii (Hochst.) Luceño & Martín-Bravo	South Africa: KwaZulu-Natal Province, Bushman's Nek, path to fire tower			6300 ft.	steep grass slope	16-XI-1985	O.M. Hilliard & B.L. Burtt 18592 (NU)	1
Carex ludwigii (Hochst.) Luceño & Martín-Bravo	South Africa: KwaZulu-Natal Province, Cathedral Peak, Orange Peel Gap	-28.940444	29.198444	2643 m.	wet rock	11-XI-2012	E. Maguilla 64EMS12 et al. (UPOS)	1
Carex ludwigii (Hochst.) Luceño & Martín-Bravo	South Africa: KwaZulu-Natal Province, Cathedral Peak area, patch of natural montane forest around the chalet	-28.937833	29.1844166	1372 m.	shaddy places in small copse.	20-X-2006	B. Gehrke BG-Af469 et al. (Z)	1
Carex ludwigii (Hochst.) Luceño & Martín-Bravo	South Africa: KwaZulu-Natal Province, Cathedral Peak	-28.9380	29.2566	1400 m.	floodplain	III-2006	Sieben MDO645 (UPOS)	1
Carex ludwigii (Hochst.) Luceño & Martín-Bravo	South Africa: KwaZulu-Natal Province, Cobham Forest Reserve, Sipongweni	-29.70	29.38	6600 ft.	in moist ground around Leucosidea at foot of cliffs	23-II-1981	O.M. Hilliard & B.L. Burtt 14148 (NU)	1
Carex ludwigii (Hochst.) Luceño & Martín-Bravo	South Africa: KwaZulu-Natal Province, Drakensberg range, Cathedral Peak area, Didima Camp, path to Rainbow Gorge	-28.750302	29.211856	1550 m.	path edge and shady grassland	13-XII-2011	S. Martín-Bravo & M. Luceño 102SMB11 (UPOS)	1
Carex ludwigii (Hochst.) Luceño & Martín-Bravo	South Africa: KwaZulu-Natal Province, Drakensberg range, Cathedral Peak hotel, path to Cathedral Peak, Mlambonja river	-28.9449	29.2997		open scrub of Leucosidea sericea on sandy river soils	14-XI-2011	S. Martín-Bravo & M. Luceño 123SMB11 (UPOS)	1
Carex ludwigii (Hochst.) Luceño & Martín-Bravo	South Africa: KwaZulu-Natal Province, Cathedral Peak, Mikes Pass	-28.9971	29.3237	1960 m.	grassland near stream	15-I-2008	A.M. Muasya 3723 & C.H. Stirton (BOL, UPOS)	2
Carex ludwigii (Hochst.) Luceño & Martín-Bravo	South Africa: KwaZulu-Natal Province, Drakensberg range, Garden Castle Forest Reserve	-29.759166	29.213488	1800 m.	open scrub of Leucosidea sericea on sandy river soils	11-XI-2011	S. Martín-Bravo & M. Luceño 118SMB11 (UPOS)	1
Carex ludwigii (Hochst.) Luceño & Martín-Bravo	South Africa: KwaZulu-Natal Province, Drakensberg, Garden Castle Forest Reserve	-29.731972	29.183111	2000 m.	path edge and grassland	19-XI-2010	S. Martín-Bravo 147SMB10 et al. (UPOS)	1
Carex ludwigii (Hochst.) Luceño & Martín-Bravo	South Africa: KwaZulu-Natal Province, Estcourt District, Kamberg.	-29.335047	29.602952	6950 ft.		28-II-1974	F.B. Wright 1981 (NU)	1
Carex ludwigii (Hochst.) Luceño & Martín-Bravo	South Africa: KwaZulu-Natal Province, Garden Castle Forest Reserve	-29.75035	29.212066	1810 m.	grassland	16-XII-2008	M. Luceño 106ML08 et al. (UPOS)	1
Carex ludwigii (Hochst.) Luceño & Martín-Bravo	South Africa: KwaZulu-Natal Province, Garden Castle Forest Reserve	-29.1145	29.630972	1566 m.	edge of stream	10-XI-2012	E. Maguilla 48EMS12 et al. (UPOS)	1
Carex ludwigii (Hochst.) Luceño & Martín-Bravo	South Africa: KwaZulu-Natal Province, Garden Castle Forest Reserve	-29.750305	29.211972	1803 m.	edge of stream	16-XI-2012	E. Maguilla 78 EMS12 (UPOS)	1
Carex ludwigii (Hochst.) Luceño & Martín-Bravo	South Africa: KwaZulu-Natal Province, Giant Castle Game Reserve	-29.32005	29.477666		watrcourse below small waterfall	4-II-1985	C. Reid 982 (PRE)	1
Carex ludwigii (Hochst.) Luceño & Martín-Bravo	South Africa: KwaZulu-Natal Province, Glen Almond-Betmore bounday	-29.97	29.12	6200 ft.	shade of Olinia wood	9-I-1986	O.M. Hilliard & B.L. Burtt 19014 (NU)	1
Carex ludwigii (Hochst.) Luceño & Martín-Bravo	South Africa: KwaZulu-Natal Province, Hlateimba valley, Memela			5900 ft.	on ground in water open Leucoidea path by river	14-I-1982	O.M. Hilliard & B.L. Burtt 15133 (NU)	1
Carex ludwigii (Hochst.) Luceño & Martín-Bravo	South Africa: KwaZulu-Natal Province, Mpendhle District, Loteni River Valley	-29.419788	29.50	5900 ft.	forest floor	13-I-1980	O.M. Hilliard & B.L. Burtt 15088 (NU)	1
Carex ludwigii (Hochst.) Luceño & Martín-Bravo	South Africa: KwaZulu-Natal Province, Mpendhle District, Roteni Nature Reserve, Nganddwini Valley	-29.470511	29.575577	6000 ft.	wet grassy slopes near waterfall	25-XII-1978	O.M. Hilliard & B.L. Burtt 11836 (NU)	1
Carex ludwigii (Hochst.) Luceño & Martín-Bravo	South Africa: KwaZulu-Natal Province, Lion's River, Kamberg	-29.335313	29.652405	6300 ft.	growing in small marsh in south facing slope	17-XI-1975	F.B. Wright 2263 (NU)	1
Carex ludwigii (Hochst.) Luceño & Martín-Bravo	South Africa: KwaZulu-Natal Province, Maloti-Drakensberg Park World Heritage Site, Monks Cowl	-29.05	29.40	1500-1750 m.	grassland	14-XII-2008	M. Luceño 83ML08 et al. (UPOS)	1
Carex ludwigii (Hochst.) Luceño & Martín-Bravo	South Africa: KwaZulu-Natal Province, midlands				damp krantzes	II-1926	H. Ewiese s.n. (BOL)	1
Carex ludwigii (Hochst.) Luceño & Martín-Bravo	South Africa: KwaZulu-Natal Province, New Hannover District near Georgenau Mission	-29.4	30.5			26-XII-1955	F. Bayer s.n. (NU)	1
Carex ludwigii (Hochst.) Luceño & Martín-Bravo	South Africa: KwaZulu-Natal Province, Ngnangwane river, Drakensberg Garden Hotel	-29.750122	29.223916	1794 m.	tussocky streams/river margins on banks	9-XI-2009	A.M. Muasya 3675 & C.H. Stirton (BOL, UPOS)	2
Carex ludwigii (Hochst.) Luceño & Martín-Bravo	South Africa: KwaZulu-Natal Province, Polela District, "Sunset" farm	-29.863888	29.8	6000 ft.	in damp shade at edge of track	XII-1979	M.A. Rennie1029 (NU)	1
Carex ludwigii (Hochst.) Luceño & Martín-Bravo	South Africa: KwaZulu-Natal Province, prope Kokstad	-30.5	29.4	5000 ft.	in humidis	XII-1883	V. Tyson 1846 (BOL)	1
Carex ludwigii (Hochst.) Luceño & Martín-Bravo	South Africa: KwaZulu-Natal Province, Royal Natal National Park, Tugela gorge, above Chain ladder	-28.742005	28.9143722	6100 ft.	edge of scrub above river	6-II-1982	O.M. Hilliard & B.L. Burtt 15450 (NU)	1
Carex ludwigii (Hochst.) Luceño & Martín-Bravo	South Africa: KwaZulu-Natal Province, Rusdal farm, 3 km E of Verkykerskop	-27.917675	29.324263	1800 m.		21-II-1992	H.C. Eckhardt 246 (NU)	1
Carex ludwigii (Hochst.) Luceño & Martín-Bravo	South Africa: KwaZulu-Natal Province, Ukhahlamba Drakensberg Park, Bushman's Nek, path to Tarn Cave	-29.863888	29.1419444	2400 m.	small stream	19-XII-2008	B. Gehrke & M. Pirie BG572 (UPOS)	1
Carex ludwigii (Hochst.) Luceño & Martín-Bravo	South Africa: KwaZulu-Natal Province, Underberg District, Chameleon Cave area, c. 5 miles N. of Castle View farm	-29.713714	29.304833	6700 ft.	shady ground among rocks	02-XII-1984	O.M. Hilliard & B.L. Burtt 17803 (NU)	1
Carex ludwigii (Hochst.) Luceño & Martín-Bravo	South Africa: KwaZulu-Natal Province, Underberg District, Cobham F.R., upper Polela	-29.7386972	29.650655	6800 ft.	wet grassy streambank	14-II-1979	O.M. Hilliard & B.L. Burtt 12525 (NU)	1
Carex ludwigii (Hochst.) Luceño & Martín-Bravo	South Africa: KwaZulu-Natal Province, Underberg District, Cobham State Forest, Emerald Vale	-29.73	29.65	6700 ft.	at forest margin	04-III-1985	O. M. Hilliard & B. L. Burtt 18311 (P)	1
Carex ludwigii (Hochst.) Luceño & Martín-Bravo	South Africa: KwaZulu-Natal Province, Underberg District, Garden Castle Forest Reserve	-29.744091	29.206178		damp loose soil behind waterfall under sandstone overhange	5-XII-1980	O.M. Hilliard & B.L. Burtt 13844 (NU)	1
Carex ludwigii (Hochst.) Luceño & Martín-Bravo	South Africa: KwaZulu-Natal Province, Underberg District, Garden Castle Forest Reserve	-29.744091	29.206178	6400 ft.	stream valley beyond forester's house	4-XII-1982	O.M. Hilliard & B.L. Burtt 17925 (NU)	1
Carex ludwigii (Hochst.) Luceño & Martín-Bravo	South Africa: KwaZulu-Natal Province, Underberg District, Gxalingenwa valley, between Sani Pass and Polela valley	-29.7089568	29.3884765	6700 ft.		10-XII-1983	O.M. Hilliard & B.L. Burtt 17134 (NU)	1
Carex ludwigii (Hochst.) Luceño & Martín-Bravo	South Africa: KwaZulu-Natal Province, Underberg District, Cobham Forest Station, Ndlovini, Troutbeck				foot of sandstone cliff	8-XI-1980	O.M. Hilliard & B.L. Burtt 13332 (NU)	1
Carex ludwigii (Hochst.) Luceño & Martín-Bravo	South Africa: KwaZulu-Natal Province, Underberg District, Gxalingenwa valley, between Sani Pass and Polela valley	-29.60993	29.36850		damp S-facing slopes over sandstone tufted	11-XII-1983	O. M. Hilliard & B. L. Burtt 17185 (P)	1
Carex ludwigii (Hochst.) Luceño & Martín-Bravo	South Africa: KwaZulu-Natal Province, Underberg District, headwaters of Mlahlangubo river, near Wilson's Cave.	-29.4713	29.4163	6400 ft.		18-II-1982	O.M. Hilliard & B.L. Burtt 15162 (NU)	1
Carex ludwigii (Hochst.) Luceño & Martín-Bravo	South Africa: KwaZulu-Natal Province, Underberg District, Sani Pass	-29.594167	29.302222	6900 ft.	damp rocky bank	13-XII-1984	O.M. Hillard & B.L. Burtt 17924 (NU)	1
Carex ludwigii (Hochst.) Luceño & Martín-Bravo	South Africa: KwaZulu-Natal Province, Underberg District, Sani Pass	-29.600558	29.32435	6900 ft.	under rocks	13-XII-1984	O.M. Hilliard & B.L. Burtt 13782 (NU)	1
Carex ludwigii (Hochst.) Luceño & Martín-Bravo	South Africa: KwaZulu-Natal Province, Underberg District,5-7 miles NNW of Castle Vie Farm, headwaters of Mlahlangubo River	-29.4713	29.4163	6900 ft.		19-I-1982	O.M. Hilliard & B.L. Burtt 15161 (NU)	1
Carex ludwigii (Hochst.) Luceño & Martín-Bravo	South Africa: KwaZulu-Natal Province, Underberg; Mgeni Vlei					25-I-1992	D. Kotze 300 (NU)	1
Carex ludwigii (Hochst.) Luceño & Martín-Bravo	South Africa: KwaZulu-Natal Province, Vryheid District, Oshoek	-27.4	30.3	6400 ft.	in Leucosidea shade	8-I-1964	N.J. Devenish 1108 (K)	1
Carex ludwigii (Hochst.) Luceño & Martín-Bravo	South Africa: KwaZulu-Natal Province, Vryheid District, Oshoek	-27.4	30.3	6400-6600 ft.	grassy hillsides	24-XI-1963	N.J. Devenish 1074 (K)	1
Carex ludwigii (Hochst.) Luceño & Martín-Bravo	South Africa: KwaZulu-Natal Province, Vryheid, Slangrivier Catchment, vicinity of Groenvlei	-27.7	30.9		Leucosidea woodland in moist ground beside streamlet	27-I-1998	J. Browning 862 and 864 (NU)	1
Carex ludwigii (Hochst.) Luceño & Martín-Bravo	South Africa: KwaZulu-Natal, Bergville District Cathedral Peak, tributary of Tseketseke	-28.935713	29.136858	6900 ft.	damp scrub	18-I-1983	O.M. Hilliard & B.L. Burtt 16306 (NU)	1
Carex ludwigii (Hochst.) Luceño & Martín-Bravo	South Africa: KwaZulu-Natal, Giant's Castle	-29.2922916	29.503430	6500 ft.		XI-1914	R.E. Symons 120 (PRE)	1
Carex ludwigii (Hochst.) Luceño & Martín-Bravo	South Africa: KwaZulu-Natal, Nganangwane river, Drakensberg Garden hotel	-29.750122	29.223916	1794 m.	tussocky stream/river margins on banks	9-XI-2009	A.M. Muasya 4922 & C.H. Stirton (BOL, UPOS)	2
Carex ludwigii (Hochst.) Luceño & Martín-Bravo	South Africa: KwaZulu-Natal Province, Drakenstberg, road to Sani Pass	-29.597583	29.310333	2255 m.	stream edge	21-XI-2010	S. Martín-Bravo 162SMB10 et al. (UPOS)	1
Carex ludwigii (Hochst.) Luceño & Martín-Bravo	South Africa: KwaZulu-Natal Province, Faber's Hill	-29.68	29.93	1420 m.	valley bottom	III-2006	D. Kotze MDO1005 (UPOS)	1
Carex ludwigii (Hochst.) Luceño & Martín-Bravo	South Africa: KwaZulu-Natal Province, Mpendhle District, Mulangane ridge, above Carter's Nek	-29.4	29.7	7000-7300 ft.	wet gravely ground in Leucosidea wood	1-XII-1983	O.M. Hilliard & B.L. Burtt 17002 (NU)	1
Carex ludwigii (Hochst.) Luceño & Martín-Bravo	South Africa: Mpumalanga Province, Pilgrim, 11 m. from Graskop on road to Naalbank	-24.943825	30.826136		in vlei mt river	13-X-1947	B. de Winter & L.E. Codd 219 (K)	1
Carex ludwigii (Hochst.) Luceño & Martín-Bravo	South Africa: Mpumalanga Province, Pilgrim's Rest, Mount Sheba Nature Reserve	-25.05	30.67	1950 m.		X-1950	H. Getliffe 31 et al. (NU)	1
Carex ludwigii (Hochst.) Luceño & Martín-Bravo	South Africa: Western Cape Province, Murraysburg District, Koueveldberge, Plaas Farm	-32.15	24.03	1929 m.	open shrubland	11-V-2010	V.R. Clark 33 & M. Martín-Azorín (BOL)	1
Carex ludwigii x parvirufa	South Africa: Eastern Cape Province, pr. Rhodes	-30.719166	27.9575	2040 m.	stream edge in scrub	17-I-2008	C. Aedo 15134 (MA)	1
Carex ludwigii x parvirufa	South Africa: Eastern Cape Province, pr. Rhodes	-30.719166	27.9575	2040 m.	stream edge in scrub	17-I-2008	C. Aedo 15168 et al. (SALAF)	1
Carex ludwigii x parvirufa	South Africa: Free State Province, Golden Gate Highlands National Park	-28.499047	28.619513	2023 m.	grassland in Leucosidea sericea scrub	2014-01-20	T. Villaverde 136TVH14bis et al.	1
Carex multispiculata Luceño & Martín-Bravo	Madagascar: Diana region, Tsaratanana mountain	-14.042222	48.969167	2700 m.	in the heaths	XII-1912	Perrier de la Bâthie 2501 (P-s.n.) lecotype; (P-00540579) isotype	2
Carex multispiculata Luceño & Martín-Bravo	Eswatini: HhoHho District, Malolotja Nature Reserve	-26.15693	31.20829	1118 m.		18-X-2015		1	https://www.inaturalist.org/observations/11103002
Carex multispiculata Luceño & Martín-Bravo	Madagascar: Mahajanga region, Magindrano, Ambohimiriahavavy summit, very dry ericoïde bush, rich in Philippia	-14.2	49.108333	2000-2300 m.	grassland between rocks	20-X-2005	Martin Callmander 452 et al. (P)	1
Carex multispiculata Luceño & Martín-Bravo	South Africa: Free State Province, Zaphira, Bethlehem, Qua Qua National Park	-28.43	28.948056		in kloof, langs water	01-II-1995	P.C. Zietsam 2951 (PRE)	1
Carex multispiculata Luceño & Martín-Bravo	South Africa: Free State Province, Kerkenberg	-28.5	29.1		damp E facing grass slope	4-I-1979	O.M. Hilliard & B.L. Burtt 11929 (NU)	1
Carex multispiculata Luceño & Martín-Bravo	South Africa: KwaZulu-Natal Province, Cathedral Peak Natural Reserve, path from Didima Camp Lodge to Cathedral Peak	-28.937222	29.187611	1711 m.	stream edge	11-X1-2012	E. Maguilla et al. 53EMS12 (UPOS)	1
Carex multispiculata Luceño & Martín-Bravo	South Africa: KwaZulu-Natal Province, Cathedral Peak Natural Reserve, path from Didima Camp Lodge to Cathedral Peak, Orange Peel Gap base	-28.924722	29.167222	2161 m.	path edge, grassland	11-XI-2012	E. Maguilla et al. 56EMS12 (UPOS)	1
Carex multispiculata Luceño & Martín-Bravo	South Africa: KwaZulu-Natal Province, Cathedral Peak, Orange Peel Gap base	-28.921944	29.163056	2307 m.	stream edge	11-XI-2012	E. Maguilla et al. 68EMS12 (UPOS)	1
Carex multispiculata Luceño & Martín-Bravo	South Africa: KwaZulu-Natal Province, Cathedral Peak, Orange Peel Gap base	-28.933611	29.178694	1904 m.	stream edge	11-XI-2012	E. Maguilla et al. 66EMS12 (UPOS)	1
Carex multispiculata Luceño & Martín-Bravo	South Africa: KwaZulu-Natal Province, Drakensberg mountain range, Cathedral Peak Natural Resere, Didima Camp, path to Rainbow Gorge	-28.957611	29.228694	1550 m.	path edge, grassland in shady slope	13-XI-2011	S. Martín-Bravo & M. Luceño 116SMB11 (UPOS)	1
Carex multispiculata Luceño & Martín-Bravo	South Africa: KwaZulu-Natal Province, Drakensberg mountain range, Royal National Park, Tiger Falls	-28.693056	28.929722	1700 m.	rocky fissure near waterfall in riparian forest	16-XI-2011	S. Martín-Bravo & M. Luceño 142SMB11 (UPOS)	1
Carex multispiculata Luceño & Martín-Bravo	South Africa: KwaZulu-Natal Province, Mlambonja Wilderness area, Cathedral Peak ascent, Baker's Chalet	-28.932687	29.233056	1800-1900 m.	stream edge	20-XII-2008	S. Martín-Bravo et al. 181SMB08 (UPOS)	1
Carex multispiculata Luceño & Martín-Bravo	South Africa: KwaZulu-Natal Province, Alfred District, Weza, Ingeli slopes	-30.524571	29.691523		mount, grassvel, valley	02-I-1966	R.G. Strey 6379 (K)	1
Carex multispiculata Luceño & Martín-Bravo	South Africa: KwaZulu-Natal Province, Bergville, Cathedral Peak F.R., belong Tryme	-28.948611	29.212222	5000 ft.	amongst rocks at base, sandstone cliff	17-I-1983	O.M. Hilliard & B.L. Burtt 16270 (NU)	1
Carex multispiculata Luceño & Martín-Bravo	South Africa: KwaZulu-Natal Province, Bergville, Cathedral Peak, Forest Research Station			6050 ft.	stream banks	19-X-1950	A.J.B. Killick 1036 (NU)	1
Carex multispiculata Luceño & Martín-Bravo	South Africa: KwaZulu-Natal Province, Cathedral Area			5000 ft.	semi-shade on riverbanks	I-1946	J. Schlke 754 (NU)	1
Carex multispiculata Luceño & Martín-Bravo	South Africa: KwaZulu-Natal Province, Cathedral Peak Area, at the fishpond	-28.948611	29.196667	1530 m.	grassland next to a big stone	20-X-2006	B. Gehrke BG-Af473 (Z)	1
Carex multispiculata Luceño & Martín-Bravo	South Africa: KwaZulu-Natal Province, Cathedral Peak, Orange Peel Gap base	-28.921944	29.163056	2307 m.	stream edge	11-XI-2013	E. Maguilla et al. 67EMS12 (UPOS)	1
Carex multispiculata Luceño & Martín-Bravo	South Africa: KwaZulu-Natal Province, Drakensberg mountain range, Cathedral Peak, Mlambonja Wilderness area, ascent path to Cathedral Peak	-28.933639	29.179417	1875 m.	rock fissure in streamside	15-XI-2011	S. Martín-Bravo & M. Luceño 132SMB11 (UPOS)	1
Carex multispiculata Luceño & Martín-Bravo	South Africa: KwaZulu-Natal Province, Drakensberg mountain range, Royal KwaZulu-Natal Province National Park, path to Tiger Falls	-28.688333	29.934166	1540 m.	understory in riparian forest	16-XI-2011	S. Martín-Bravo & M. Luceño 141SMB11 (UPOS)	1
Carex multispiculata Luceño & Martín-Bravo	South Africa: KwaZulu-Natal Province, Drakensberg, Mlambonja Wilderness area, ascent path to Cathedral Peak	-28.937222	29.187611	1700 m.	slopes with high grassland in open forest area of Protea sp., path edges, near rocky cliff	17-XI-2010	S. Martín-Bravo et al. 129SMB10 (UPOS)	1
Carex multispiculata Luceño & Martín-Bravo	South Africa: KwaZulu-Natal Province, Drakensberg, Weenen			8000 ft.	bank of rocky dry water course in gully	VII-1951	E. Esterhuysen 18664 (BOL)	1
Carex multispiculata Luceño & Martín-Bravo	South Africa: KwaZulu-Natal Province, Kokstad, Weza, Mt. Ingeli	-30.524571	29.691523		streamside	17-III-1973	H.B. Nicholson 1216 (PRE)	1
Carex multispiculata Luceño & Martín-Bravo	South Africa: KwaZulu-Natal Province, Mlambonja Wilderness area, Cathedral Peak ascent, towards Bell			2800 m.	grassland in rocky gorge	20-XII-2008	S. Martín-Bravo et al. 188SMB08 (UPOS)	1
Carex multispiculata Luceño & Martín-Bravo	South Africa: KwaZulu-Natal Province, Mlambonja Wilderness area, Cathedral Peak ascent, towards Bell			2800 m.	grassland in rocky gorge	20-XII-2008	S. Martín-Bravo et al. 190SMB08 (UPOS)	1
Carex multispiculata Luceño & Martín-Bravo	South Africa: KwaZulu-Natal Province, Royal KwaZulu-Natal Province National Park, Tiger Falls	-28.695556	28.930833	5500 ft.	forest patch	03-XI-1982	O.M. Hilliard & B.L. Burtt 15406 (NU)	1
Carex multispiculata Luceño & Martín-Bravo	South Africa: Mpumalanga Province, Mariepskop, Klaserie Waterfall	-24.568611	30.9025	± 5000 ft.	damp places at waterfall	29-V-1960	R.N. Schifft 5136 (K)	1
Carex multispiculata Luceño & Martín-Bravo	South Africa: Mpumalanga Province, Morgenzon Natural Reserve	-24.856647	30.728713	1800 m.	bushy grassland	27-XI-1978	J.P. Kluge 1428 (PRE)	1
Carex multispiculata Luceño & Martín-Bravo	South Africa: Mpumalanga Province, Mount Sheba Natural Reserve, Pilgrim's Rest	-24.934444	30.717778			I-1976	Forrester & Gooyer 10 (NU-0002656)	1
Carex multispiculata Luceño & Martín-Bravo	South Africa: Mpumalanga Province, Barberton District, Thornkroft Nature Reserve	-25.8	30.9	1300 m.		17-I-1972	P.J. Müller 2344 (PRE)	1
Carex perdensa (Kukkonen) Luceño & Martín-Bravo	South Africa: Eastern Cape Province, King william's Town, Keiskammahoek area	-32.75	27.07	4000 ft.	amongst grasses	XII-1925	R.A. Dyer 245a (K-000693793) holotype; (K-000693794), (PRE-0106552) isotypes	3
Carex perdensa (Kukkonen) Luceño & Martín-Bravo	South Africa: KwaZulu-Natal Province, Estcourt District, Tabamhlope Table Mountain	-29.12	29.65	6000-6300 ft.	craggy places on upper N slopes	26-IV-1945	J.R.H. Acocks 11463 (BM-000922722), (K-000363521) paratypes	2
Carex perdensa (Kukkonen) Luceño & Martín-Bravo	South Africa: KwaZulu-Natal Province, Bushman's Nek	-29.8358	29.1855	1790 m.	grassland	18-XII-2008	M. Luceño 120ML08 et al. (UPOS)	1
Carex perdensa (Kukkonen) Luceño & Martín-Bravo	South Africa: KwaZulu-Natal Province, Bushman's Nek	-29.8410	29.2163	1804 m.	grassland	15-IX-2012	E. Maguilla 74EMS12 et al. (UPOS)	1
Carex perdensa (Kukkonen) Luceño & Martín-Bravo	South Africa: KwaZulu-Natal Province, Cathedral Peak	-28.9877	29.2192	1907 m.	grassland	2008-01-15	A.M. Muasya 3719 & C.H. Stirton (BOL, UPOS)	2
Carex perdensa (Kukkonen) Luceño & Martín-Bravo	South Africa: KwaZulu-Natal Province, Cathedral Peak Forest Reserve	-28.93	29.17	1900 m.		19-II-1989	Everson 371 (NU)	1
Carex perdensa (Kukkonen) Luceño & Martín-Bravo	South Africa: KwaZulu-Natal Province, Drakensberg range, Garden Castle Forest Reserve	-29.74	29.20	1920 m.	grassland	16-XII-2008	M. Luceño 98ML08 et al. (UPOS)	1
Carex perdensa (Kukkonen) Luceño & Martín-Bravo	South Africa: KwaZulu-Natal Province, Drakensberg Garden Hotel	-29.75	29.21	1700 m.	recently burn open grassland, on coarse sandy soil	08-II-1982	P. Goetghebeur 4527	1
Carex pseudorufa Luceño & Martín-Bravo	South Africa; KwaZulu-Natal Province, Underberg District			6700 ft.	streamside	2-XII-1984	O.M. Hilliard 17812 & B.L. Burtt (E-00200232); (GENT-0000090032820, 0000090032844 and 0000090032943),( NU-0015687) isotypes	5
Carex pseudorufa Luceño & Martín-Bravo	South Africa: KwaZulu-Natal Province, Cathedral Peak area, path to Cathedral Peak	-28.92216	29.16324	2307 m.	grassland	11-XI-2012	E. Maguilla 59EMS12 et al. (UPOS)	1
Carex pseudorufa Luceño & Martín-Bravo	South Africa: KwaZulu-Natal Province, Drakensberg range, Cathedral Peak, Mlambonja Wilderness area, path to Cathedral Peak, Orange Peel Gap	-28.92216	29.16286	2300 m.	grassland in shady slope	15-XI-2011	S. Martín-Bravo 139SMB11 & M. Luceño (UPOS)	1
Carex pseudorufa Luceño & Martín-Bravo	South Africa: KwaZulu-Natal Province, Drakensberg range, Garden Castle Forest Reserve, path to Rhino Peak	-29.73275	29.18480	1980 m.	streamside	11-XI-2011	S. Martín-Bravo 97SMB11 & M. Luceño (UPOS)	1
Carex pseudorufa Luceño & Martín-Bravo	South Africa: KwaZulu-Natal Province, Drakensberg range, Garden Castle Forest Reserve, path to Rhino Peak	-29.73275	29.18480	1980 m.	stream edge	19-XII-2010	S. Martín-Bravo 148SMB10 & M. Luceño (UPOS)	1
Carex pseudorufa Luceño & Martín-Bravo	South Africa: KwaZulu-Natal Province, Mpendhle District, Mulangane, above Carter's Nek	-29.5	29.8	6200 ft.	streambank on mountain side	19-XI-1985	O. M. Hilliard & B. L. Burtt 18609 (NU)	1
Carex pseudorufa Luceño & Martín-Bravo	South Africa: KwaZulu-Natal Province, Mont aux Sources	-28.77	28.88	3000-3200 m.		3 to 8-IV-1934	H. Humbert 15274 (P)	1
Carex pseudorufa Luceño & Martín-Bravo	South Africa: KwaZulu-Natal Province, path to Rhino Peak from Hermit's wood	-29.73333	29.18652	1991 m.	grassland	16-XI-2012	E. Maguilla 85EMS12 et al. (UPOS)	1
Carex pseudorufa Luceño & Martín-Bravo	South Africa: KwaZulu-Natal Province, Ukhahlamba Drakensberg Park, Garden Castle Forest Reserve, path to Rhino Peak, near first river crossing below Pillar Cave	-29.72527	29.17305	2188 m.	rocky slope in deep valley	16-XII-2008	B. Gehrke & M. Pirie BG567 (UPOS)	1
Carex pseudorufa Luceño & Martín-Bravo	South Africa: KwaZulu-Natal Province, Underberg District, Garden Castle Forest Reserve, Mlambonja Valley			6200 ft.	damp grassy ground at foot od shady cliff by river	6-I-1982	O. M. Hilliard & B. L. Burtt 14974 (H, NU)	2
Carex pseudorufa Luceño & Martín-Bravo	South Africa: KwaZulu-Natal Province, Underberg District, Bamboo Mt., S. side above Restmount			6000 ft.	damp grassland at foot of sandstone cliff	20-XI-1982	O. M. Hilliard & B. L. Burtt 15574 (NU)	1
Carex pseudorufa Luceño & Martín-Bravo	South Africa: KwaZulu-Natal Province, Underberg District, Cobham Fores Reserve, "Lakes" Cave area			7000 ft.	streamside	13-XII-1982	O. M. Hilliard & B. L. Burtt 16014 (NU)	1
Carex pseudorufa Luceño & Martín-Bravo	South Africa: KwaZulu-Natal Province, Underberg District, Cobham Forest Reserve, upper Polela Cave area			6900 ft.	grass slopes on streamside	14-XII-1979	O. M. Hilliard & B. L. Burtt 12527 (NU)	1
Carex pseudorufa Luceño & Martín-Bravo	South Africa: KwaZulu-Natal Province, Underberg District, Gxalingenwa valley, between Sani Pass and Polela valley	-29.60993	29.36850	6400 ft.	open places in Leucosidea wood	10-XII-1983	O. M. Hilliard & B. L. Burtt 17154 (NU)	1
Carex pseudorufa Luceño & Martín-Bravo	South Africa: KwaZulu-Natal Province. Underberg District, Bamboo Mt.	-29.74077	29.35187	6700 ft.	steep rough damp slope below sandstone cliff	21-XI-1982	O. M. Hilliard & B. L. Burtt 15611 (NU)	1
Carex pseudorufa Luceño & Martín-Bravo	South Africa: KwaZulu-Natal Province. Underberg District, vicinity of Tarn Cave, above Bushman's Nek	-29.77584	29.29012	8000 ft.	damp gully slope. Bright rusty brown flower clusters	21-XI-1983	O. M. Hilliard & B. L. Burtt 16852 (NU)	1
Carex schweickerdtii (Merxm. & Podlech) Luceño & Martin Bravo	South Africa: Mpumalanga Province, Mariepskop			2000 m.		5-XII-1957	H. Merxmüller 590 (M-0110634) holotype; (PRE-0107827) isotype	2
Carex schweickerdtii (Merxm. & Podlech) Luceño & Martin Bravo	Lesotho: Butha Buthe District	-28.8	28.7	10100 ft.	flat area near escarpment edge	25-I-1962	R. A. Lubke 315 (K)	1
Carex schweickerdtii (Merxm. & Podlech) Luceño & Martin Bravo	South Africa: Eastern Cape Province, Fort Beaufort District, Katberg	-32.455278	26.645833	1689 m.	hilll slope	10-XII-2010	V.R. Clark 346 & R.J. Daniels (GRA)	1
Carex schweickerdtii (Merxm. & Podlech) Luceño & Martin Bravo	South Africa: Eastern Cape Province, Fort Beaufort District, Katberg, Prospect Vallei 417 farm	-32.505278	26.590278	1794 m.	dense montane shrubbery and cliff communities	03-III-2011	V.R. Clark 73 & G. Keevey (GRA)	1
Carex schweickerdtii (Merxm. & Podlech) Luceño & Martin Bravo	South Africa: Eastern Cape Province, Gaika's Kop	-32.56	26.94	1500 m.	mountain grassland	25-XI-1994	B. Sonnenberg 328 (NU)	1
Carex schweickerdtii (Merxm. & Podlech) Luceño & Martin Bravo	South Africa: Eastern Cape Province, Gaika's Kop	-32.54	26.95	5500-5800 ft.	in damp patches among rocks and at foot of cliffs	13-XII-1985	O.M. Hilliard & B.L. Burtt 18808 (NU)	1
Carex schweickerdtii (Merxm. & Podlech) Luceño & Martin Bravo	South Africa: Eastern Cape Province, Mhlahlane Forest Station, NW of Umtata	-31.41	28.53		streamside rocks and cliffs at head of gorge	10-XII-1985	O.M. Hilliard & B.L. Burtt 18775 (NU)	1
Carex schweickerdtii (Merxm. & Podlech) Luceño & Martin Bravo	South Africa: Eastern Cape Province, Pirie District						T.R. Suin 922 (NU)	1
Carex schweickerdtii (Merxm. & Podlech) Luceño & Martin Bravo	South Africa: Eastern Cape Province, Ugie & Elliotregion, Mtintloni, East of Cala.	-31.568055	27.786111	1460 m.	grassland. S. aspect	30-X-1997	Victor, J. E 2374 (PRE)	1
Carex schweickerdtii (Merxm. & Podlech) Luceño & Martin Bravo	South Africa: Eastern Cape Province, Wistelsboch, SAFCOL forest				natural forest	2-II-1996	B. Sonnenberg 480 (NU)	1
Carex schweickerdtii (Merxm. & Podlech) Luceño & Martin Bravo	South Africa: KwaZulu-Natal Province, 5-7 miles NNW of Castle View farm, headwaters of Mlahlangubo river	-29.47	29.41	6800 ft.	waterfall at edge of pool on cave sandstone	25-XI-1980	O.M. Hilliard & B.L. Burtt 13641 (NU)	1
Carex schweickerdtii (Merxm. & Podlech) Luceño & Martin Bravo	South Africa: KwaZulu-Natal Province, Cathedral Peak forestry			7600 ft.	in Pentaschistis grassland behind catchment	18-XII-1952	K.D. Gordon-Gray 1882 (NU-14102)	1
Carex schweickerdtii (Merxm. & Podlech) Luceño & Martin Bravo	South Africa: KwaZulu-Natal Province, Cathedral Peak forestry			7600 ft.		18-XII-1952	D.J.B. Killick 1882 (PRE)	1
Carex schweickerdtii (Merxm. & Podlech) Luceño & Martin Bravo	South Africa: KwaZulu-Natal Province, Drakensberg Garden Hotel, up to Rhino Peark, along Mlambonja river	-29.75	29.20	2000 m.	tussocky mountain grassland	7-II-1982	P. Goetghebeur 4513 (PRE)	1
Carex schweickerdtii (Merxm. & Podlech) Luceño & Martin Bravo	South Africa: KwaZulu-Natal Province, Drakensberg range, Garden Castle Forest Reserve	-29.722028	29.167222	2267 m.	stream edge and slopes	19-XI-2010	S. Martín-Bravo 138SMB10 et al. (UPOS)	1
Carex schweickerdtii (Merxm. & Podlech) Luceño & Martin Bravo	South Africa: KwaZulu-Natal Province, Drakensberg, Beacon Buttress	-28.75	28.89	10000 ft.	dry grassland in Erica community	25-III-1946	E. Schelpe 1412 (NU)	1
Carex schweickerdtii (Merxm. & Podlech) Luceño & Martin Bravo	South Africa: KwaZulu-Natal Province, Estcourt District, Game Pass	-29.39	29.65	6000 ft.	south facing slope	17-X-1968	F. B. Wright 653 (NU)	1
Carex schweickerdtii (Merxm. & Podlech) Luceño & Martin Bravo	South Africa: KwaZulu-Natal Province, Garden Castle Forest Reserve, path to Rhino Peak	-29.722027	29.667222	2267 m.	stream edge and grassland	11-XI-2011	S. Martín-Bravo 100SMB11 & M. Luceño (UPOS)	1
Carex schweickerdtii (Merxm. & Podlech) Luceño & Martin Bravo	South Africa: KwaZulu-Natal Province, Mpendhle (Impendle) District, Mulangane ridge, above Carter's Nek	-29.4	29.7	7000-7300 ft.	damp grass slope	5-II-1984	O.M. Hilliard & B.L. Burtt 17602 (NU)	1
Carex schweickerdtii (Merxm. & Podlech) Luceño & Martin Bravo	South Africa: KwaZulu-Natal Province, Mlambonja Wilderness area, path to Cathedral Peak	-28.930319	29.148225	2800 m.	grassland	20-XII-2008	S. Martín-Bravo 189SMB08 et al. (UPOS)	1
Carex schweickerdtii (Merxm. & Podlech) Luceño & Martin Bravo	South Africa: KwaZulu-Natal Province, Mlambonja wilderness area, path to Cathedral Peak, between Sherman's cave and Orange Peel Gap	-28.930319	29.148225	1990-2200 m.	grassland	20-XII-2008	S. Martín-Bravo 185SMB08 et al. (UPOS)	1
Carex schweickerdtii (Merxm. & Podlech) Luceño & Martin Bravo	South Africa: KwaZulu-Natal Province, Mzimkhulu District, Ntsikeni nature reserve	-30.15	29.56		grassland, rocky soil, moderate slope	29-X-1993	R. Williams 1092 (PRE)	1
Carex schweickerdtii (Merxm. & Podlech) Luceño & Martin Bravo	South Africa: KwaZulu-Natal Province, Polela District, Marwaqa	-29.80	29.74	7000 ft.	among rocks on summit Koppoje	24-II-1985	M.A. Rennie 1646 (NU)	1
Carex schweickerdtii (Merxm. & Podlech) Luceño & Martin Bravo	South Africa: KwaZulu-Natal Province, Ukhahlamba Drakensberg Park, Garden Castle Forest Reserve, path to Rhino Peak	-29.728333	29.173888	2137 m.	in open grassland	16-XII-2008	B. Gehrke BG568 & M. Pirie (UPOS)	1
Carex schweickerdtii (Merxm. & Podlech) Luceño & Martin Bravo	South Africa: KwaZulu-Natal Province, Underberg District, Cobham, upper Polela	-29.73	29.65	6900 ft.	grassy slopes	14-II-1979	O.M. Hilliard & B.L. Burtt 12526 (NU)	1
Carex schweickerdtii (Merxm. & Podlech) Luceño & Martin Bravo	South Africa: KwaZulu-Natal Province, Bushman's Nek area, ca. 3 Km after main gate entrance along the river towards the east	-29.846111	29.213333	1770 m.	near riverbed in wet places	15-X-2006	B. Gherke BG-Af454 (Z)	1
Carex schweickerdtii (Merxm. & Podlech) Luceño & Martin Bravo	South Africa: KwaZulu-Natal Province, Drakensberg range, Mlambonja Wilderness area, path to Cathedral Peak.	-28.929055	29.16925	2100-2200 m.	grassland in slopes	15-XI-2011	S. Martín-Bravo 135SMB11 & M. Luceño (UPOS)	1
Carex schweickerdtii (Merxm. & Podlech) Luceño & Martin Bravo	South Africa: KwaZulu-Natal, Province Underberg District, Cobham Forest Station, Ndlovini, Troutbeck			6000 ft.	damp grass slopes	9-XI-1980	O.M. Hilliard & B.L. Burtt 13380 (NU)	1
Carex schweickerdtii (Merxm. & Podlech) Luceño & Martin Bravo	Suth Africa: KwaZulu-Natal Province, Lotheni	-29.56	29.74	1370 m.		II-2006	D. Kotze MDO444 (UPOS)	1
Carex schweickerdtii (Merxm. & Podlech) Luceño & Martin Bravo	South Africa: Mpumalanga Province, Mount Anderson	-25.082222	30.647778	2200-2450 m.		14-17-IX-1933	H. Humbert 11004 (P)	1
Carex schweickerdtii (Merxm. & Podlech) Luceño & Martin Bravo	South Africa: Mpumalanga Province, Mt Sheba, Pilgrim's rest	-24.9	30.7			18-II-1993	J. Browning 659 (NU)	1
Carex schweickerdtii (Merxm. & Podlech) Luceño & Martin Bravo	South Africa: Mpumalanga Province, Pilgrim's Rest District, Mariepskop	-29.931094	30.7139749	6300 ft.		17-XI-1958	Killick & Strey 2402 (PRE)	1
Carex schweickerdtii (Merxm. & Podlech) Luceño & Martin Bravo	South Africa: Mpumalanga Province, Pilgrim's Rest District, Mariepskop			1935 m.	between longe boulders	8-I-1962	H.H. Van der Schijff 6005 (PRE)	1
Carex schweickerdtii (Merxm. & Podlech) Luceño & Martin Bravo	South Africa: Mpumalanga Province, NW Umata, Mhlahlane Forest Station	-25.55	31.51		streamside rocks & cliffs at head of gorge	10-XII-1985	O.M. Hilliard & B.L. Burtt 18775 (NU)	1
Carex schweickerdtii (Merxm. & Podlech) Luceño & Martin Bravo	Zimbabwe: Manicaland Province, Inyanga District, Mutare	-18.190688	32.765458	2200 m.	near waterfall	9-VI-1993	J. Browning 627 (NU)	1
Carex sciocapensis Luceño, Márquez-Corro & Sánchez-Villegas	South Africa: Western Cape Province, Groenweidebos	-33.933333	22.55	300 m.	alongside road in forest dominated by Olea capensis subsp. macrocarpa, Podocarpus spp., Olinia and Pterocelastrus	03-III-1982	G.J. Geldenhuys 622 (PRE-0812903) lectoyype	1
Carex sciocapensis Luceño, Márquez-Corro & Sánchez-Villegas	South Africa						(BOL-17119)	1
Carex sciocapensis Luceño, Márquez-Corro & Sánchez-Villegas	South Africa: Eastern Cape Province, 73 km W of Humansdorp along highway R102 to Knysna	-33.98	23.97	250 m.	grassy roadside among pine plantations	07-X-1987	H.G. Fourcade 1959 (K)	1
Carex sciocapensis Luceño, Márquez-Corro & Sánchez-Villegas	South Africa: Eastern Cape Province, Humansdorp	-33.991944	24.746489	750 ft.	margins of forest	I-1922	H.G. Fourcade 1959 (BOL)	1
Carex sciocapensis Luceño, Márquez-Corro & Sánchez-Villegas	South Africa: Eastern Cape Province, Humansdorp	-34.002778	24.743889	750 ft.	margins of forest	1921	H.G. Fourcade 1451 (BOL)	1
Carex sciocapensis Luceño, Márquez-Corro & Sánchez-Villegas	South Africa: Eastern Cape Province, Humansdorp	-34.002778	24.743889		forest edge	13-X-1928	J.B. Gillett 1539 (BOL)	1
Carex sciocapensis Luceño, Márquez-Corro & Sánchez-Villegas	South Africa: Eastern Cape Province, Humansdorp	-34.002778	24.743889		forest	10-XI-1928	J.B. Gillett 2244 (BOL)	1
Carex sciocapensis Luceño, Márquez-Corro & Sánchez-Villegas	South Africa: Eastern Cape Province, Kleinrivier Wilderness	-33.62	25.24	802 m.	rocky crevices	17-XII-2009	A.M. Muasya 5214a & C.H. Stirton (BOL, UPOS)	2
Carex sciocapensis Luceño, Márquez-Corro & Sánchez-Villegas	South Africa: Eastern Cape Province, Longmore Forest Reserve	-33.826967	25.12995	475 m.	in fynbos	23-I-2009	A.M. Muasya & C.H. Stirton 3831 (BOL, UPOS)	2
Carex sciocapensis Luceño, Márquez-Corro & Sánchez-Villegas	South Africa: Eastern Cape Province, Misty Mountain Reserve, entrance	-34	23.948028	213 m.		21-XII-2009	A.M. Muasya & S. Wiswidel 5291a (BOL, UPOS)	2
Carex sciocapensis Luceño, Márquez-Corro & Sánchez-Villegas	South Africa: Western Cape Province						Ecklon 151 (MO-2128562)	1
Carex sciocapensis Luceño, Márquez-Corro & Sánchez-Villegas	South Africa: Western Cape Province, 25 km from Avontuur to Knysna via Prince Alfred's Pass	-33.860417	23.17475	329 m.	shaded forest margin	20-XII-2009	A.M. Muasya & C.H. Stirton 5285 (BOL, UPOS)	2
Carex sciocapensis Luceño, Márquez-Corro & Sánchez-Villegas	South Africa: Western Cape Province, 25 km from Avontuur to Knysna via Prince Alfred's Pass	-33.912806	23.146889	690 m.	forest margin	20-XII-2009	A.M. Muasya & C.H. Stirton 5286 (BOL, UPOS)	2
Carex sciocapensis Luceño, Márquez-Corro & Sánchez-Villegas	South Africa: Western Cape Province, Brown Hooded Kingfisher path	-33.979583	22.650591	24-52 m.	afromontane forest	14-X-2017	J.I.Márquez-Corro 193JMC17, 194JMC17, 195JMC17, 201JMC17, 202JMC17, 203JMC17 et al. (UPOS)	6
Carex sciocapensis Luceño, Márquez-Corro & Sánchez-Villegas	South Africa: Western Cape Province, Caledon District, Onrus River	-34.399167	19.215556		kloof at foot of mountain	01-XII-1951	E. Esterhuysen 19274 (BOL)	1
Carex sciocapensis Luceño, Márquez-Corro & Sánchez-Villegas	South Africa: Western Cape Province, Calitzdorp, Matjiesgoedvallei, Wiswedel's farm	-33.447883	21.739533	800 m.	along jeep track from farm house, in renosterveld	23-IX-2006	M. Muasya & S. Wiswidel 3035 (UPOS)	1
Carex sciocapensis Luceño, Márquez-Corro & Sánchez-Villegas	South Africa: Western Cape Province, Calitzdorp, Matjiesgoedvallei, Wiswedel's farm	-33.447883	21.739533	700 m.	along jeep track from farm house, in renosterveld	23-IX-2006	M. Muasya & S. Wiswidel 3034A, 3034B (UPOS)	2
Carex sciocapensis Luceño, Márquez-Corro & Sánchez-Villegas	South Africa: Western Cape Province, Cape Peninsula, Smitswinkel Bay	-34.264444	18.465556	almost 300 ft.		07-XI-1899	A.H. Wolley Dod. 2638 (BOL)	1
Carex sciocapensis Luceño, Márquez-Corro & Sánchez-Villegas	South Africa: Western Cape Province, Ceres, Baviaansberg	-33.197500	19.593333	4800 ft.	on slopes in kloof	04-XI-1962	E. Esterhuysen 29857 (BOL)	1
Carex sciocapensis Luceño, Márquez-Corro & Sánchez-Villegas	South Africa: Western Cape Province, George			200-300 m.		12-VIII-1933	H. Humbert 9877 (P)	1
Carex sciocapensis Luceño, Márquez-Corro & Sánchez-Villegas	South Africa: Western Cape Province, George, Groenkop forest	-33.96	22.54	200 m.	growing on roadside inside forest of dry type with tall, dense Trichocladus shrub layer, site almost level, soil very clayey	20-VII-1982	G.J. Geldenhuys 629 (PRE)	1
Carex sciocapensis Luceño, Márquez-Corro & Sánchez-Villegas	South Africa: Western Cape Province, Hermanus	-34.41	19.30	10 m.	growing in sandy soils amongst stones	31-VIII-1983	S.L. Williams 928 (K)	1
Carex sciocapensis Luceño, Márquez-Corro & Sánchez-Villegas	South Africa: Western Cape Province, Hout Bay	-34.020833	18.368056			I-1898	D.P.L. Wakey 3206 (K)	1
Carex sciocapensis Luceño, Márquez-Corro & Sánchez-Villegas	South Africa: Western Cape Province, Hout Bay, Victoria Road	-34.020833	18.368056				A.H. Wolley Dod. 3206 (BOL)	1
Carex sciocapensis Luceño, Márquez-Corro & Sánchez-Villegas	South Africa: Western Cape Province, Kannaland, Towerkop Nature Reserve, near Seweweekspoortrivier	-33.386213	21.408696	904-968 m.	under bushes	12-X-2017	J.I. Márquez-Corro 134JMC17, 135JMC17, 138JMC17, 142JMC17, 143JMC17, 145JMC17 et al. (UPOS)	6
Carex sciocapensis Luceño, Márquez-Corro & Sánchez-Villegas	South Africa: Western Cape Province, Karbonhelberg	-34.036111	18.321111	1000 ft.	burned slope	30-VII-1944	M.R. Levyns 7696 (BOL)	1
Carex sciocapensis Luceño, Márquez-Corro & Sánchez-Villegas	South Africa: Western Cape Province, Karbonhelberg	-34.036111	18.321111	800 ft.	bushy slopes recently burnt	18-IX-1938	M.R. Levyns 6802 (BOL, PRE)	2
Carex sciocapensis Luceño, Márquez-Corro & Sánchez-Villegas	South Africa: Western Cape Province, Knysna					VIII-1925	J. Phillips 744 (PRE)	1
Carex sciocapensis Luceño, Márquez-Corro & Sánchez-Villegas	South Africa: Western Cape Province, Knysna, Deepwalls forest near Knysna, 300 m from forest station	-33.9523	23.1537	about 500 m.	open wetlands with grasses and eagle fern	07-X-1963	J.J. Bos 729 (K)	1
Carex sciocapensis Luceño, Márquez-Corro & Sánchez-Villegas	South Africa: Western Cape Province, Knysna, Kruisvallei			c. 3000 ft.		24-X-1962	D.J.B. Killick 3492 (PRE)	1
Carex sciocapensis Luceño, Márquez-Corro & Sánchez-Villegas	South Africa: Western Cape Province, Knysna, Noetzie	-34.074444	23.129722	c. 500 ft.	false fynbos, common under trees along stream	14-9-1960	J.P.H. Acocks 21519 (K, PRE)	2
Carex sciocapensis Luceño, Márquez-Corro & Sánchez-Villegas	South Africa: Western Cape Province, Ladismith	-33.450278	21.281389	2300 ft.	slope	VII-1929	M.R. Levyns 4195 (BOL)	1
Carex sciocapensis Luceño, Márquez-Corro & Sánchez-Villegas	South Africa: Western Cape Province, Ladismith	-33.490278	21.281389	2000 ft.	slopes	04-VII-1941	M.R.Levyns 7421 (BOL)	1
Carex sciocapensis Luceño, Márquez-Corro & Sánchez-Villegas	South Africa: Western Cape Province, Laingsburg, Witteberg	-33.346111	20.506111	4000 ft.		12-X-1928	R.H. Compton 3362 (BOL)	1
Carex sciocapensis Luceño, Márquez-Corro & Sánchez-Villegas	South Africa: Western Cape Province, Laingsburg, Witteberg	-33.346111	20.855278	3500 ft.	sank slopes	004-XI-1965	E. Estehmysen 30518 (BOL)	1
Carex sciocapensis Luceño, Márquez-Corro & Sánchez-Villegas	South Africa: Western Cape Province, near Robertson	-33.800000	19.883333	1200 ft.	bushy places	04-XI-1959	M.R. Levyns 9799 (BOL)	1
Carex sciocapensis Luceño, Márquez-Corro & Sánchez-Villegas	South Africa: Western Cape Province, Bredasdorp, Pheasantshock				in gravelly, clayey soil, at base of hills	15-IX-1976	E. Esterhuysen 34375 (BOL)	1
Carex sciocapensis Luceño, Márquez-Corro & Sánchez-Villegas	South Africa: Western Cape Province, Seven Week Port, Prince Albert Air	-33.367222	21.416944	2000 ft.	shady mountain slopes	21-IX-1932	R.H. Compton 4024 (BOL)	1
Carex sciocapensis Luceño, Márquez-Corro & Sánchez-Villegas	South Africa: Western Cape Province, Swellendam, Hesquaspoort	-34.125	20.125	c. 700 ft.	fynbos, occ.	20-VII-1962	J.P.H. Acocks 22387 (PRE)	1
Carex sciocapensis Luceño, Márquez-Corro & Sánchez-Villegas	South Africa: Western Cape Province, Swellendam, Hills near of Elandspad farm	-33.9925	20.433889			15-X-1940	N.S. Pillans 9412 (BOL)	1
Carex sciocapensis Luceño, Márquez-Corro & Sánchez-Villegas	South Africa: Western Cape Province, Worcester	-33.573611	19.466944	3000 ft.	stony slopes	22-XI-1950	E. Esterhuysen 26601 (BOL)	1
Carex spartea Wahlenb.	South Africa: Capite bonae Spei						Thunberg (UPS-21933) lectotype, (SBT-10980) isotype	2
Carex spartea Wahlenb.	Ethiopia: Amhara region, Dewra Tabor			8500 ft.		27-VIII-1963	G.H.W. Schimper 1318 (BM-000922720) lectotype of C. schimperiana; (E-00286063) isotype of C. schimperiana	2
Carex spartea Wahlenb.	Ethiopia: Amhara region, Semién, Cerá				grassland	13-VII-1909	E. Chiovenda 979 (FT-000664) lectotype of Carex densenervosa; (K-000363532) isotype of C. densenervosa	2
Carex spartea Wahlenb.	Ethiopia: Amhara region, Dembiá, Bamboló				grassland	16-VII-1909	E. Chiovenda 1041 (FT-000665) syntype of Carex densenervosa Chiov.	1
Carex spartea Wahlenb.	South Africa: Cap. b. Spei						Thunberg (HAL-0103917) holotype of Carex indica	1
Carex spartea Wahlenb.	Democratic Republic of Congo: Kivu Nord District, 18 km to S of Sake	-1.6	28.9	2300 m.	Pyrethrum field	12-VIII-1954	H.U. Stauffer 68 (K, P)	2
Carex spartea Wahlenb.	Eswatini: Manzini District, Malkerns	-26.5407	31.1586	2500 ft.		15-II-1963	R.H. Compton 31775 (K)	1
Carex spartea Wahlenb.	Ethiopia: Addis Ababa region, Mt. Entoto, about 5 km. of Addis Ababa	9.083056	38.776111	2700 m.	open, rocky, grassy slopes, loamy soil	12-V-1966	W.J.J.O. de Wilde 10978 et B.E.E. de Wilde-Duyfjes (P)	1
Carex spartea Wahlenb.	Ethiopia: Oromia region, 35 km ESE of Shashamane,	7.04	38.88	2600 m.	grassland	26-VII-1970	De Wilde 6851 (K)	1
Carex spartea Wahlenb.	Ethiopia: Oromia region, Chilalo Awraja, 3 km S of Asella	7.9175	39.1081	2400 m.	grassy slope along small stream	8-X-1971	M. Thulin 1429 (K)	1
Carex spartea Wahlenb.	Ethiopia: Oromia region, Shewa Province, Menangesha Subs State Forest	8.967166	38.565361	2731 m.	dry area amonsgt rocks, but near small stream	28-X-2004	B. Gehrke BG-Af 193 et al. (Z)	1
Carex spartea Wahlenb.	Ethiopia: Oromia Province, Mt. Entoto, about 5 km. N Addis Ababa	9.1266	38.7703	2700 m.	open, rocky, grassy slopes on loamy soil	12-V-1966	W. Wilde 10978 (P)	1
Carex spartea Wahlenb.	Ethiopia: Southern Nations region, 22 km N of Soddu	7.0	37.7	1920 m.	rough grassland	6-IX-1975	M.G. Gilbert et al. 581 (K)	1
Carex spartea Wahlenb.	Kenya: Kericho County					II-1960	Sanders 331 (EA)	1
Carex spartea Wahlenb.	Kenya: Baringo County, 5 km NW of Timboroa	0.08	35.48	9000 ft.	forest edge	17-V-1959	Bogdan 4823 (K)	1
Carex spartea Wahlenb.	Kenya: Elgeyo Marakwet County, Kimwarer	0.443065	35.601667	2450 m.	riverbank in moist upland forest	20-VII-2017	N. Mwadime 1486 & W.R.Q. Kuke (EA)	1
Carex spartea Wahlenb.	Kenya: Kericho County, Londiani District, Tinderet Forest Reserve	-0.008333	35.25	2800 m.	grassland in Rubus sp. schrub	12-XII-1949	R.A.M. Geesteranus 5472 (K)	1
Carex spartea Wahlenb.	Kenya: Nyandarua County, S. Kinangop, Naivashs District	-0.3869	36.5317	9000 ft.	clumps of bush at forest edge		Polhill 436 (NU, EA)	2
Carex spartea Wahlenb.	Kenya: Trans Nzoia County, Saiwa Samp N.P.	1.198138	35.202372	1893 m.	shady forest understory	16-X-2005	B. Gehrke BG-Af 160 & A.M. Muasya (Z)	1
Carex spartea Wahlenb.	Lesotho: Leribe District, Tsehlanyane NP, upper trail to Black Pool	-28.911216	28.435261	1990 m.	shrubs clearing	15-I-2014	T. Villaverde 53TVH14, 54TVH14 et al. (UPOS)	2
Carex spartea Wahlenb.	Lesotho: Leribe District, Tsehlanyane NP, upper trail to Black Pool	-28.904436	28.445522	2138 m.	shrubs clearing	15-I-2014	T. Villaverde 65TVH14, 66TVH14, 67TVH14 et al. (UPOS)	3
Carex spartea Wahlenb.	Lesotho: Maseru District, between Semonkong and Roma	-29.760894	27.987286	2562 m.	wet meadows	18-I-2014	T. Villaverde 111TVH14 et al. (UPOS)	1
Carex spartea Wahlenb.	Lesotho: Maseru District, between Semonkong and Roma	-29.812363	28.032305	2248 m.	grassland	18-I-2014	T. Villaverde 131TVH14 et al. (UPOS)	1
Carex spartea Wahlenb.	Lesotho: Maseru District, Maletsunyane falls	-29.876305	28.050116	2307 m.	wet meadows	17-I-2014	T. Villaverde 104TVH14 et al. (UPOS)	1
Carex spartea Wahlenb.	Malawi: Chitipa District, Nyika Plateau	-10.4456	33.8213		edge of bog	5-I-1959	E.A. Robinson 3070 (P)	1
Carex spartea Wahlenb.	Malawi: Rumphi District, Nyika plateau	-10.7	33.8			5-I-1969	Robinson 3068 (P)	1
Carex spartea Wahlenb.	South Africa: Eastern Cape Province, 4 km S of Humansdorp on road to Cape St. Francis	-34.0711	24.8038	80 m.	grassy roadside in false fynbos	7-X-1987	G. Davidse 33615 (PRE)	1
Carex spartea Wahlenb.	South Africa: Eastern Cape Province, Adelaide District, Kroomieberg plateau	-32.708889	26.443889	1152 m.	dense afromontane grassland-shrubland on plateau	15-III-2011	V.R. Clark 129 (GRA)	1
Carex spartea Wahlenb.	South Africa: Eastern Cape Province, Amatole Mts., Menziesberg	-32.5828	26.8810	4700 ft.	grassy slopes, N facing	14-XII-1985	O.M. Hilliard & B.L. Burtt 18851 (NU)	1
Carex spartea Wahlenb.	South Africa: Eastern Cape Province, Coetzeesberg region, lower slopes of Sneeuberg , west of Aasvoelkrans, Buffelshoek 25 farm	-32.434910	25.200833	1200 m.	in Olea europea subsp. africana riparian woodland	24-XI-2007	V.R. Clark 49 & M. Rose (GRA)	1
Carex spartea Wahlenb.	South Africa: Eastern Cape Province, Fort Beaufort District, Katberg, Riet Vallei 55 farm	-32.498889	26.593333	1584 m.	montane grassland-shrubland	3-III-2011	V.R. Clark 87 & G. Keevey (GRA)	1
Carex spartea Wahlenb.	South Africa: Eastern Cape Province, Gaika's Kop	-32.5567	26.9423	1500 m.	marsh	27-I-1995	B. Sonnenberg 361, 366 (NU)	2
Carex spartea Wahlenb.	South Africa: Eastern Cape Province, Hogsback	-32.5527	27.0944	1700 m.	mountain grassland	24-XI-1994	B. Sonnenberg 317 (NU)	1
Carex spartea Wahlenb.	South Africa: Eastern Cape Province, Hogsback	-32.58	26.93				Clamon 16855 (K)	1
Carex spartea Wahlenb.	South Africa: Eastern Cape Province, Kleinrivier Wilderness	-33.5815	25.2529	386 m.	in shade	16-XII-2009	A.M. Muasya 5176 & C.H. Stirton (BOL, UPOS)	2
Carex spartea Wahlenb.	South Africa: Eastern Cape Province, Kleinrivier Wilderness	-33.6215	25.2545	887 m.	among rocks and in riverbed in shaded grooves	17-XII-2009	A.M. Muasya 5199 & C.H. Stirton (BOL, UPOS)	2
Carex spartea Wahlenb.	South Africa: Eastern Cape Province, Kleinrivier Wilderness	-33.6031	25.2541	641 m.		17-XII-2009	M. Muasya 5186MM & C.H. Stirton (BOL, UPOS)	2
Carex spartea Wahlenb.	South Africa: Eastern Cape Province, [Murberg] Range, Alexandria division			2000-3000 ft.			Drège s.n. (K-000363530)	1
Carex spartea Wahlenb.	South Africa: Eastern Cape Province, Pirie	-32.8	27.2				T.R. Sim 924 (PRE)	1
Carex spartea Wahlenb.	South Africa: Eastern Cape Province, Renosterberg area, near Middelburg	-31.63	24.94	2100 m.	mountain slope	7-IV-2006	V.R. Clark 133 et al., (GRA)	1
Carex spartea Wahlenb.	South Africa: Eastern Cape Province, road from Barkly East to Rhodes	-30.848888	27.890555	1920 m.	grassland	20-III-1996	J.E. Victor 1787 (PRE)	1
Carex spartea Wahlenb.	South Africa: Eastern Cape Province, Robertson Falls	-32.62	26.96	1500 m.	rocky river banks	28-XI-1994	B. Sonnenberg 386 (NU)	1
Carex spartea Wahlenb.	South Africa: Eastern Cape Province, Stutterheim	-32.51	27.4			XII-1913	F.A. Rogers 12831 (BOL)	1
Carex spartea Wahlenb.	South Africa: Eastern Cape, Grahamstown					18-IV-1908	F.A. Rogers 3195 (BOL)	1
Carex spartea Wahlenb.	South Africa: Eastern Cape, Grahamstown Nature Reserve				grassveld	31-X-1949	BOL171127	1
Carex spartea Wahlenb.	South Africa: Eastern Cape, Humansdorp	-34.02	23.95	750 ft.		X-1925	H.G. Fourcade 3135 (BOL)	1
Carex spartea Wahlenb.	South Africa: Eastern Cape, S of Witelsbos	-34.01	24.14	220 m.		4-XI-1996	J.J. Bruhl 1716 (NU)	1
Carex spartea Wahlenb.	South Africa: Eastern Cape, Uniondale	-33.6	23.1		rocky hill	7-XI-1944	E. Esterhuysen 10620 (BOL)	1
Carex spartea Wahlenb.	South Africa: Free State Province, 20 km S of Reddersburg	-29.83	26.20	1500 m.		20-II-1986	P.C. & L. Zietsman (PRE)	1
Carex spartea Wahlenb.	South Africa: Free State Province, Fauresmith	-29.7	25.3		in shade of Olea in south slope	11-II-1931	M.C.A. Henrici 2377 ex I.C. Verdoorn (PRE)	1
Carex spartea Wahlenb.	South Africa: Eastern Cape Province, Queensbury	-30.8278	27.6683	1900 m.	footslope seepage	III-2006	D. Kotze MDO622 (UPOS)	1
Carex spartea Wahlenb.	South Africa: Gauteng Province, Magaliesburg				north facing kloof	24-II-1958	A.V. Uvirem 468 (P)	1
Carex spartea Wahlenb.	South Africa: Gauteng Province, Suikerbosrand	-26.49	28.26	5800 ft.	grassland	31-XII-1971	G.J. Bredenkamp 653 (PRE)	1
Carex spartea Wahlenb.	South Africa: KwaZulu-Natal Province, Bushman's Nek	-29.851944	29.190805	1800 m.	grassland in slopes near stream	20-XI-2010	S. Martín-Bravo 154SMB10 & M. Luceño (UPOS)	1
Carex spartea Wahlenb.	South Africa: KwaZulu-Natal Province, Bushman's Nek	-29.847521	29.198544	1790 m.	grassland	18-XII-2008	M. Luceño 117ML08 et al. (UPOS)	1
Carex spartea Wahlenb.	South Africa: KwaZulu-Natal Province, Cathedral Peak area	-28.9448	29.1998	1333 m.	clay soils in open grassland	20-X-2006	B. Gehrke BG-Af 467 et al. (Z)	1
Carex spartea Wahlenb.	South Africa: KwaZulu-Natal Province, Cathedral Peak area	-28.940.444	29.198444	1496 m.	burnt, seasonally flooded meadow	11-XI-2012	E. Maguilla 69EMS12 et al. (UPOS)	1
Carex spartea Wahlenb.	South Africa: KwaZulu-Natal Province, Estcourt District, Jabamhlope				dryer parts of grassland grass cover not so dense	IX-1994	K.D. Gordon-Gray 5070 (NU)	1
Carex spartea Wahlenb.	South Africa: KwaZulu-Natal Province, Garden Castle Forest Reserve	-29.750305	29.211972	1803 m.	wet meadow near a stream	16-XI-2012	E. Maguilla 84EMS12 et al. (UPOS)	1
Carex spartea Wahlenb.	South Africa: KwaZulu-Natal Province, Garden Castle Forest Reserve, path to Rhino Peak	-29.732	29.183111	2000 m.	grassland in slopes	19-XI-2010	S. Martín-Bravo 146SMB10 et al. (UPOS)	1
Carex spartea Wahlenb.	South Africa: KwaZulu-Natal Province, Hlabisa District, False Bay Park	-28.03	32.30			27-III-1975	R.H. Taylor 343 (NU)	1
Carex spartea Wahlenb.	South Africa: KwaZulu-Natal Province, Howick, Merrivale Shooting Range	-29.4914	30.2147	1035 m.	wet grassland	20-XI-1991	D. Kotze 151 (NU)	1
Carex spartea Wahlenb.	South Africa: KwaZulu-Natal Province, Izotsha Creek, between Margate and Port Shepstone	-30.7825	30.4218	6 m.	grassland	10-I-2008	A.M. Muasya 3644MM & C.H. Stirton (BOL, UPOS)	2
Carex spartea Wahlenb.	South Africa: KwaZulu-Natal Province, Kokstad			5000 ft.		XII-1883	W. Tyson 1834 (BOL)	1
Carex spartea Wahlenb.	South Africa: KwaZulu-Natal Province, Lotheni area	-29.59	29.88	5350 ft.	damp grounds	26-XII-1984	O.M. Hilliard & B.L. Burtt 18097 (NU)	1
Carex spartea Wahlenb.	South Africa: KwaZulu-Natal Province, Mpendhle District, Loteni Nature Reserve			5000 ft.	among grass	27-XII-1982	O.M. Hilliard & B.L. Burtt 16133 (NU)	1
Carex spartea Wahlenb.	South Africa: KwaZulu-Natal Province, Louwsburg District, Ithala Nature Reserve, Potwe Mountain	-27.5616	31.3069	3200-3600 ft.	rocky hillside	13-XII-1975	Brown & Shapiro 132 (K)	1
Carex spartea Wahlenb.	South Africa: KwaZulu-Natal Province, Mlambonja Wilderness area, path to Cathedral Peak	-28.936527	29.184305	1785 m.	grassland near a stream	15-XI-2011	S. Martín-Bravo 130SMB11 & M. Luceño (UPOS)	1
Carex spartea Wahlenb.	South Africa: KwaZulu-Natal Province, Mtunzini	-28.96	31.74	65 m.		1-VI-1919	Mogg 4512 (PRE)	1
Carex spartea Wahlenb.	South Africa: KwaZulu-Natal Province, New Hanover District, near Georgenau Mission	-29.4	30.5		flat stony outcrops (schistic sandstone) in grass	26-XII-1955	E. Bayer s.n. (NU)	1
Carex spartea Wahlenb.	South Africa: KwaZulu-Natal Province, Ntamahlophe	-29.113611	29.627472	1549 m.	grassland in Helichrysum spp. scrub clearing	10-X-2012	E. Maguilla 46EMS12 et al. (UPOS)	1
Carex spartea Wahlenb.	South Africa: KwaZulu-Natal Province, Oliviershoek Pass, above Little Switzerland	-28.5497	29.0777	5.800 ft.	base of shady and beak in grass	5-II-1982	O.M. Hilliard & B.L. Burtt 15429 (NU)	1
Carex spartea Wahlenb.	South Africa: KwaZulu-Natal Province, Pietermaritzburg, Table Mountain	-30.3389	30.4684	3000 ft.	grassland	29-X-1949	Killick 696 (NU)	1
Carex spartea Wahlenb.	South Africa: KwaZulu-Natal Province, Port Eward	-31.04	30.22				W.G. Rump (NU)	1
Carex spartea Wahlenb.	South Africa: KwaZulu-Natal Province, Port Shepstone	-30.77	30.43	45 m.	disturbed forest margin	11-IV-1972	C.J. Ward 7641 (K)	1
Carex spartea Wahlenb.	South Africa: KwaZulu-Natal Province, Pevensey road from Bulwer	-29.8428	29.6937	1640 m.	grassland	08-XI-2009	A.M. Muasya 4913 & C.H. Stirton (BOL, UPOS)	2
Carex spartea Wahlenb.	South Africa: KwaZulu-Natal Province, Richmond District	-29.91	30.09			18-II-1967	N. Jacobsen 8 (NU)	1
Carex spartea Wahlenb.	South Africa: KwaZulu-Natal Province, Umcinto District, Umgayi	-30.3389	30.4684	1700 ft.	grassland	20-III-1966	C.J. Ward 5480 (NU)	1
Carex spartea Wahlenb.	South Africa: KwaZulu-Natal Province, Umzinto, Vernon Crookes Natural Reserve	-30.3264	30.6694	174 m.	semi-shade of forest margin	IX-1988	T. Edwards 271b (NU)	1
Carex spartea Wahlenb.	South Africa: KwaZulu-Natal Province, Uthukela, Cathedral Peak hotel	-28.944681	29.199841	1455 m.	grassland with Pteridium aquilinum and Imperata cylindrica	13-XI-2011	S. Martín-Bravo 124SMB11 & M. Luceño (UPOS)	1
Carex spartea Wahlenb.	South Africa: KwaZulu-Natal Province, Vernon Crookes Nature Reserve	-30.27	30.61	400-500 m.	burn out vlei	1-X-1989	J. Browning 227 (NU)	1
Carex spartea Wahlenb.	South Africa: KwaZulu-Natal Province, Vryheid Hill Nature Reserve	-27.7538	30.7921	1270 m.	grassland in shade	20-I-2008	M. Muasya 3788MM & C.H. Stirton (BOL, UPOS)	2
Carex spartea Wahlenb.	South Africa: KwaZulu-Natal Province, Wahroonga farm, Near Boston	-29.61	30.13	1450 m.	grassland	8-XI-2009	A.M. Muasya 4900a & C.H. Stirton (BOL, UPOS)	2
Carex spartea Wahlenb.	South Africa: Limpopo Province, Polokwane, Te Downs Farm	-24.15	30.18			XII-1917	C.E. Moss 300 & F.A. Rogers (BOL)	1
Carex spartea Wahlenb.	South Africa: Mpumalanga Province, Songimvelo Game Reserve	-25.95	30.99			7-XII-1992	C. Reid 1820 (PRE)	1
Carex spartea Wahlenb.	South Africa: Western Cape Province, George, Nuakamma river			1230 ft.		27-X-1943	H.G. Fourcade 6187 (BOL)	1
Carex spartea Wahlenb.	South Africa: Western Cape Province, Mossel Bay	-34.100439	21.906314	325 m.	open grassland with Bobartia macrospatha	14-X-2017	J.I. Márquez-Corro 173JMC17, 177JMC17, 178JMC17, 183JMC17, 184JMC17, 185JMC17 et al. (UPOS)	6
Carex spartea Wahlenb.	Tanzania: Arusha region, Meru crater	-3.3	36.7	8500 ft.	heath	25-V-1969	D. Vesey-FitzGerald 6270 (EA)	1
Carex spartea Wahlenb.	Tanzania: Iringa region, Mufindi	-8.50	35.21	1800 m.	grassland with heavy loamy soils	28-III-2006	S. Bidgood 5153 et al. (P)	1
Carex spartea Wahlenb.	Tanzania: Mbeya region, Mbeya mountain	-8.845	33.361389		in sheltered hollow in mountain grassland	11-I-1963	D. Kapper 1696 (EA)	1
Carex spartea Wahlenb.	Tanzania: Ruvuma region, Matengo Highlands	-11.1375	34.8875		at edge of upland rain forest	3-III-1956	E. Milne-Redhead 8966 & P. Taylor (EA)	1
Carex spartea Wahlenb.	Tanzania: Tanga region, Usambara Mountains, Dumbuli, D.O.'s rest house	-4.6	38.4	1900 m.	grassland at margins of cultivation	11-V-1955	R.B. Drummond 2506 & J.H. Hamsley (EA)	1
Carex spartea Wahlenb.	Uganda: Northern region, Karamoja, SE of Sogolomon, Mt. Moroto	2.53	34.77	2600 m.	grassland in edge of forest	11-VI-1970	K. Lye 5615 et al. (K)	1
Carex spartea Wahlenb.	Uganda: Northern region, Mt. Moroto, near F.D. Trials	2.52	34.76	2600 m.		11-VI-1970	A.B. Katende 403 (K)	1
Carex spartea Wahlenb.	Uganda: Northern region			7500 ft.	forest floor	1960	Gheilson 1153a (EA)	1
Carex spartea Wahlenb.	Uganda: Western region, Rubanda, near Kabale Kigesi	-1.3	30.0	6000 ft.	open, disturbed grassland	29-IV-1967	R.W. Haines 4204 (P)	1
Carex spartea Wahlenb.	Zimbabwe: Manicaland Province, Inyanga NP, NP Experimental Station	-18.2	32.7		open burnt grassland	5-I-1975	J.E. Burrows 682 (P)	1
Carex spartea Wahlenb.	Zimbawe: Manicaland Province, Chimanimani NP	-19.8042	32.8762	1500 m.	amongst dense tall vegetation	29-IV-1993	J. Browning 610 (NU)	1
Carex spartea Wahlenb.	Zimbawe: Manicaland Province, Mt. Selinda	-20.4492	32.6970		burnt field	XII-1937	A.A. Obermeyer 2279 (BOL, PRE)	2
Carex spartea Wahlenb.	Zimbawe: Manicaland Province, Vumba Mts., below Leopard Rock Hotel	-19.1406	32.7863	1350 m.	shade on side of track	21-IV-93	J. Browning 575 (NU)	1
