# Supplementary material for: An integrative monograph of Carex section Schoenoxiphium (Cyperaceae)
Source: PeerJ. 2021 May 17;9:e11336. doi: 10.7717/peerj.11336 (PMC8136282; doi:10.7717/peerj.11336)
Supplement: Supplemental Information 2 — Materials newly incorporated in molecular analyses with indication of their current taxa determination, authors of species, locality of collection, voucher number, collector number, collection date, herbarium where they are deposited (codes following Thiers, 2020), and NCBI codes for Sanger sequences and RAD-seq raw reads. [file peerj-09-11336-s002.xlsx]

## Sheet: TableS2
Taxa-Current_determination	Authors	Country	State_Province_Region_territory	Voucher	Collector_number	Collection_date	ETS	ITS	matK	rps16	SRA number
Carex acocksii	C. Archer	South Africa	Northern Cape province, Calvinia, Hantam Mts.	UPOS 12699	110JMC17	11-X-2017	MW574411	MW584588	MW584598	MW584608
Carex acocksii	C. Archer	South Africa	Northern Cape province, Calvinia, Hantam Mts.	UPOS 12701	121JMC17	11-X-2017	MW574412	MW584589	MW584599	MW584609
Carex andina	Phil.	Chile	Region Metropolitana.	UPOS1837	24ML06	10-I-2006					SAMN10872966
Carex badilloi	Luceño & Márquez-Corro	South Africa	Kwazulu-Natal, Drakensberg mountains.	UPOS 8501	145SMB10	19-XI-2010					SAMN10872967
Carex badilloi	Luceño & Márquez-Corro	South Africa	Kwazulu-Natal, Garden Castle Forest Reserve.	UPOS 3624	92ML08	16-XII-2008					SAMN10872968
Carex basutorum	(Turrill) Luceño & Martín-Bravo	South Africa	Free state Province. Golden Gate Highlands National Park.	UPOS 5247	141TVH14	20-I-2014					SAMN10872969
Carex basutorum	(Turrill) Luceño & Martín-Bravo	South Africa	Free state province.	PRE 812904	Gertenbach and Groenewald, 9047			KY322260	KY322376	KY322317
Carex bolusii	C. B. Clarke	South Africa	KwaZulu Natal province, Garden Castel Forest Reserve.	UPOS 3591	101ML08	16-XII-2008	KY322207
Carex bolusii	C. B. Clarke	South Africa	KwaZulu Natal province, Garden Castel Forest Reserve.	UPOS 14111	101ML08bis	16-XII-2008	KY322209
Carex bolusii	C. B. Clarke	South Africa	KwaZulu Natal province, Garden Castel Forest Reserve.	UPOS 3594	107ML08	16-XII-2008	KY322204
Carex bolusii	C. B. Clarke	South Africa	KwaZulu-Natal, Drakensberg, 10 km from Phuthaditjhaba, Witsiesshoek mountain resort.	UPOS 8504	125SMB10	16-XI-2010	KY322208
Carex bolusii	C. B. Clarke	South Africa	KwaZulu-Natal province, Witsiesshoek mountain resort.	UPOS 8525	126SMB10	16-XI-2010	KY322203
Carex bolusii	C. B. Clarke	South Africa	Free state Province.Golden Gate Highlands National Park.	UPOS 5254	134TVH14	20-I-2014					SAMN10872991
Carex bolusii	C. B. Clarke	South Africa	Free state Province.Golden Gate Highlands National Park.	UPOS 14051	136TVH14	20-I-2014					SAMN10872999
Carex bolusii	C. B. Clarke	South Africa	Free state Province.Golden Gate Highlands National Park.	UPOS 5255	138TVH14 (2/3)	20-I-2014					SAMN10872989
Carex bolusii	C. B. Clarke	South Africa	KwaZulu-Natal, Drakensberg, 40 km. from Underberg, Garden Castle Natural Reserve.	UPOS 8538	141SMB10	19-XI-2010	KY322210				SAMN10872997
Carex bolusii	C. B. Clarke	South Africa	Free State province, Golden Gate Highlands National Park.	UPOS 3601	143SMB08	13-XI-2008	KY322202
Carex bolusii	C. B. Clarke	Lesotho	Thaba Tseka district, Sani Pass.	UPOS 3607	163SMB08	17-XII-2008					SAMN10872995
Carex bolusii	C. B. Clarke	Lesotho	Leribe District, Pitseng.	UPOS 8506	18TVH14	14-I-2014					SAMN10872994
Carex bolusii	C. B. Clarke	Lesotho	Leribe District, Pitseng.	UPOS 8524	35TVH14	14-I-2014					SAMN10872996
Carex bolusii	C. B. Clarke	Lesotho	Maseru district.	UPOS 8515	69TVH14	15-I-2014					SAMN10872992
Carex bolusii	C. B. Clarke	South Africa	Kwazulu-Natal, Drakensberg Mountains, Bushman´s Nek.	UPOS 8502	70EMS12bis	15-XI-2012					SAMN10872998
Carex bolusii	C. B. Clarke	South Africa	KwaZulu-Natal province, Garden Castle Forest Reserve.	UPOS 8503	77EMS12	16-XI-2012	KY322206	KY322247	KY322359
Carex bolusii	C. B. Clarke	Lesotho	Maseru district, Semonkong.	UPOS 8547	83TVH14	16-I-2014					SAMN10873000
Carex bolusii	C. B. Clarke	Lesotho	Maseru district, Semonkong.	UPOS 8516	84TVH14	16-I-2014					SAMN10872993
Carex bolusii	C. B. Clarke	Lesotho	Maseru district, Semonkong.	UPOS 8517	89TVH14	16-I-2014					SAMN10872990
Carex bolusii	C. B. Clarke	South Africa	KwaZulu Natal province, Garden Castel National Park.	UPOS 3626	94ML08	16-XII-2008	KY322205			KY322283
Carex burkei	(C.B. Clarke) Luceño & Martín-Bravo	South Africa	Maseru District. Semonkong..	UPOS 8555	103TVH14	17-I-2014					SAMN10872970
Carex burkei	(C.B. Clarke) Luceño & Martín-Bravo	South Africa	Kwazulu-Natal, Cathedral Peak.	UPOS 8557	127SMB10	17-XI-2010					SAMN10872971
Carex burkei	(C.B. Clarke) Luceño & Martín-Bravo	South Africa	Free state Province, Golden Gate Highlands National Park.	UPOS 5252	135TVH14	20-I-2014					SAMN10872972
Carex burkei	(C.B. Clarke) Luceño & Martín-Bravo	South Africa	Free State province, Golden Gate National Highlands Park.	UPOS 3602	144SMB08	13-XII-2008				KY322297
Carex burkei	(C.B. Clarke) Luceño & Martín-Bravo	South Africa	Free State province, Golden Gate National Highlands Park, Glen Reenen.	UPOS 8556	41ML10	15-XI-2010	KY322172		KY322365	KY322296
Carex burkei	(C.B. Clarke) Luceño & Martín-Bravo	South Africa	KwaZulu-Natal province, Maloti-Drakensberg Park World Heritage Site, Monk´s Cowl.	UPOS 3621	79ML08	14-XII-2008				KY322294
Carex burkei	(C.B. Clarke) Luceño & Martín-Bravo	South Africa	Eastern Cape Province, Middelburg, Gordonville.	PRE	Acocks16569	13-XI-1952		KY322269	KY322387
Carex burkei	(C.B. Clarke) Luceño & Martín-Bravo	South Africa	KwaZulu-Natal Province, Golden Gate National Park.	Z	BG_Af480	12-X-2006	KY322171
Carex burkei	(C.B. Clarke) Luceño & Martín-Bravo	South Africa	Kwuazulu-Natal.	Z-39367	BG-AF474		GU176174			KY322352
Carex burkei	(C.B. Clarke) Luceño & Martín-Bravo	South Africa	Eastern Cape province, Sneeuberg, Kruygers Baaken.	UPOS 14027	Clark99	15-II-2006	KY322170			KY322334
Carex capensis	Thunb.	South Africa	Western Cape province, Mossel Bay.	UPOS 13982	179JMC17	14-X-2017	MW574418	MW584595	MW584605	MW584615	SAMN17719183
Carex capensis notseen		South Africa	14E5TVH13	BOL 45532	Estehmysen 33907		KY322166	KY322253	KY322367	KY322300
Carex capensis x sciocapensis		South Africa	4E7EMS13	BOL 45527	Estehmysen 33972			KY322265
Carex distachya	Desf.	Spain	Avila, Piedralaves.	UPOS 5410	114PJM12	16-VI-2012					SAMN10872974
Carex distincta	(Kukkonen) Luceño & Martín-Bravo	Lesotho	Leribe district, Hlotse.	UPOS 14071	8TVH14	13-I-2014					SAMN17719185 /SAMN10872976
Carex distincta	(Kukkonen) Luceño & Martín-Bravo	Lesotho	Semonkong.	UPOS 14073	81TVH14(4/4)	16-I-2014					SAMN10872975
Carex distincta	(Kukkonen) Luceño & Martín-Bravo	Lesotho	Maseru district.	UPOS14084	99TVH14	16-I-2014					SAMN10872977
Carex distincta	(Kukkonen) Luceño & Martín-Bravo	South Africa	Kwazulu-Natal province, Ukhahlamba Drakensberg Park, Bushman's Nek, near Shelabathebe.	UPOS 4391	BG570	19-XII-2008	KY322181
Carex distincta	(Kukkonen) Luceño & Martín-Bravo	South Africa	Kwazulu-Natal province, Ukhahlamba Drakensberg Park, Cathedral Peak, path to Cathedral Peak.	UPOS 4390	BG574	20-XII-2008	KY322188
Carex dregeana	Kunth	Madagascar	Fianarantsoa Province, Andringitra NP, Diavolana Trail.	BOL	129_2010	18-IV-2010
Carex dregeana	Kunth	South Africa	Kwazulu-Natal.	UPOS 8533	129SMB11	15-XI-2011					SAMN10873013
Carex dregeana	Kunth	South Africa	Kwazulu-Natal, Cordillera Drakensberg, 40km from Underberg, Bushman´s Nek natural reserve, Caravan´s Park.	UPOS	153SMB10	20-XI-2010	KY322220			KY322302
Carex dregeana	Kunth	South Africa	Kwazulu-Natal.	UPOS 8534	45EMS12	10-XI-2012					SAMN10873012
Carex dregeana	Kunth	South Africa	Free State province, Golden Gate Highlands National Park.	UPOS 3617	66ML08	12-XII-2008	KY322222	KY322261		KY322320	SAMN10873011
Carex dregeana	Kunth	South Africa	Kwazulu-Natal, Drakensberg Mountains, Bushman´s Nek.	silica	70EMS12c	15-XI-2012	KY322224	KY322272	KY322347	KY322391
Carex dregeana	Kunth	South Africa	Kwazulu-Natal, Drakensberg Mountains, Bushman´s Nek.	silica	70EMS12d	15-XI-2012	KY322225	KY322275	KY322395	KY322351
Carex dregeana	Kunth	Madagascar	Fianarantsoa Province, Andringitra NP.	Z	BG_AF275	13-III-2006	KY322218
Carex dregeana	Kunth	South Africa	Eastern Cape Province, between Grahamstown and Port Alfred, towards East London, Shaw Park near Fish River Lighthouse.	Z	BG_Af432	09-X-2006	KY322223
Carex dregeana	Kunth	South Africa	KwaZulu-Natal province, Cathedral Peak.	UPOS 14024	MM3720	15-I-2008	KY322227			KY322314
Carex dregeana	Kunth	South Africa	KwaZulu-Natal province, 1 km from Utrecht to Wakkerstroom near top of Pass.	UPOS 14021	MM3775	20-I-2008				KY322335
Carex dregeana	Kunth	South Africa	KwaZulu-Natal province, Vryheid Nature Reserve.	UPOS 14025	MM3784	20-I-2008	KY322219			KY322306
Carex dregeana	Kunth	South Africa	KwaZulu-Natal Province, Wahroonga farm, Near Boston.	BOL	MM4900b	8-XI-2009	KY322216
Carex dregeana	Kunth	South Africa	KwaZulu-Natal province, Bulwer-Underberg road on turnoff to Pevensey.	UPOS 14022	MM4909	08-XI-2009	KY322221
Carex dregeana	Kunth	South Africa	KwaZulu-Natal province, 103 km from Boston.	UPOS 13996	MM4924	09-XI-2009	KY322243
Carex esenbeckiana	Boeckeler	Kenya		UPOS	418PMM07	VII-2007
Carex esenbeckiana	Boeckeler	South Africa	Eastern Cape province, Port Elizabeth, Tsitsikamma NP.	UPOS 3251	463PV00	4-XI-2000	KY322232			KY322349
Carex esenbeckiana	Boeckeler	South Africa	KwaZulu-Natal province, Ntabamhlophe.	UPOS 8526	51EMS12	10-XI-2012	KY322178	KY322263	KY322379	KY322325
Carex esenbeckiana	Boeckeler	Kenya	Laikipia County.	UPOS 3279	70UPO-K	25-VII-2007					SAMN10873015
Carex esenbeckiana	Boeckeler	South Africa	Kwazulu-Natal province. Monk´s Cowl Natural Reserve.	UPOS 3622	81ML08	14-XII-2008					SAMN10873014
Carex esenbeckiana	Boeckeler	South Africa	Mpumalanga.	PRE 841896	Burrows 8691		KY322231	KY322258
Carex esenbeckiana	Boeckeler	South Africa	Eastern Cape Province, Port St. Johns.	K	Killlick2029	4-XI-1953		KY322276
Carex esenbeckiana	Boeckeler	South Africa	Eastern Cape province, Wilderness Area, Kaaiman´s River.	UPOS 14002	MM3864	25-I-2008	KY322233		KY322377	KY322319
Carex gordon-grayae	Luceño, Márquez-Corro & Sánchez-Villegas	South Africa	Eastern Cape, Hagga-Hagga district.	UN	B. Sonnenberg 446	7-XII-1995	MW574413	MW584590	MW584600	MW584610
Carex killickii	Nelmes	Lesotho	Maseru district, Semonkong.	UPOS 8819	88TVH14	16-I-2014					SAMN10872982
Carex Killickii	Nelmes	South Africa	Free State province, Witsieshoek mountain, 10 km from Phuthaditjaba.	UPOS 13991	124SMB10	16-XI-2010	KY322184
Carex killickii	Nelmes	Lesotho	Leribe district, Pitseng.	UPOS 8809	17TVH14	14-I-2014					SAMN10872981
Carex Killickii	Nelmes	South Africa	KwaZulu-Natal province, Mlambonja Wilderness area, Cathedral Peak ascent, between Sherman´s Cave and Orange Peel Gap.	UPOS 3610	184SMB08	20-XII-2008	KY322176
Carex killickii	Nelmes	Lesotho	Leribe District.	UPOS	56TVH14	2014					SAMN10872978
Carex Killickii	Nelmes	South Africa	Free State province, Golden Gate Highlands National Park.	UPOS 3619	68ML08	12-XII-2008	KY322175
Carex Killickii	Nelmes	South Africa	KwaZulu-Natal province, Bushman's Nek area, Caravan Park.	UPOS 14043	72EMS12	15-XI-2012	KY322187		KY322385	KY322340
Carex killickii	Nelmes	Lesotho	Leribe District.	UPOS 8815	74TVH14	15-I-2014					SAMN10872979
Carex Killickii	Nelmes	South Africa	KwaZulu-Natal province, Garden Castle Forest Reserve.	UPOS 14036	80EMS12	16-XI-2012	KY322183	KY322266	KY322383	KY322332
Carex Killickii	Nelmes	South Africa	KwaZulu-Natal province, Garden Castle Forest Reserve.	UPOS 14039	82EMS12	16-XI-2012	KY322182	KY322255	KY322369	KY322303
Carex killickii	Nelmes	Lesotho	Maseru district, Semonkong.	UPOS 8816	82TVH14 (1/2)	16-I-2014					SAMN10872980
Carex Killickii	Nelmes	South Africa	KwaZulu Natal province, Garden Castel Forest Reserve.	UPOS 3625	93ML08	16-XII-2008	KY322186
Carex killickii	Nelmes	South Africa	Cape Region.	UPOS 14035	Clark 340	26-XI-2006	KY322180			KY322309
Carex Killickii	Nelmes	South Africa	Eastern Cape province, Tennahead, Naudesnek.	UPOS 14047	MDO122	I-2006	KY322179
Carex Killickii	Nelmes	South Africa	Free State province, Drakensberg scarpment, Dumbe Cotages.	UPOS 14072	MM3756	19-I-2008	KY322185			KY322291
Carex kukkoneniana	Luceño & Martín-Bravo	Malawi	Rumphi District, Nyika National Park, Chelinda river Road.	Z	BG_Af321	07-II-2005	KY322220		KY322362
Carex kukkoneniana	Luceño & Martín-Bravo	South Africa		Z-39363	BG_Af338		EU288650				SAMN10873010
Carex kukkoneniana	Luceño & Martín-Bravo	South Africa	Eastern Cape province.	UPOS 14045	McKenzie 129	4-III-2006					SAMN10872984
Carex lancea	(Thunb.) Baill.	South Africa	Western Cape province, Kannaland, Towerkop Nature Reserve, Seweweekspoortrivier.	UPOS 9969	139JMC17	12-X-2017	MW574420	MW584597	MW584607	MW584617
Carex lancea	(Thunb.) Baill.	South Africa	Western Cape province, Wilderness, Brown Hooded Kingfisher track.	UPOS 9973	204JMC17	14-X-2017	MW574419	MW584596	MW584606	MW584616
Carex lancea	(Thunb.) Baill.	South Africa	Western Cape province, Langeberg, Tradouw Pass.	UPOS 14019	MM2934	18-VIII-2006	KY322161			KY322307	SAMN10872985
Carex lancea	(Thunb.) Baill.	South Africa	Western Cape, Jonkershoek Nature Reserve.	UPOS 14020	MM2962	22-VIII-2006	KY322158		KY322389	KY322343
Carex lancea	(Thunb.) Baill.	South Africa	Western Cape province, Cape Town, Table Mountain, Skeleton Gorge.	UPOS 14018	MM4544	12-IX-2009	KY322160		KY322393
Carex lancea	(Thunb.) Baill.	South Africa	Western Cape Province, Table Mountain, Orangekloof.	BOL	Salter9631	13-IX-1955	KY322159	KY322273	KY322392	KY322348
Carex ludwigii	(Hochst.) Luceño & Martín-Bravo	South Africa	KwaZulu-Natal province, Garden Castel Forest Reserve.	UPOS 3593	106ML08	16-XII-2008	KY322194			KY322287
Carex ludwigii	(Hochst.) Luceño & Martín-Bravo	Lesotho	Maseru district, Semonkong.	UPOS 8542	108TVH14	17-I-2014					SAMN10872986
Carex ludwigii	(Hochst.) Luceño & Martín-Bravo	South Africa	KwaZulu-Natal province, Drakensberg, Garden Castle Forest Reserve.	UPOS 14085	147SMB10	19-XI-2010				KY322289
Carex ludwigii	(Hochst.) Luceño & Martín-Bravo	South Africa	Kwazulu-Natal, Drakensberg mountains, Sani pass, no man´s land.	UPOS	159SMB10	21-XI-2010	KY322196			KY322288
Carex ludwigii	(Hochst.) Luceño & Martín-Bravo	South Africa	KwaZulu-Natal province, Drakenstberg, road to Sani Pass.	UPOS 14086	162SMB10	21-XI-2010				KY322282
Carex ludwigii	(Hochst.) Luceño & Martín-Bravo	South Africa	KwaZulu-Natal province, Catedral Peak, Orange Peel Gap.	UPOS 14087	64EMS12	11-XI-2012	KY322192	KY322246	KY322357	KY322280
Carex ludwigii	(Hochst.) Luceño & Martín-Bravo	South Africa	Free State province, Golden Gate Highlands National Park.	UPOS 3616	65ML08	12-XII-2008	KY322195
Carex ludwigii	(Hochst.) Luceño & Martín-Bravo	South Africa	KwaZulu-Natal province, Garden Castle Forest Reserve.	UPOS 14088	78EMS12a	16-XI-2012	KY322193		KY322358	KY322281	SAMN10872987
Carex ludwigii	(Hochst.) Luceño & Martín-Bravo	South Africa	KwaZulu-Natal province, Ukhahlamba Drakensberg Park, Bushman's Nek, path to Tarn Cave.	UPOS 4393	BG572	19-XII-2008	KY322197			KY322290
Carex multispiculata	Luceño & Martín-Bravo	South Africa	KwaZulu-Natal province, Drakensberg, Mlambonja Wilderness area, ascent path to Cathedral Peak.	UPOS 8531	129SMB10	17-XI-2010		KY322257	KY322371	KY322305
Carex multispiculata	Luceño & Martín-Bravo	South Africa	KwaZulu-Natal province, Cathedral Peak Natural Reserve, path from Didima Camp Lodge to Cathedral Peak.	UPOS 8527	53EMS12	11-XI-2012		KY322254	KY322368	KY322301
Carex multispiculata	Luceño & Martín-Bravo	South Africa	KwaZulu-Natal province, Cathedral Peak Natural Reserve, path from Didima Camp Lodge to Cathedral Peak, Orange Peel Gap base.	UPOS 8528	56EMS12	11-XI-2012		KY322250	KY322363	KY322250
Carex multispiculata	Luceño & Martín-Bravo	South Africa	KwaZulu-Natal province, Cathedral Peak, Orange Peel Gap base.	UPOS 8529	66EMS12	11-XI-2012	KY322163	KY322274	KY322350	KY322394	SAMN10872988
Carex multispiculata	Luceño & Martín-Bravo	South Africa	KwaZulu-Natal province, Cathedral Peak, Orange Peel Gap base.	UPOS 8530	67EMS12	11-XI-2012		KY322271	KY322390	KY322346
Carex multispiculata	Luceño & Martín-Bravo	South Africa	KwaZulu-Natal province, Cathedral Peak, Orange Peel Gap base.	UPOS 5060	68EMS12	11-XI-2012		KY322262	KY322378	KY322321
Carex multispiculata	Luceño & Martín-Bravo	South Africa	KwaZulu-Natal Province, Cathedral Peak Area, at the fishpond.	Z	BG_Af473	20-X-2006	KY322162			KY322336;
Carex perdensa	(Kukkonen) Luceño & Martín-Bravo	South Africa	Kwazulu-Natal, Drakensberg Mountains, Bushman´s Nek.	UPOS 14110	73EMS12	15-XI-2012	KY322215	KY322259	KY322375	KY322316
Carex perdensa	(Kukkonen) Luceño & Martín-Bravo	South Africa	KwaZulu-Natal province, Bushman's Nek.	UPOS 14090	74EMS12	15-XI-2012					SAMN10873001
Carex perdensa	(Kukkonen) Luceño & Martín-Bravo	South Africa	Kwazulu-Natal, Drakensberg Mountains, Bushman´s Nek.	silica	74EMS12b	15-XI-2012	KY322213	KY322267	KY322384	KY322333
Carex perdensa	(Kukkonen) Luceño & Martín-Bravo	South Africa	KwaZulu-Natal province, Drakensberg range, Garden Castle Forest Reserve.	UPOS 3629	98ML08	16-XII-2008	KY322211		KY322374	KY322313
Carex perdensa	(Kukkonen) Luceño & Martín-Bravo	South Africa	KwaZulu-Natal province, Cathedral Peak.	UPOS 14001	MM3719	15-I-2008	KY322212			KY322328
Carex pseudorufa	Luceño & Martín-Bravo	South Africa	KwaZulu-Natal province, Cathedral Peak area.	UPOS 14057	59EMS12	11-XI-2012	KY322189		KY322354	KY322277	SAMN10873002
Carex pseudorufa	Luceño & Martín-Bravo	South Africa	KwaZulu-Natal province, path to Rhino Peak from Hermit´s wood.	UPOS 14056	85EMS12	16-XI-2012	KY322190	KY322245	KY322356	KY322279
Carex pseudorufa	Luceño & Martín-Bravo	South Africa	KwaZulu-Natal province, Ukhahlamba Drakensberg Park, Garden Castle Forest reserve, path to Rhino Peak, near first river crossing below Pillar Cave.	UPOS 4396	BG567	16-XII-2008	KY322191		KY322355	KY322278
Carex schweickerdtii	(Merxm. & Podlech) Luceño & Martín-Bravo	South Africa	Kwazulu-Natal, path to Cathedral Peak.	UPOS 3614	189SMB08	20-XII-2008	KY322155		KY322372	KY322310	SAMN10873009
Carex schweickerdtii	(Merxm. & Podlech) Luceño & Martín-Bravo	South Africa	KwaZulu-Natal Province, Bushman's Nek area, ca. 3 Km after main gate entrance along the river towards the east.	Z	BG_Af454	15-X-2006	KY322157		KY322396
Carex schweickerdtii	(Merxm. & Podlech) Luceño & Martín-Bravo	South Africa	Kwazulu-Natal, Ukhahlamba Drakensberg Park, Garden Castle Forest Reserve, path to Rhino Peak.	UPOS 4394	BG568	16-XII-2008	KY322154		KY322373	KY322311
Carex schweickerdtii	(Merxm. & Podlech) Luceño & Martín-Bravo	South Africa	KwaZulu-Natal province, Lotheni.	UPOS 14003	Sieben 444	II-2006	KY322156		KY322381	KY322327
Carex sciocapensis	Luceño, Márquez-Corro & Sánchez-Villegas	South Africa	Western Cape province, Kannaland, Towerkop Nature Reserve, Seweweekspoortrivier.	UPOS 14041	135JMC17	12-X-2017	MW574416	MW584593	MW584603	MW584613
Carex sciocapensis	Luceño, Márquez-Corro & Sánchez-Villegas	South Africa	Western Cape province, Kannaland, Towerkop Nature Reserve, Seweweekspoortrivier.	UPOS 13967	143JMC17	12-X-2017	MW574417	MW584594	MW584604	MW584614
Carex sciocapensis	Luceño, Márquez-Corro & Sánchez-Villegas	South Africa	Western Cape province, Wilderness, Brown Hooded Kingfisher track.	UPOS 14042	193JMC17	14-X-2017	MW574415	MW584592	MW584602	MW584612	SAMN17719184
Carex sciocapensis	Luceño, Márquez-Corro & Sánchez-Villegas	South Africa	Cultivated in 2008 at the University of Capetown.	UPOS 14026	BG535		KY322164				SAMN10872973
Carex sciocapensis	Luceño, Márquez-Corro & Sánchez-Villegas	South Africa	Western Cape province, Calitzdorp, Matjiesgoedvallei, Wiswedel's farm.	UPOS 13989	MM3034A	23-IX-2006	KY322167			KY322315
Carex sciocapensis	Luceño, Márquez-Corro & Sánchez-Villegas	South Africa	Western Cape province, Calitzdorp, Matjiesgoedvallei, Wiswedel's farm.	UPOS 13988	MM3034B	23-IX-2006	KY322169			KY322338
Carex sciocapensis	Luceño, Márquez-Corro & Sánchez-Villegas	South Africa	Western Cape province, Calitzdorp, Matjiesgoedvallei, Wiswedel's farm.	UPOS 13984	MM3035	23-IX-2006	KY322168			KY322318
Carex sciocapensis	Luceño, Márquez-Corro & Sánchez-Villegas	South Africa	Eastern Cape province, Longmore Forest Reserve.	UPOS 13990	MM3831	23-I-2009	KY322165		KY322386	KY322341
Carex sciocapensis	Luceño, Márquez-Corro & Sánchez-Villegas	South Africa	Western Cape province, 25 km from Avontuur to Knysna via Prince Alfred's Pass.	UPOS 13985	MM5285	20-XII-2009				KY322323
Carex spartea	Wahlenb.	Kenya	Trans Nzoia County, Saiwa Samp N.P.	Z		16-X-2005	EU288648
Carex spartea	Wahlenb.	South Africa	KwaZulu-Natal province, Bushman´s Neck.	UPOS 3595	117ML08	18-XII-2008	KY322236			KY322345
Carex spartea	Wahlenb.	South Africa	KwaZulu-Natal province, Garden Castle Forest Reserve, path to Rhino Peak.	UPOS 8550	146SMB10	19-XI-2010	KY322239			KY322329
Carex spartea	Wahlenb.	South Africa	Kwazulu-Natal, Cordillera Drakensberg, a unos 40km de Underberg, Bushman´s Nek natural reserve.	UPOS 8551	154SMB10	20-XI-2010	KY322241			KY322380
Carex spartea	Wahlenb.	South Africa	Western Cape province, Mossel Bay.	UPOS 14040	183JMC17	14-X-2017	MW574414	MW584591	MW584601	MW584611
Carex spartea	Wahlenb.	South Africa	KwaZulu-Natal province, Ntbamhlophe.	UPOS 14066	46EMS12	10-X-2012	KY322234	KY322251	KY322364	KY322295
Carex spartea	Wahlenb.	South Africa	KwaZulu-Natal province, Cathedral Peak area.	UPOS 8507	69EMS12	11-XI-2012	KY322242	KY322256	KY322370	KY322304
Carex spartea	Wahlenb.	South Africa	KwaZulu-Natal, Garden Castle.	UPOS 8553	84EMS12	16-XI-2012	KY322235	KY322252	KY322366	KY322298
Carex spartea	Wahlenb.	South Africa	Kwazulu-Natal.	Z, ZT	BG_Af467		U288644		GU176144
Carex spartea	Wahlenb.	South Africa	Eastern Cape province, Renosterberg area near Middelburg.	UPOS 14034	Clark 133	07-IV-2006	KY322230	KY322270	KY322388	KY322342
Carex spartea	Wahlenb.	South Africa	Eastern Cape province, Queensbury.	UPOS 14008	MDO622	III-2006	KY352041
Carex spartea	Wahlenb.	South Africa	KwaZulu-Natal province, Izotsha Creek, between Margate and Port Shepstone.	UPOS 14005	MM3644	10-I-2008	KY322234			KY322344
Carex spartea	Wahlenb.	South Africa	Kwazulu-Natal.	UPOS	MM4900a		KY322240			KY322312
Carex spartea	Wahlenb.	South Africa	KwaZulu-Natal province, Pevensey road from Bulwer.	UPOS 14009	MM4913	08-XI-2009	KY322238			KY322339
Carex spartea	Wahlenb.	South Africa	Eastern Cape province, Kleinrivier Wilderness.	UPOS 14007	MM5176	16-XII-2009	KY322228			KY322324
Carex spartea	Wahlenb.	South Africa	Eastern Cape province, Kleinrivier Wilderness.	UPOS 14033	MM5186	17-XII-2009	KY322229			KY322330
Carex spartea	Wahlenb.	Lesotho	Maseru district, Semonkong.	UPOS 8549	111TVH14	18-I-2014					SAMN10873005
Carex spartea	Wahlenb.	Lesotho	Leribe District.	UPOS 8543	53TVH14	15-I-2014					SAMN10873003
Carex spartea	Wahlenb.	Lesotho	Leribe District.	UPOS 8544	66TVH14	15-I-2014					SAMN10873004
Carex spatea	Wahlenb.	Lesotho	Maseru district, Semonkong.	UPOS 8548	104TVH14	17-I-2014					SAMN10873006
Carex spatea	Wahlenb.	South Africa	Kwazulu-Natal, Drakensberg Mountains.	UPOS 8551	154SMB10	20-XI-2010					SAMN10873008
Carex spatea	Wahlenb.	Lesotho	Leribe district.	UPOS 14065	65TVH14	15-I-2014					SAMN10873007
