# Supplementary material for: An integrative monograph of Carex section Schoenoxiphium (Cyperaceae)
Source: PeerJ. 2021 May 17;9:e11336. doi: 10.7717/peerj.11336 (PMC8136282; doi:10.7717/peerj.11336)
Supplement: Supplemental Information 3 — Number of taxa, aligment length, number of variable site and parsimony informative sites are indicated for each individual matrix. [file peerj-09-11336-s003.xlsx]

## Sheet: Sanger_matrices_summary.txt
Alignment_name	No_of_taxa	Alignment_length	Total_matrix_cells	Undetermined_characters	No_variable_sites	Parsimony_informative_sites	A	C	G	T	K	M	R	Y	S	W	B	V	H	D	X	N	O	-	?
ETS	111	597	66267	42932	150	111	2928	6431	7282	6636	6	1	15	27	4	5	0	0	0	0	0	0	0	267	42665
ITS	111	622	69042	9380	145	95	11188	19599	19427	9319	6	7	22	82	12	0	0	0	0	0	0	0	0	1238	8142
matk	91	816	74256	34450	89	62	12357	5476	5527	16441	0	0	1	3	0	1	0	0	0	0	0	0	0	1049	33401
rps16	91	909	82719	17081	110	75	25673	7853	9817	22285	0	4	2	0	3	1	0	0	0	0	0	0	0	11261	5820
